# Supplementary material for: Chromosome-level assembly of the Clinopodium gracile genome
Source: Front Plant Sci. 2024 Nov 11;15:1489102. doi: 10.3389/fpls.2024.1489102 (PMC11586180; doi:10.3389/fpls.2024.1489102)
Supplement: Supplementary file 1 [file DataSheet1.xlsx]

## Sheet: Table S1
Table S1 Statistical analysis of sequencing data
Sequence types	number of reads	Total length (bp)	Coverage
DNA-Seq short read	115458740	34637622000	107.479	322274450	307.345	34.6805
Nanopore long read	2289797	34848896652	108.134	322274451
Hi-C short read	309334170	46400125500	143.977	322274452
				268.733

## Sheet: Table S2
Table S2 Busco analysis results
Type	Number	Ratio
Complete BUSCOs (C)	1569	0.9721
Complete and single-copy BUSCOs (S)	1528	0.947
Complete and duplicated BUSCOs (D)	41	0.025
Fragmented BUSCOs (F)	15	0.009
Missing BUSCOs (M)	30	0.019
Total BUSCO groups searched	1614	1

## Sheet: TableS3
Table S3 Gene Structure Statistics
Features	Number
Number of genes	40614
Number of protein-coding gene	40083
Mean cds length (bp)	978.15
Mean exon length (bp)	224.22
Mean intron length (bp)	318.88
Mean exons per gene	4.33

## Sheet: Table S4
Table S4 Sources of the 11 plant sequences used in phylogenetic tree construction
	Species	Data sources
1	Oryza sativa	CNGB GWHBQCV00000000
2	Amborella trichopoda	NCBI GCF_000471905.2
3	Arabidopsis thaliana	NCBI GCF_000001735.4
4	Coffea canephora	NCBI GCA_900059795.1
5	Vitis vinifera	NCBI GCF_000003745.3
6	Salvia_miltiorrhiza	NCBI GCF_028751815.1
7	Clinopodium gracile	This work
8	Leonurus_japonicus	CNGB GWHBQCV00000000
9	Tectona grandis	GigaDB http://gigadb.org/dataset/100550
10	Theobroma cacao	NCBI GCF_000208745.1
11	Solanum lycopersicum	NCBI GCF_000188115.5

## Sheet: Table S5
Table S5 A list of single-copy genes from eleven plants
cluster_name	protein_number	swiss_prot_id	go_annotation	protein_list
cluster12844	11	O65628	GO:0002143; P:tRNA wobble position uridine thiolation; IBA:GO_Central	Clinopodium_gracile|Clgra_023405-T1;Coffea_canephora|CDP14111.1;Leonurus_japonicus|GWHPBQCV005173_mRNA=GWHTBQCV005173_Gene=GWHGBQCV005173_Position=GWHBQCV00000010:;Theobroma_cacao|XP_007028730.2;Tectona_grandis|Tg01g01990.t1;Amborella_trichopoda|XP_006845255.1;Solanum_lycopersicum|XP_004249262.1;Vitis_vinifera|XP_002278289.1;Oryza_sativa|XP_015618182.1;Arabidopsis_thaliana|NP_567993.1;Salvia_milt…
cluster12845	11	Q9SVX5	GO:0045893; P:positive regulation of transcription, DNA-templated; IBA:GO_Central	Clinopodium_gracile|Clgra_023433-T1;Coffea_canephora|CDP10066.1;Leonurus_japonicus|GWHPBQCV005208_mRNA=GWHTBQCV005208_Gene=GWHGBQCV005208_Position=GWHBQCV00000010:;Theobroma_cacao|XP_007028832.2;Tectona_grandis|Tg01g01620.t1;Amborella_trichopoda|XP_020526280.1;Solanum_lycopersicum|XP_004249756.1;Vitis_vinifera|XP_002277662.2;Oryza_sativa|XP_025879844.1;Arabidopsis_thaliana|NP_191319.1;Salvia_milt…
cluster12846	11	Q9FGK0	GO:0055114; P:oxidation-reduction process; IEA:UniProtKB-KW	Clinopodium_gracile|Clgra_038403-T1;Coffea_canephora|CDP09936.1;Leonurus_japonicus|GWHPBQCV023613_mRNA=GWHTBQCV023613_Gene=GWHGBQCV023613_Position=GWHBQCV00000007:;Theobroma_cacao|XP_017973738.1;Tectona_grandis|Tg19g00240.t1;Amborella_trichopoda|XP_006830041.1;Solanum_lycopersicum|XP_004245753.1;Vitis_vinifera|XP_010662384.1;Oryza_sativa|XP_015612948.1;Arabidopsis_thaliana|NP_568684.1;Salvia_milt…
cluster12848	11	Q3E9D5	GO:0006597; P:spermine biosynthetic process; IMP:UniProtKB	Clinopodium_gracile|Clgra_037907-T1;Coffea_canephora|CDO98960.1;Leonurus_japonicus|GWHPBQCV024546_mRNA=GWHTBQCV024546_Gene=GWHGBQCV024546_Position=GWHBQCV00000008:;Theobroma_cacao|XP_007035369.1;Tectona_grandis|Tg04g03710.t1;Amborella_trichopoda|XP_006850850.1;Solanum_lycopersicum|XP_004229470.1;Vitis_vinifera|XP_002277316.1;Oryza_sativa|XP_015638505.1;Arabidopsis_thaliana|NP_197394.1;Salvia_milt…
cluster12851	11	Q9STM6	GO:0016042; P:lipid catabolic process; IEA:UniProtKB-KW	Theobroma_cacao|XP_017972189.1;Clinopodium_gracile|Clgra_009290-T1;Coffea_canephora|CDP15060.1;Leonurus_japonicus|GWHPBQCV010883_mRNA=GWHTBQCV010883_Gene=GWHGBQCV010883_Position=GWHBQCV00000003:;Tectona_grandis|Tg10g16090.t1;Amborella_trichopoda|XP_006852134.1;Solanum_lycopersicum|XP_004236316.1;Vitis_vinifera|XP_002274810.1;Oryza_sativa|XP_015632263.1;Arabidopsis_thaliana|NP_190416.1;Salvia_milt…
cluster12852	11	P58992	GO:0005506; F:iron ion binding; IEA:InterPro	Clinopodium_gracile|Clgra_007664-T1;Coffea_canephora|CDO98297.1;Leonurus_japonicus|GWHPBQCV010807_mRNA=GWHTBQCV010807_Gene=GWHGBQCV010807_Position=GWHBQCV00000003:;Theobroma_cacao|XP_017973343.1;Tectona_grandis|Tg10g10100.t1;Amborella_trichopoda|XP_006844449.1;Solanum_lycopersicum|XP_004235856.1;Vitis_vinifera|XP_002284699.1;Oryza_sativa|XP_015615806.1;Arabidopsis_thaliana|NP_568749.1;Salvia_milt…
cluster12857	11	Q9XGY4	GO:0072321; P:chaperone-mediated protein transport; IEA:InterPro	Clinopodium_gracile|Clgra_027470-T1;Coffea_canephora|CDP14990.1;Leonurus_japonicus|GWHPBQCV012461_mRNA=GWHTBQCV012461_Gene=GWHGBQCV012461_Position=GWHBQCV00000004:;Theobroma_cacao|XP_017972404.1;Tectona_grandis|Tg16g09070.t1;Amborella_trichopoda|XP_006844576.1;Solanum_lycopersicum|XP_004241454.1;Vitis_vinifera|XP_002284270.1;Oryza_sativa|XP_015650330.1;Arabidopsis_thaliana|NP_199894.1;Salvia_milt…
cluster12861	11	Q9M394	GO:0042793; P:plastid transcription; IMP:TAIR	Clinopodium_gracile|Clgra_010067-T1;Coffea_canephora|CDP06530.1;Leonurus_japonicus|GWHPBQCV027689_mRNA=GWHTBQCV027689_Gene=GWHGBQCV027689_Position=GWHBQCV00000009:;Theobroma_cacao|XP_017976892.1;Tectona_grandis|Tg13g11930.t1;Amborella_trichopoda|XP_011624700.1;Solanum_lycopersicum|XP_004246362.1;Vitis_vinifera|XP_002273576.2;Oryza_sativa|XP_015616764.1;Arabidopsis_thaliana|NP_190977.1;Salvia_milt…
cluster12864	11	Q9SLB7	GO:0045893; P:positive regulation of transcription, DNA-templated; IDA:UniProtKB	Clinopodium_gracile|Clgra_018279-T1;Coffea_canephora|CDP03724.1;Leonurus_japonicus|GWHPBQCV004331_mRNA=GWHTBQCV004331_Gene=GWHGBQCV004331_Position=GWHBQCV00000010:;Theobroma_cacao|XP_007050346.1;Tectona_grandis|Tg05g10550.t1;Solanum_lycopersicum|XP_010326442.1;Vitis_vinifera|XP_002263559.1;Salvia_miltiorrhiza|XP_057781260.1;Oryza_sativa|XP_015626197.1;Amborella_trichopoda|XP_011625894.1;Arabidops…
cluster12868	11	O23038	GO:0045490; P:pectin catabolic process; IBA:GO_Central	Clinopodium_gracile|Clgra_027479-T1;Coffea_canephora|CDP08865.1;Leonurus_japonicus|GWHPBQCV011019_mRNA=GWHTBQCV011019_Gene=GWHGBQCV011019_Position=GWHBQCV00000003:;Theobroma_cacao|XP_007049055.1;Tectona_grandis|Tg10g07610.t1;Solanum_lycopersicum|XP_004243648.1;Vitis_vinifera|XP_002267842.1;Salvia_miltiorrhiza|XP_057804877.1;Oryza_sativa|XP_015650404.1;Amborella_trichopoda|XP_020517865.1;Arabidops…
cluster12870	11	N/A	N/A	Clinopodium_gracile|Clgra_031595-T1;Coffea_canephora|CDP13219.1;Leonurus_japonicus|GWHPBQCV028027_mRNA=GWHTBQCV028027_Gene=GWHGBQCV028027_Position=GWHBQCV00000009:;Theobroma_cacao|XP_007044791.2;Tectona_grandis|Tg15g08480.t1;Amborella_trichopoda|XP_006845264.1;Solanum_lycopersicum|XP_004239127.1;Vitis_vinifera|XP_002272662.1;Oryza_sativa|XP_015632766.1;Arabidopsis_thaliana|NP_189290.1;Salvia_milt…
cluster12871	11	N/A	N/A	Clinopodium_gracile|Clgra_037464-T1;Coffea_canephora|CDP00852.1;Leonurus_japonicus|GWHPBQCV018433_mRNA=GWHTBQCV018433_Gene=GWHGBQCV018433_Position=GWHBQCV00000006:;Theobroma_cacao|XP_007019800.1;Tectona_grandis|Tg03g13110.t2;Amborella_trichopoda|XP_006836800.1;Solanum_lycopersicum|XP_004241921.1;Vitis_vinifera|XP_002280799.1;Oryza_sativa|XP_015649828.1;Arabidopsis_thaliana|NP_564429.1;Salvia_milt…
cluster12874	11	N/A	N/A	Clinopodium_gracile|Clgra_032477-T1;Coffea_canephora|CDP18500.1;Leonurus_japonicus|GWHPBQCV017579_mRNA=GWHTBQCV017579_Gene=GWHGBQCV017579_Position=GWHBQCV00000005:;Theobroma_cacao|XP_007049061.2;Tectona_grandis|Tg17g14700.t1;Amborella_trichopoda|XP_006853489.2;Solanum_lycopersicum|XP_004243655.1;Vitis_vinifera|XP_002264361.1;Oryza_sativa|XP_015635206.1;Arabidopsis_thaliana|NP_567459.5;Salvia_milt…
cluster12876	11	Q9FG89	GO:0006979; P:response to oxidative stress; IMP:TAIR	Clinopodium_gracile|Clgra_024858-T1;Coffea_canephora|CDP20690.1;Leonurus_japonicus|GWHPBQCV024366_mRNA=GWHTBQCV024366_Gene=GWHGBQCV024366_Position=GWHBQCV00000008:;Theobroma_cacao|XP_017974970.1;Tectona_grandis|Tg04g06170.t3;Amborella_trichopoda|XP_006838885.1;Solanum_lycopersicum|XP_004247633.1;Vitis_vinifera|XP_002280020.1;Oryza_sativa|XP_015613463.1;Arabidopsis_thaliana|NP_568629.1;Salvia_milt…
cluster12877	11	Q9CA68	GO:0016042; P:lipid catabolic process; IEA:UniProtKB-KW	Clinopodium_gracile|Clgra_006104-T1;Coffea_canephora|CDP12298.1;Leonurus_japonicus|GWHPBQCV016649_mRNA=GWHTBQCV016649_Gene=GWHGBQCV016649_Position=GWHBQCV00000005:;Theobroma_cacao|XP_017972429.1;Tectona_grandis|Tg11g03550.t1;Amborella_trichopoda|XP_020521951.1;Solanum_lycopersicum|XP_004236009.1;Vitis_vinifera|XP_002284894.2;Oryza_sativa|XP_015641989.1;Arabidopsis_thaliana|NP_177586.1;Salvia_milt…
cluster12878	11	Q6NKW9	GO:0009664; P:plant-type cell wall organization; IMP:TAIR	Clinopodium_gracile|Clgra_035572-T1;Coffea_canephora|CDP12875.1;Leonurus_japonicus|GWHPBQCV022978_mRNA=GWHTBQCV022978_Gene=GWHGBQCV022978_Position=GWHBQCV00000007:;Theobroma_cacao|XP_007048158.2;Tectona_grandis|Tg09g11790.t1;Solanum_lycopersicum|XP_004237474.1;Vitis_vinifera|XP_002275701.1;Oryza_sativa|XP_015642488.1;Arabidopsis_thaliana|NP_201284.1;Salvia_miltiorrhiza|XP_057775026.1;Amborella_tr…
cluster12879	11	Q8VYR5	GO:0005739; C:mitochondrion; IDA:TAIR	Clinopodium_gracile|Clgra_006315-T1;Coffea_canephora|CDP11275.1;Leonurus_japonicus|GWHPBQCV016523_mRNA=GWHTBQCV016523_Gene=GWHGBQCV016523_Position=GWHBQCV00000005:;Theobroma_cacao|XP_007031650.2;Tectona_grandis|Tg15g00970.t1;Amborella_trichopoda|XP_006848937.1;Solanum_lycopersicum|XP_004231080.1;Vitis_vinifera|XP_002270990.1;Oryza_sativa|XP_015640746.1;Arabidopsis_thaliana|NP_567990.1;Salvia_milt…
cluster12880	11	P0C896	GO:0005739; C:mitochondrion; IBA:GO_Central	Clinopodium_gracile|Clgra_037048-T1;Coffea_canephora|CDP11002.1;Leonurus_japonicus|GWHPBQCV019168_mRNA=GWHTBQCV019168_Gene=GWHGBQCV019168_Position=GWHBQCV00000006:;Theobroma_cacao|XP_017978724.1;Tectona_grandis|Tg03g08350.t1;Solanum_lycopersicum|XP_004249853.1;Vitis_vinifera|XP_010646461.1;Oryza_sativa|XP_015650149.1;Arabidopsis_thaliana|NP_186914.2;Salvia_miltiorrhiza|XP_057795679.1;Amborella_tr…
cluster12890	11	Q9FKM7	GO:0009733; P:response to auxin; TAS:TAIR	Clinopodium_gracile|Clgra_023074-T1;Coffea_canephora|CDP02980.1;Leonurus_japonicus|GWHPBQCV004706_mRNA=GWHTBQCV004706_Gene=GWHGBQCV004706_Position=GWHBQCV00000010:;Theobroma_cacao|XP_007014272.2;Tectona_grandis|Tg01g05980.t1;Amborella_trichopoda|XP_006845639.1;Solanum_lycopersicum|NP_001266093.1;Vitis_vinifera|XP_002268816.1;Oryza_sativa|XP_015635277.1;Arabidopsis_thaliana|NP_200552.1;Salvia_milt…
cluster12894	11	P80470	GO:0015979; P:photosynthesis; IEA:UniProtKB-KW	Clinopodium_gracile|Clgra_000051-T1;Coffea_canephora|CDP13272.1;Leonurus_japonicus|GWHPBQCV020460_mRNA=GWHTBQCV020460_Gene=GWHGBQCV020460_Position=GWHBQCV00000006:;Theobroma_cacao|XP_007044927.2;Tectona_grandis|Tg11g13920.t1;Amborella_trichopoda|XP_006852245.2;Solanum_lycopersicum|XP_004249106.1;Vitis_vinifera|XP_002285325.1;Oryza_sativa|XP_015650214.1;Arabidopsis_thaliana|NP_176940.1;Salvia_milt…
cluster12895	11	Q94A20	GO:0016021; C:integral component of membrane; IEA:UniProtKB-KW	Clinopodium_gracile|Clgra_037914-T1;Coffea_canephora|CDO98965.1;Leonurus_japonicus|GWHPBQCV024540_mRNA=GWHTBQCV024540_Gene=GWHGBQCV024540_Position=GWHBQCV00000008:;Theobroma_cacao|XP_007035357.1;Tectona_grandis|TgUn566g00020.t1;Amborella_trichopoda|XP_006850841.1;Solanum_lycopersicum|XP_004229465.1;Vitis_vinifera|XP_002279368.2;Oryza_sativa|XP_015640550.1;Arabidopsis_thaliana|NP_567466.1;Salvia_m…
cluster12897	11	Q9LXA8	GO:0045493; P:xylan catabolic process; IBA:GO_Central	Clinopodium_gracile|Clgra_036130-T1;Coffea_canephora|CDP02677.1;Leonurus_japonicus|GWHPBQCV022626_mRNA=GWHTBQCV022626_Gene=GWHGBQCV022626_Position=GWHBQCV00000007:;Theobroma_cacao|XP_017969436.1;Tectona_grandis|Tg09g07090.t1;Amborella_trichopoda|XP_006850394.1;Solanum_lycopersicum|XP_004231972.1;Vitis_vinifera|XP_002264031.2;Oryza_sativa|XP_015637052.2;Arabidopsis_thaliana|NP_196618.1;Salvia_milt…
cluster12900	11	Q9ZVT7	GO:0034475; P:U4 snRNA 3'-end processing; IBA:GO_Central	Clinopodium_gracile|Clgra_031230-T1;Coffea_canephora|CDP19450.1;Leonurus_japonicus|GWHPBQCV008518_mRNA=GWHTBQCV008518_Gene=GWHGBQCV008518_Position=GWHBQCV00000002:;Theobroma_cacao|XP_007048187.2;Tectona_grandis|Tg14g13310.t1;Amborella_trichopoda|XP_006850847.1;Solanum_lycopersicum|XP_004247486.1;Vitis_vinifera|XP_002271258.1;Oryza_sativa|XP_015633681.1;Arabidopsis_thaliana|NP_171835.1;Salvia_milt…
cluster12902	11	N/A	N/A	Clinopodium_gracile|Clgra_035764-T1;Coffea_canephora|CDP01577.1;Leonurus_japonicus|GWHPBQCV022377_mRNA=GWHTBQCV022377_Gene=GWHGBQCV022377_Position=GWHBQCV00000007:;Theobroma_cacao|XP_007047763.2;Tectona_grandis|Tg09g10060.t5;Amborella_trichopoda|XP_006852902.2;Solanum_lycopersicum|XP_004240029.1;Vitis_vinifera|XP_002274187.4;Oryza_sativa|XP_015631124.2;Arabidopsis_thaliana|NP_201357.2;Salvia_milt…
cluster12903	11	Q9SV84	GO:0010036; P:response to boron-containing substance; IMP:TAIR	Clinopodium_gracile|Clgra_035424-T1;Coffea_canephora|CDP12262.1;Leonurus_japonicus|GWHPBQCV022819_mRNA=GWHTBQCV022819_Gene=GWHGBQCV022819_Position=GWHBQCV00000007:;Theobroma_cacao|XP_007039259.1;Tectona_grandis|Tg09g12790.t1;Amborella_trichopoda|XP_006828763.1;Solanum_lycopersicum|NP_001274288.1;Vitis_vinifera|XP_002276319.1;Oryza_sativa|XP_015614995.1;Arabidopsis_thaliana|NP_192776.1;Salvia_milt…
cluster12905	11	N/A	N/A	Clinopodium_gracile|Clgra_015710-T1;Coffea_canephora|CDP07753.1;Leonurus_japonicus|GWHPBQCV021622_mRNA=GWHTBQCV021622_Gene=GWHGBQCV021622_Position=GWHBQCV00000007:;Theobroma_cacao|XP_007052552.2;Tectona_grandis|Tg05g14550.t1;Amborella_trichopoda|XP_006850164.1;Solanum_lycopersicum|XP_004236025.1;Vitis_vinifera|XP_003633576.1;Oryza_sativa|XP_025878645.1;Arabidopsis_thaliana|NP_566431.1;Salvia_milt…
cluster12916	11	Q8W117	GO:0008380; P:RNA splicing; IMP:TAIR	Clinopodium_gracile|Clgra_037458-T1;Coffea_canephora|CDP18866.1;Leonurus_japonicus|GWHPBQCV018429_mRNA=GWHTBQCV018429_Gene=GWHGBQCV018429_Position=GWHBQCV00000006:;Theobroma_cacao|XP_017981545.1;Tectona_grandis|Tg03g13070.t4;Amborella_trichopoda|XP_006857907.1;Solanum_lycopersicum|NP_001234868.2;Vitis_vinifera|XP_002281533.1;Oryza_sativa|XP_015621621.1;Arabidopsis_thaliana|NP_177513.2;Salvia_milt…
cluster12919	11	Q9LIQ4	GO:0036172; P:thiamine salvage; IDA:UniProtKB	Clinopodium_gracile|Clgra_038459-T1;Coffea_canephora|CDO99389.1;Leonurus_japonicus|GWHPBQCV025086_mRNA=GWHTBQCV025086_Gene=GWHGBQCV025086_Position=GWHBQCV00000008:;Theobroma_cacao|XP_007034495.2;Tectona_grandis|Tg04g11690.t2;Amborella_trichopoda|XP_006854274.1;Solanum_lycopersicum|XP_004239873.1;Vitis_vinifera|XP_002282966.2;Oryza_sativa|XP_015611592.1;Arabidopsis_thaliana|NP_001319628.1;Salvia_m…
cluster12929	11	Q9SJ02	GO:0009611; P:response to wounding; IEP:UniProtKB	Clinopodium_gracile|Clgra_035598-T1;Coffea_canephora|CDP12913.1;Leonurus_japonicus|GWHPBQCV022950_mRNA=GWHTBQCV022950_Gene=GWHGBQCV022950_Position=GWHBQCV00000007:;Theobroma_cacao|XP_007048109.2;Tectona_grandis|Tg09g11620.t1;Amborella_trichopoda|XP_006827097.1;Solanum_lycopersicum|XP_004237444.1;Vitis_vinifera|XP_002280145.1;Oryza_sativa|XP_015633537.1;Arabidopsis_thaliana|NP_565524.1;Salvia_milt…
cluster12934	11	N/A	N/A	Clinopodium_gracile|Clgra_000309-T1;Coffea_canephora|CDP00663.1;Leonurus_japonicus|GWHPBQCV019937_mRNA=GWHTBQCV019937_Gene=GWHGBQCV019937_Position=GWHBQCV00000006:;Theobroma_cacao|XP_007044238.1;Tectona_grandis|Tg11g09980.t1;Amborella_trichopoda|XP_006855796.1;Solanum_lycopersicum|XP_004238896.1;Vitis_vinifera|XP_002282799.1;Oryza_sativa|XP_015650940.1;Arabidopsis_thaliana|NP_564925.1;Salvia_milt…
cluster12935	11	N/A	N/A	Clinopodium_gracile|Clgra_037095-T1;Coffea_canephora|CDP10907.1;Leonurus_japonicus|GWHPBQCV019209_mRNA=GWHTBQCV019209_Gene=GWHGBQCV019209_Position=GWHBQCV00000006:;Theobroma_cacao|XP_007019068.1;Tectona_grandis|Tg03g08750.t1;Amborella_trichopoda|XP_006847034.1;Solanum_lycopersicum|XP_004250349.1;Vitis_vinifera|XP_002285854.1;Arabidopsis_thaliana|NP_173601.2;Salvia_miltiorrhiza|XP_057795761.1;Oryz…
cluster12938	11	Q9FX64	GO:0051026; P:chiasma assembly; IMP:TAIR	Clinopodium_gracile|Clgra_032102-T1;Coffea_canephora|CDP00600.1;Leonurus_japonicus|GWHPBQCV026066_mRNA=GWHTBQCV026066_Gene=GWHGBQCV026066_Position=GWHBQCV00000008:;Theobroma_cacao|XP_007046267.2;Tectona_grandis|Tg15g13160.t1;Amborella_trichopoda|XP_020520055.1;Solanum_lycopersicum|XP_004238942.1;Vitis_vinifera|XP_002279040.1;Oryza_sativa|XP_015632741.1;Arabidopsis_thaliana|NP_172791.1;Salvia_milt…
cluster12939	11	Q9XI74	GO:0009409; P:response to cold; IBA:GO_Central	Clinopodium_gracile|Clgra_031865-T1;Coffea_canephora|CDP00364.1;Leonurus_japonicus|GWHPBQCV028229_mRNA=GWHTBQCV028229_Gene=GWHGBQCV028229_Position=GWHBQCV00000009:;Theobroma_cacao|XP_007046026.2;Tectona_grandis|Tg15g11070.t1;Amborella_trichopoda|XP_006827319.3;Solanum_lycopersicum|XP_004238805.1;Vitis_vinifera|XP_002268605.1;Oryza_sativa|XP_015636356.1;Arabidopsis_thaliana|NP_172866.1;Salvia_milt…
cluster12941	11	O64886	GO:0048034; P:heme O biosynthetic process; IEA:InterPro	Clinopodium_gracile|Clgra_025922-T1;Coffea_canephora|CDP09350.1;Leonurus_japonicus|GWHPBQCV003936_mRNA=GWHTBQCV003936_Gene=GWHGBQCV003936_Position=GWHBQCV00000010:;Theobroma_cacao|XP_007034524.2;Tectona_grandis|Tg06g05820.t1;Amborella_trichopoda|XP_006841077.1;Solanum_lycopersicum|XP_004229507.1;Vitis_vinifera|XP_002265039.1;Oryza_sativa|XP_015622414.2;Arabidopsis_thaliana|NP_566019.1;Salvia_milt…
cluster12947	11	N/A	N/A	Clinopodium_gracile|Clgra_023654-T1;Coffea_canephora|CDP13471.1;Leonurus_japonicus|GWHPBQCV012168_mRNA=GWHTBQCV012168_Gene=GWHGBQCV012168_Position=GWHBQCV00000004:;Theobroma_cacao|XP_007012426.2;Tectona_grandis|Tg05g00820.t1;Amborella_trichopoda|XP_006849672.1;Solanum_lycopersicum|XP_004245047.1;Vitis_vinifera|XP_010648388.1;Oryza_sativa|XP_015629730.1;Arabidopsis_thaliana|NP_680179.2;Salvia_milt…
cluster12951	11	Q9LUM3	GO:0004252; F:serine-type endopeptidase activity; IEA:InterPro	Clinopodium_gracile|Clgra_006657-T1;Coffea_canephora|CDO97802.1;Leonurus_japonicus|GWHPBQCV010114_mRNA=GWHTBQCV010114_Gene=GWHGBQCV010114_Position=GWHBQCV00000003:;Theobroma_cacao|XP_007024750.2;Tectona_grandis|Tg10g16710.t1;Amborella_trichopoda|XP_006828664.1;Solanum_lycopersicum|XP_004235537.1;Vitis_vinifera|XP_003632775.1;Oryza_sativa|XP_015648877.1;Arabidopsis_thaliana|NP_566483.1;Salvia_milt…
cluster12954	11	Q9SGW3	GO:0009647; P:skotomorphogenesis; IMP:TAIR	Clinopodium_gracile|Clgra_001161-T1;Coffea_canephora|CDP12187.1;Leonurus_japonicus|GWHPBQCV009455_mRNA=GWHTBQCV009455_Gene=GWHGBQCV009455_Position=GWHBQCV00000003:;Theobroma_cacao|XP_007029492.1;Tectona_grandis|Tg16g04000.t1;Amborella_trichopoda|XP_006852595.1;Solanum_lycopersicum|XP_004245492.1;Vitis_vinifera|XP_002264255.1;Oryza_sativa|XP_015648042.1;Arabidopsis_thaliana|NP_176633.1;Salvia_milt…
cluster12958	11	Q84JG2	GO:0007275; P:multicellular organism development; IEA:UniProtKB-KW	Clinopodium_gracile|Clgra_029321-T1;Coffea_canephora|CDP07255.1;Leonurus_japonicus|GWHPBQCV014264_mRNA=GWHTBQCV014264_Gene=GWHGBQCV014264_Position=GWHBQCV00000004:;Theobroma_cacao|XP_007018665.2;Tectona_grandis|Tg08g07190.t1;Amborella_trichopoda|XP_006849963.1;Solanum_lycopersicum|XP_004238459.1;Vitis_vinifera|XP_002275451.1;Oryza_sativa|XP_015625317.1;Arabidopsis_thaliana|NP_180919.2;Salvia_milt…
cluster12959	11	P74261	GO:0006396; P:RNA processing; IEA:InterPro	Clinopodium_gracile|Clgra_035770-T1;Coffea_canephora|CDP22167.1;Leonurus_japonicus|GWHPBQCV022383_mRNA=GWHTBQCV022383_Gene=GWHGBQCV022383_Position=GWHBQCV00000007:;Theobroma_cacao|XP_007047743.2;Tectona_grandis|Tg09g09960.t1;Amborella_trichopoda|XP_020528183.1;Solanum_lycopersicum|XP_004250164.1;Vitis_vinifera|XP_019073696.1;Oryza_sativa|XP_015629171.1;Arabidopsis_thaliana|NP_195515.2;Salvia_milt…
cluster12960	11	Q1JPM5	GO:0006486; P:protein glycosylation; IEA:UniProtKB-UniPathway	Clinopodium_gracile|Clgra_026391-T1;Coffea_canephora|CDP09996.1;Leonurus_japonicus|GWHPBQCV023631_mRNA=GWHTBQCV023631_Gene=GWHGBQCV023631_Position=GWHBQCV00000007:;Theobroma_cacao|XP_017973412.1;Tectona_grandis|Tg19g04710.t1;Amborella_trichopoda|XP_006837314.1;Solanum_lycopersicum|XP_004245784.1;Vitis_vinifera|XP_002272057.2;Oryza_sativa|XP_015613117.1;Arabidopsis_thaliana|NP_193473.1;Salvia_milt…
cluster12968	11	Q9LRZ3	GO:0006417; P:regulation of translation; IEA:UniProtKB-KW	Clinopodium_gracile|Clgra_028625-T1;Coffea_canephora|CDO98815.1;Leonurus_japonicus|GWHPBQCV005695_mRNA=GWHTBQCV005695_Gene=GWHGBQCV005695_Position=GWHBQCV00000010:;Theobroma_cacao|XP_007035674.2;Tectona_grandis|Tg08g00910.t4;Amborella_trichopoda|XP_006841511.1;Solanum_lycopersicum|XP_004229278.1;Vitis_vinifera|XP_010649565.1;Oryza_sativa|XP_015631977.1;Arabidopsis_thaliana|NP_566559.1;Salvia_milt…
cluster12976	11	Q8GYX2	GO:0009744; P:response to sucrose; IEP:UniProtKB	Clinopodium_gracile|Clgra_022661-T1;Coffea_canephora|CDP20908.1;Leonurus_japonicus|GWHPBQCV005081_mRNA=GWHTBQCV005081_Gene=GWHGBQCV005081_Position=GWHBQCV00000010:;Theobroma_cacao|XP_017982844.1;Tectona_grandis|Tg01g11050.t1;Amborella_trichopoda|XP_006843916.1;Solanum_lycopersicum|XP_004243694.1;Vitis_vinifera|XP_002276822.1;Arabidopsis_thaliana|NP_197570.1;Salvia_miltiorrhiza|XP_057767556.1;Oryz…
cluster12978	11	Q9FJI1	GO:0009826; P:unidimensional cell growth; IMP:TAIR	Clinopodium_gracile|Clgra_016878-T1;Coffea_canephora|CDP12270.1;Leonurus_japonicus|GWHPBQCV013311_mRNA=GWHTBQCV013311_Gene=GWHGBQCV013311_Position=GWHBQCV00000004:;Theobroma_cacao|XP_007049714.1;Tectona_grandis|Tg14g04180.t1;Amborella_trichopoda|XP_011621091.1;Solanum_lycopersicum|NP_001266241.1;Vitis_vinifera|XP_010651129.1;Oryza_sativa|XP_015644786.2;Arabidopsis_thaliana|NP_200842.2;Salvia_milt…
cluster12979	11	Q9LF46	GO:0001561; P:fatty acid alpha-oxidation; IBA:GO_Central	Clinopodium_gracile|Clgra_021762-T1;Coffea_canephora|CDP02739.1;Leonurus_japonicus|GWHPBQCV005848_mRNA=GWHTBQCV005848_Gene=GWHGBQCV005848_Position=GWHBQCV00000002:;Theobroma_cacao|XP_017975490.1;Tectona_grandis|Tg06g18190.t1;Amborella_trichopoda|XP_006837289.1;Solanum_lycopersicum|XP_004232017.1;Vitis_vinifera|XP_002266004.1;Oryza_sativa|XP_015616825.1;Arabidopsis_thaliana|NP_197240.1;Salvia_milt…
cluster12983	11	N/A	N/A	Clinopodium_gracile|Clgra_008495-T1;Coffea_canephora|CDP06752.1;Leonurus_japonicus|GWHPBQCV006966_mRNA=GWHTBQCV006966_Gene=GWHGBQCV006966_Position=GWHBQCV00000002:;Theobroma_cacao|XP_017977783.1;Tectona_grandis|Tg02g00510.t1;Solanum_lycopersicum|XP_004246648.1;Vitis_vinifera|XP_010653587.1;Oryza_sativa|XP_015613011.1;Arabidopsis_thaliana|NP_850276.1;Salvia_miltiorrhiza|XP_057805408.1;Amborella_tr…
cluster12985	11	Q9SSD1	GO:0010090; P:trichome morphogenesis; IMP:UniProtKB	Clinopodium_gracile|Clgra_014411-T1;Coffea_canephora|CDP13043.1;Leonurus_japonicus|GWHPBQCV012192_mRNA=GWHTBQCV012192_Gene=GWHGBQCV012192_Position=GWHBQCV00000004:;Theobroma_cacao|XP_007023220.2;Tectona_grandis|Tg16g10680.t1;Amborella_trichopoda|XP_020529657.1;Solanum_lycopersicum|XP_004252485.1;Vitis_vinifera|XP_002265327.1;Oryza_sativa|XP_025878348.1;Arabidopsis_thaliana|NP_178125.1;Salvia_milt…
cluster12986	11	Q9SJ74	GO:0055114; P:oxidation-reduction process; IEA:UniProtKB-KW	Clinopodium_gracile|Clgra_027991-T1;Coffea_canephora|CDO99367.1;Leonurus_japonicus|GWHPBQCV010503_mRNA=GWHTBQCV010503_Gene=GWHGBQCV010503_Position=GWHBQCV00000003:;Theobroma_cacao|XP_007049270.2;Tectona_grandis|Tg10g02810.t1;Amborella_trichopoda|XP_006856807.2;Solanum_lycopersicum|XP_004243539.1;Vitis_vinifera|XP_002262661.3;Oryza_sativa|XP_015628875.1;Arabidopsis_thaliana|NP_565316.1;Salvia_milt…
cluster12987	11	F4HWL3	GO:0005802; C:trans-Golgi network; IDA:TAIR	Clinopodium_gracile|Clgra_005090-T1;Coffea_canephora|CDO99510.1;Leonurus_japonicus|GWHPBQCV003109_mRNA=GWHTBQCV003109_Gene=GWHGBQCV003109_Position=GWHBQCV00000001:;Theobroma_cacao|XP_007025562.1;Tectona_grandis|Tg02g15370.t1;Amborella_trichopoda|XP_006853556.1;Solanum_lycopersicum|XP_004232910.1;Vitis_vinifera|XP_002279791.2;Oryza_sativa|XP_015645303.1;Arabidopsis_thaliana|NP_174156.1;Salvia_milt…
cluster12988	11	Q0WVD6	GO:0006355; P:regulation of transcription, DNA-templated; IBA:GO_Central	Clinopodium_gracile|Clgra_016231-T1;Coffea_canephora|CDO99112.1;Leonurus_japonicus|GWHPBQCV021505_mRNA=GWHTBQCV021505_Gene=GWHGBQCV021505_Position=GWHBQCV00000007:;Theobroma_cacao|XP_007010858.2;Tectona_grandis|Tg05g13260.t2;Amborella_trichopoda|XP_006832845.1;Solanum_lycopersicum|NP_001307272.1;Vitis_vinifera|XP_010659086.1;Oryza_sativa|XP_015647334.1;Arabidopsis_thaliana|NP_187835.2;Salvia_milt…
cluster12990	11	O23342	GO:0006605; P:protein targeting; IEA:InterPro	Clinopodium_gracile|Clgra_019332-T1;Coffea_canephora|CDO99065.1;Leonurus_japonicus|GWHPBQCV014563_mRNA=GWHTBQCV014563_Gene=GWHGBQCV014563_Position=GWHBQCV00000004:;Theobroma_cacao|XP_007034765.2;Tectona_grandis|Tg08g02680.t1;Amborella_trichopoda|XP_006850981.1;Solanum_lycopersicum|XP_004247563.1;Vitis_vinifera|XP_010649905.1;Oryza_sativa|XP_015634774.1;Arabidopsis_thaliana|NP_567446.1;Salvia_milt…
cluster12991	11	Q9ZS34	GO:0010189; P:vitamin E biosynthetic process; IMP:UniProtKB	Clinopodium_gracile|Clgra_027705-T1;Coffea_canephora|CDP12299.1;Leonurus_japonicus|GWHPBQCV011257_mRNA=GWHTBQCV011257_Gene=GWHGBQCV011257_Position=GWHBQCV00000003:;Theobroma_cacao|XP_007037369.1;Tectona_grandis|Tg10g05510.t1;Amborella_trichopoda|XP_020521921.1;Solanum_lycopersicum|XP_004235993.1;Vitis_vinifera|XP_002284906.1;Oryza_sativa|XP_015627112.1;Arabidopsis_thaliana|NP_177587.1;Salvia_milt…
cluster12994	11	P81383	GO:0035821; P:modification of morphology or physiology of other organism; IDA:UniProtKB	Clinopodium_gracile|Clgra_027020-T1;Coffea_canephora|CDO97483.1;Leonurus_japonicus|GWHPBQCV009596_mRNA=GWHTBQCV009596_Gene=GWHGBQCV009596_Position=GWHBQCV00000003:;Theobroma_cacao|XP_007043031.2;Tectona_grandis|Tg12g08950.t1;Amborella_trichopoda|XP_006845520.1;Solanum_lycopersicum|XP_004232522.1;Vitis_vinifera|XP_002266648.2;Oryza_sativa|XP_015645661.1;Arabidopsis_thaliana|NP_187569.1;Salvia_milt…
cluster12995	11	Q1PFE1	GO:0009873; P:ethylene-activated signaling pathway; IEA:UniProtKB-KW	Clinopodium_gracile|Clgra_006772-T1;Coffea_canephora|CDO97854.1;Leonurus_japonicus|GWHPBQCV010165_mRNA=GWHTBQCV010165_Gene=GWHGBQCV010165_Position=GWHBQCV00000003:;Theobroma_cacao|XP_007024618.2;Tectona_grandis|Tg10g16010.t1;Amborella_trichopoda|XP_011625364.2;Solanum_lycopersicum|XP_010318466.1;Vitis_vinifera|XP_010654442.1;Oryza_sativa|XP_015629390.1;Arabidopsis_thaliana|NP_177401.2;Salvia_milt…
cluster12996	11	F4IDS7	GO:0006904; P:vesicle docking involved in exocytosis; IBA:GO_Central	Clinopodium_gracile|Clgra_027980-T1;Coffea_canephora|CDP16924.1;Leonurus_japonicus|GWHPBQCV010512_mRNA=GWHTBQCV010512_Gene=GWHGBQCV010512_Position=GWHBQCV00000003:;Theobroma_cacao|XP_017971074.1;Tectona_grandis|Tg10g02910.t1;Amborella_trichopoda|XP_011628843.1;Solanum_lycopersicum|XP_004240341.1;Vitis_vinifera|XP_002271384.1;Oryza_sativa|XP_015650672.1;Arabidopsis_thaliana|NP_172709.2;Salvia_milt…
cluster12999	11	Q8RXN4	GO:0006635; P:fatty acid beta-oxidation; IBA:GO_Central	Oryza_sativa|XP_015612965.1;Arabidopsis_thaliana|NP_194909.2;Coffea_canephora|CDP07839.1;Theobroma_cacao|XP_007011716.2;Amborella_trichopoda|XP_006842725.2;Solanum_lycopersicum|XP_004249576.1;Clinopodium_gracile|Clgra_001424-T1;Vitis_vinifera|XP_002283319.1;Salvia_miltiorrhiza|XP_057810413.1;Leonurus_japonicus|GWHPBQCV011662_mRNA=GWHTBQCV011662_Gene=GWHGBQCV011662_Position=GWHBQCV00000003:;Tecton…
cluster13012	11	O04603	GO:0006412; P:translation; IEA:InterPro	Clinopodium_gracile|Clgra_025095-T1;Coffea_canephora|CDP08770.1;Leonurus_japonicus|GWHPBQCV003611_mRNA=GWHTBQCV003611_Gene=GWHGBQCV003611_Position=GWHBQCV00000010:;Theobroma_cacao|XP_007051719.2;Tectona_grandis|Tg06g01650.t1;Amborella_trichopoda|XP_006829072.1;Solanum_lycopersicum|XP_004246669.1;Vitis_vinifera|XP_002278820.1;Oryza_sativa|XP_015627856.1;Arabidopsis_thaliana|NP_192040.1;Salvia_milt…
cluster13013	11	P93050	GO:0006468; P:protein phosphorylation; IBA:GO_Central	Clinopodium_gracile|Clgra_031218-T1;Coffea_canephora|CDP03584.1;Leonurus_japonicus|GWHPBQCV008533_mRNA=GWHTBQCV008533_Gene=GWHGBQCV008533_Position=GWHBQCV00000002:;Theobroma_cacao|XP_017969675.1;Tectona_grandis|Tg14g13400.t1;Amborella_trichopoda|XP_006845812.1;Solanum_lycopersicum|XP_004247481.1;Vitis_vinifera|XP_003632362.1;Oryza_sativa|XP_015629504.1;Arabidopsis_thaliana|NP_182322.1;Salvia_milt…
cluster13014	11	Q8VXY7	GO:0005337; F:nucleoside transmembrane transporter activity; IBA:GO_Central	Clinopodium_gracile|Clgra_031654-T1;Coffea_canephora|CDP00175.1;Leonurus_japonicus|GWHPBQCV028076_mRNA=GWHTBQCV028076_Gene=GWHGBQCV028076_Position=GWHBQCV00000009:;Theobroma_cacao|XP_007044544.2;Tectona_grandis|Tg15g09070.t1;Amborella_trichopoda|XP_006844766.1;Solanum_lycopersicum|XP_004228548.1;Vitis_vinifera|XP_002263287.1;Oryza_sativa|XP_015651076.1;Arabidopsis_thaliana|NP_564987.2;Salvia_milt…
cluster13026	11	Q7Y211	GO:0009451; P:RNA modification; IBA:GO_Central	Clinopodium_gracile|Clgra_004047-T1;Coffea_canephora|CDP18169.1;Leonurus_japonicus|GWHPBQCV001968_mRNA=GWHTBQCV001968_Gene=GWHGBQCV001968_Position=GWHBQCV00000001:;Theobroma_cacao|XP_017970694.1;Tectona_grandis|Tg02g20640.t1;Amborella_trichopoda|XP_011626660.1;Solanum_lycopersicum|XP_004233766.1;Vitis_vinifera|XP_002275546.2;Oryza_sativa|XP_015634033.1;Arabidopsis_thaliana|NP_191302.2;Salvia_milt…
cluster13027	11	Q680K2	GO:0046872; F:metal ion binding; IEA:UniProtKB-KW	Clinopodium_gracile|Clgra_035699-T1;Coffea_canephora|CDP01487.1;Leonurus_japonicus|GWHPBQCV022319_mRNA=GWHTBQCV022319_Gene=GWHGBQCV022319_Position=GWHBQCV00000007:;Theobroma_cacao|XP_007047904.2;Tectona_grandis|Tg09g10630.t1;Amborella_trichopoda|XP_006853267.1;Solanum_lycopersicum|XP_004250102.1;Vitis_vinifera|XP_003635299.1;Oryza_sativa|XP_015648978.1;Arabidopsis_thaliana|NP_568077.1;Salvia_milt…
cluster13028	11	Q9FZ33	GO:0009612; P:response to mechanical stimulus; IMP:TAIR	Clinopodium_gracile|Clgra_026683-T1;Coffea_canephora|CDP15508.1;Leonurus_japonicus|GWHPBQCV016968_mRNA=GWHTBQCV016968_Gene=GWHGBQCV016968_Position=GWHBQCV00000005:;Theobroma_cacao|XP_007030822.1;Tectona_grandis|Tg06g09750.t1;Amborella_trichopoda|XP_006838261.1;Solanum_lycopersicum|XP_004230203.1;Vitis_vinifera|XP_002284549.1;Arabidopsis_thaliana|NP_564672.2;Salvia_miltiorrhiza|XP_057792078.1;Oryz…
cluster13029	11	N/A	N/A	Clinopodium_gracile|Clgra_018050-T1;Coffea_canephora|CDP03743.1;Leonurus_japonicus|GWHPBQCV004342_mRNA=GWHTBQCV004342_Gene=GWHGBQCV004342_Position=GWHBQCV00000010:;Theobroma_cacao|XP_007050297.2;Tectona_grandis|Tg05g10650.t3;Amborella_trichopoda|XP_006857282.1;Solanum_lycopersicum|XP_004242361.1;Vitis_vinifera|XP_002278457.1;Oryza_sativa|XP_015634214.1;Arabidopsis_thaliana|NP_565474.1;Salvia_milt…
cluster13035	11	Q9SV05	GO:0006468; P:protein phosphorylation; IBA:GO_Central	Clinopodium_gracile|Clgra_011293-T1;Coffea_canephora|CDO97591.1;Leonurus_japonicus|GWHPBQCV020838_mRNA=GWHTBQCV020838_Gene=GWHGBQCV020838_Position=GWHBQCV00000007:;Theobroma_cacao|XP_007041331.2;Tectona_grandis|Tg08g13060.t1;Solanum_lycopersicum|XP_004230467.1;Vitis_vinifera|XP_002264141.1;Oryza_sativa|XP_015633001.1;Arabidopsis_thaliana|NP_197708.1;Salvia_miltiorrhiza|XP_057780318.1;Amborella_tr…
cluster13036	11	Q94B71	GO:0010071; P:root meristem specification; IBA:GO_Central	Clinopodium_gracile|Clgra_000605-T1;Coffea_canephora|CDP05496.1;Leonurus_japonicus|GWHPBQCV011752_mRNA=GWHTBQCV011752_Gene=GWHGBQCV011752_Position=GWHBQCV00000003:;Theobroma_cacao|XP_017971604.1;Tectona_grandis|Tg11g08450.t1;Amborella_trichopoda|XP_006849421.2;Solanum_lycopersicum|XP_004239278.1;Vitis_vinifera|XP_002281609.2;Oryza_sativa|XP_015631483.1;Arabidopsis_thaliana|NP_563958.1;Salvia_milt…
cluster13037	11	Q9CAY1	GO:0009451; P:RNA modification; IBA:GO_Central	Clinopodium_gracile|Clgra_010706-T1;Coffea_canephora|CDP15436.1;Leonurus_japonicus|GWHPBQCV001832_mRNA=GWHTBQCV001832_Gene=GWHGBQCV001832_Position=GWHBQCV00000001:;Theobroma_cacao|XP_007027780.1;Tectona_grandis|Tg01g17600.t1;Solanum_lycopersicum|XP_004246502.1;Vitis_vinifera|XP_002276416.2;Oryza_sativa|XP_015620397.1;Arabidopsis_thaliana|NP_187753.1;Salvia_miltiorrhiza|XP_057777939.1;Amborella_tr…
cluster13039	11	Q54YG5	GO:0006888; P:ER to Golgi vesicle-mediated transport; IBA:GO_Central	Clinopodium_gracile|Clgra_022900-T1;Coffea_canephora|CDP10209.1;Leonurus_japonicus|GWHPBQCV027132_mRNA=GWHTBQCV027132_Gene=GWHGBQCV027132_Position=GWHBQCV00000009:;Theobroma_cacao|XP_007011967.1;Tectona_grandis|Tg01g08370.t1;Amborella_trichopoda|XP_006850855.1;Solanum_lycopersicum|XP_004236654.1;Vitis_vinifera|XP_002279200.1;Oryza_sativa|XP_015611668.1;Arabidopsis_thaliana|NP_200611.1;Salvia_milt…
cluster13041	11	K4BVL1	GO:0016021; C:integral component of membrane; IEA:UniProtKB-KW	Clinopodium_gracile|Clgra_036744-T1;Coffea_canephora|CDP07409.1;Leonurus_japonicus|GWHPBQCV018826_mRNA=GWHTBQCV018826_Gene=GWHGBQCV018826_Position=GWHBQCV00000006:;Theobroma_cacao|XP_007017784.2;Tectona_grandis|Tg03g03420.t1;Amborella_trichopoda|XP_006857244.3;Solanum_lycopersicum|NP_001307325.1;Vitis_vinifera|XP_002276528.2;Oryza_sativa|XP_015633255.1;Arabidopsis_thaliana|NP_177698.1;Salvia_milt…
cluster13042	11	N/A	N/A	Clinopodium_gracile|Clgra_010324-T1;Coffea_canephora|CDP19944.1;Leonurus_japonicus|GWHPBQCV017991_mRNA=GWHTBQCV017991_Gene=GWHGBQCV017991_Position=GWHBQCV00000006:;Theobroma_cacao|XP_007026550.2;Tectona_grandis|Tg01g20800.t1;Amborella_trichopoda|XP_006828158.1;Solanum_lycopersicum|XP_004246304.1;Vitis_vinifera|XP_002264939.1;Oryza_sativa|XP_015645015.1;Arabidopsis_thaliana|NP_195791.1;Salvia_milt…
cluster13048	11	Q2HIM5	GO:0022890; F:inorganic cation transmembrane transporter activity; IBA:GO_Central	Clinopodium_gracile|Clgra_008425-T1;Coffea_canephora|CDP06767.1;Leonurus_japonicus|GWHPBQCV007290_mRNA=GWHTBQCV007290_Gene=GWHGBQCV007290_Position=GWHBQCV00000002:;Theobroma_cacao|XP_007027390.2;Tectona_grandis|Tg02g00420.t2;Amborella_trichopoda|XP_011629315.1;Solanum_lycopersicum|XP_004246635.1;Vitis_vinifera|XP_002282209.1;Oryza_sativa|XP_015618425.1;Arabidopsis_thaliana|NP_568115.1;Salvia_milt…
cluster13056	11	O70333	GO:1902897; P:regulation of postsynaptic density protein 95 clustering; ISS:UniProtKB	Clinopodium_gracile|Clgra_000745-T1;Coffea_canephora|CDO99710.1;Leonurus_japonicus|GWHPBQCV014617_mRNA=GWHTBQCV014617_Gene=GWHGBQCV014617_Position=GWHBQCV00000004:;Theobroma_cacao|XP_007025989.1;Tectona_grandis|Tg17g04100.t1;Amborella_trichopoda|XP_006828988.1;Solanum_lycopersicum|XP_004232744.1;Vitis_vinifera|XP_002267539.1;Oryza_sativa|XP_015648728.1;Arabidopsis_thaliana|NP_176371.1;Salvia_milt…
cluster13144	11	O23016	GO:0034765; P:regulation of ion transmembrane transport; IEA:UniProtKB-KW	Arabidopsis_thaliana|NP_171963.1;Coffea_canephora|CDO99406.1;Leonurus_japonicus|GWHPBQCV025113_mRNA=GWHTBQCV025113_Gene=GWHGBQCV025113_Position=GWHBQCV00000008:;Theobroma_cacao|XP_007034459.2;Tectona_grandis|Tg04g11590.t1;Amborella_trichopoda|XP_006854406.1;Solanum_lycopersicum|XP_004253006.1;Clinopodium_gracile|Clgra_038447-T1;Vitis_vinifera|XP_002285645.1;Oryza_sativa|XP_015626381.1;Salvia_milt…
cluster13145	11	P48627	GO:0006636; P:unsaturated fatty acid biosynthetic process; IEA:UniProtKB-UniPathway	Arabidopsis_thaliana|NP_194824.1;Coffea_canephora|CDP10222.1;Leonurus_japonicus|GWHPBQCV027138_mRNA=GWHTBQCV027138_Gene=GWHGBQCV027138_Position=GWHBQCV00000009:;Theobroma_cacao|XP_017983888.1;Tectona_grandis|Tg02g02120.t1;Amborella_trichopoda|XP_006857220.1;Solanum_lycopersicum|NP_001317649.1;Clinopodium_gracile|Clgra_019351-T1;Vitis_vinifera|XP_003634863.1;Oryza_sativa|XP_015650253.1;Salvia_milt…
cluster13147	11	Q9ZVL6	GO:0010206; P:photosystem II repair; IMP:TAIR	Arabidopsis_thaliana|NP_564667.1;Coffea_canephora|CDP17964.1;Leonurus_japonicus|GWHPBQCV022229_mRNA=GWHTBQCV022229_Gene=GWHGBQCV022229_Position=GWHBQCV00000007:;Theobroma_cacao|XP_007030928.2;Tectona_grandis|Tg09g01800.t1;Amborella_trichopoda|XP_006850823.1;Solanum_lycopersicum|XP_004230168.1;Clinopodium_gracile|Clgra_034691-T1;Vitis_vinifera|XP_002284939.1;Oryza_sativa|XP_015640458.1;Salvia_milt…
cluster13152	11	Q9SJ85	GO:0016567; P:protein ubiquitination; IEA:UniProtKB-UniPathway	Tectona_grandis|Tg13g00090.t1;Arabidopsis_thaliana|NP_178551.2;Coffea_canephora|CDP00890.1;Leonurus_japonicus|GWHPBQCV026311_mRNA=GWHTBQCV026311_Gene=GWHGBQCV026311_Position=GWHBQCV00000009:;Theobroma_cacao|XP_007049232.2;Amborella_trichopoda|XP_011627951.1;Solanum_lycopersicum|XP_004243500.1;Clinopodium_gracile|Clgra_001758-T1;Vitis_vinifera|XP_010657194.1;Oryza_sativa|XP_015644289.1;Salvia_milt…
cluster13155	11	Q94HF1	GO:0006446; P:regulation of translational initiation; IEA:InterPro	Arabidopsis_thaliana|NP_195051.1;Coffea_canephora|CDP03033.1;Leonurus_japonicus|GWHPBQCV005050_mRNA=GWHTBQCV005050_Gene=GWHGBQCV005050_Position=GWHBQCV00000010:;Theobroma_cacao|XP_007012542.2;Tectona_grandis|Tg01g10810.t1;Amborella_trichopoda|XP_006838090.1;Solanum_lycopersicum|XP_004243678.1;Clinopodium_gracile|Clgra_022691-T1;Vitis_vinifera|XP_002274986.1;Oryza_sativa|XP_015632276.1;Salvia_milt…
cluster13156	11	Q9LF41	GO:0030433; P:ubiquitin-dependent ERAD pathway; IBA:GO_Central	Arabidopsis_thaliana|NP_568313.2;Coffea_canephora|CDP02278.1;Leonurus_japonicus|GWHPBQCV023922_mRNA=GWHTBQCV023922_Gene=GWHGBQCV023922_Position=GWHBQCV00000007:;Theobroma_cacao|XP_007032650.2;Tectona_grandis|Tg09g16240.t2;Amborella_trichopoda|XP_011625050.1;Solanum_lycopersicum|XP_004232186.1;Clinopodium_gracile|Clgra_035338-T1;Vitis_vinifera|XP_003633847.1;Oryza_sativa|XP_015631507.1;Salvia_milt…
cluster13161	11	Q9ZP40	GO:0009507; C:chloroplast; IEA:UniProtKB-SubCell	Arabidopsis_thaliana|NP_181092.1;Coffea_canephora|CDP18539.1;Leonurus_japonicus|GWHPBQCV023738_mRNA=GWHTBQCV023738_Gene=GWHGBQCV023738_Position=GWHBQCV00000007:;Theobroma_cacao|XP_017973328.1;Tectona_grandis|Tg19g03330.t1;Amborella_trichopoda|XP_006854055.1;Solanum_lycopersicum|XP_004245973.1;Clinopodium_gracile|Clgra_032292-T1;Vitis_vinifera|XP_002276479.1;Oryza_sativa|XP_015614073.1;Salvia_milt…
cluster13162	11	A3M0J3	GO:0008168; F:methyltransferase activity; IEA:UniProtKB-KW	Arabidopsis_thaliana|NP_173998.2;Coffea_canephora|CDP00361.1;Leonurus_japonicus|GWHPBQCV028225_mRNA=GWHTBQCV028225_Gene=GWHGBQCV028225_Position=GWHBQCV00000009:;Theobroma_cacao|XP_007046030.2;Tectona_grandis|Tg15g11040.t1;Amborella_trichopoda|XP_006827316.1;Solanum_lycopersicum|XP_010320689.1;Clinopodium_gracile|Clgra_031862-T1;Vitis_vinifera|XP_010655344.2;Oryza_sativa|XP_015630012.1;Salvia_milt…
cluster13166	11	O64668	GO:0016485; P:protein processing; IEA:InterPro	Arabidopsis_thaliana|NP_172346.1;Coffea_canephora|CDP20662.1;Leonurus_japonicus|GWHPBQCV004622_mRNA=GWHTBQCV004622_Gene=GWHGBQCV004622_Position=GWHBQCV00000010:;Theobroma_cacao|XP_007029924.2;Tectona_grandis|Tg01g05020.t1;Amborella_trichopoda|XP_006829799.1;Solanum_lycopersicum|XP_004249348.1;Clinopodium_gracile|Clgra_023179-T1;Vitis_vinifera|XP_002267364.1;Oryza_sativa|XP_015611196.1;Salvia_milt…
cluster13167	11	P10708	GO:0009416; P:response to light stimulus; IBA:GO_Central	Arabidopsis_thaliana|NP_191706.2;Coffea_canephora|CDP13340.1;Leonurus_japonicus|GWHPBQCV007211_mRNA=GWHTBQCV007211_Gene=GWHGBQCV007211_Position=GWHBQCV00000002:;Theobroma_cacao|XP_007044017.1;Tectona_grandis|Tg15g03790.t1;Amborella_trichopoda|XP_006848348.1;Solanum_lycopersicum|NP_001296176.1;Clinopodium_gracile|Clgra_017435-T1;Vitis_vinifera|XP_010655886.1;Oryza_sativa|XP_015647391.1;Salvia_milt…
cluster13169	11	A8KYS5	GO:0006098; P:pentose-phosphate shunt; IEA:UniProtKB-UniRule	Arabidopsis_thaliana|NP_196846.1;Coffea_canephora|CDP18990.1;Leonurus_japonicus|GWHPBQCV007127_mRNA=GWHTBQCV007127_Gene=GWHGBQCV007127_Position=GWHBQCV00000002:;Theobroma_cacao|XP_007043770.2;Tectona_grandis|Tg15g04670.t1;Amborella_trichopoda|XP_006844452.1;Solanum_lycopersicum|NP_001234354.2;Clinopodium_gracile|Clgra_017262-T1;Vitis_vinifera|XP_002271514.1;Oryza_sativa|XP_015617463.1;Salvia_milt…
cluster13172	11	Q0V7R1	GO:0045489; P:pectin biosynthetic process; IEA:UniProtKB-UniPathway	Arabidopsis_thaliana|NP_563925.1;Coffea_canephora|CDP00576.1;Leonurus_japonicus|GWHPBQCV028395_mRNA=GWHTBQCV028395_Gene=GWHGBQCV028395_Position=GWHBQCV00000009:;Theobroma_cacao|XP_007016224.1;Tectona_grandis|Tg15g12980.t1;Amborella_trichopoda|XP_006843824.1;Solanum_lycopersicum|XP_004238964.1;Clinopodium_gracile|Clgra_032083-T1;Vitis_vinifera|XP_002281658.1;Salvia_miltiorrhiza|XP_057765729.1;Oryz…
cluster13173	11	Q9STF3	GO:0009451; P:RNA modification; IBA:GO_Central	Arabidopsis_thaliana|NP_190263.1;Coffea_canephora|CDP09112.1;Leonurus_japonicus|GWHPBQCV007665_mRNA=GWHTBQCV007665_Gene=GWHGBQCV007665_Position=GWHBQCV00000002:;Theobroma_cacao|XP_007016304.2;Tectona_grandis|Tg14g07720.t1;Amborella_trichopoda|XP_011625940.1;Solanum_lycopersicum|XP_004250510.1;Clinopodium_gracile|Clgra_016519-T1;Vitis_vinifera|XP_002280428.1;Oryza_sativa|XP_015622204.1;Salvia_milt…
cluster13175	11	Q9C5W0	GO:0019432; P:triglyceride biosynthetic process; IMP:TAIR	Arabidopsis_thaliana|NP_175264.3;Coffea_canephora|CDO98685.1;Leonurus_japonicus|GWHPBQCV001739_mRNA=GWHTBQCV001739_Gene=GWHGBQCV001739_Position=GWHBQCV00000001:;Theobroma_cacao|XP_017983559.1;Tectona_grandis|Tg17g02540.t1;Amborella_trichopoda|XP_006840357.1;Solanum_lycopersicum|XP_004252959.1;Clinopodium_gracile|Clgra_016095-T1;Vitis_vinifera|XP_002269582.1;Oryza_sativa|XP_015639415.1;Salvia_milt…
cluster13176	11	P82195	GO:0006412; P:translation; IEA:InterPro	Arabidopsis_thaliana|NP_175268.1;Coffea_canephora|CDP18513.1;Leonurus_japonicus|GWHPBQCV021609_mRNA=GWHTBQCV021609_Gene=GWHGBQCV021609_Position=GWHBQCV00000007:;Theobroma_cacao|XP_007014073.2;Tectona_grandis|Tg05g14430.t1;Amborella_trichopoda|XP_006848386.2;Solanum_lycopersicum|XP_004252957.1;Clinopodium_gracile|Clgra_016542-T1;Vitis_vinifera|XP_002270819.1;Oryza_sativa|XP_015630413.1;Salvia_milt…
cluster13178	11	Q8H183	GO:0006212; P:uracil catabolic process; IMP:TAIR	Arabidopsis_thaliana|NP_201242.2;Coffea_canephora|CDO97386.1;Leonurus_japonicus|GWHPBQCV021383_mRNA=GWHTBQCV021383_Gene=GWHGBQCV021383_Position=GWHBQCV00000007:;Theobroma_cacao|XP_007042835.2;Tectona_grandis|Tg12g10060.t1;Amborella_trichopoda|XP_006852933.1;Solanum_lycopersicum|XP_004248793.1;Clinopodium_gracile|Clgra_027104-T1;Vitis_vinifera|XP_002268313.1;Oryza_sativa|XP_015647908.1;Salvia_milt…
cluster13181	11	Q9SGS4	GO:0009414; P:response to water deprivation; TAS:UniProtKB	Arabidopsis_thaliana|NP_177735.1;Coffea_canephora|CDP07342.1;Leonurus_japonicus|GWHPBQCV018909_mRNA=GWHTBQCV018909_Gene=GWHGBQCV018909_Position=GWHBQCV00000006:;Theobroma_cacao|XP_007017913.2;Tectona_grandis|Tg03g04350.t1;Amborella_trichopoda|XP_006828837.1;Solanum_lycopersicum|XP_004238392.1;Clinopodium_gracile|Clgra_036830-T1;Vitis_vinifera|XP_002285902.1;Oryza_sativa|XP_015646731.1;Salvia_milt…
cluster13184	11	A0LQM1	GO:0070475; P:rRNA base methylation; IEA:UniProtKB-UniRule	Arabidopsis_thaliana|NP_188597.1;Coffea_canephora|CDO97279.1;Leonurus_japonicus|GWHPBQCV021286_mRNA=GWHTBQCV021286_Gene=GWHGBQCV021286_Position=GWHBQCV00000007:;Theobroma_cacao|XP_007042641.2;Tectona_grandis|Tg12g11790.t3;Amborella_trichopoda|XP_006841076.2;Solanum_lycopersicum|XP_004230694.1;Clinopodium_gracile|Clgra_005823-T1;Vitis_vinifera|XP_002265287.1;Oryza_sativa|XP_015628791.1;Salvia_milt…
cluster13185	11	O64642	GO:0071076; P:RNA 3' uridylation; IDA:UniProtKB	Arabidopsis_thaliana|NP_566048.1;Coffea_canephora|CDP20563.1;Leonurus_japonicus|GWHPBQCV003737_mRNA=GWHTBQCV003737_Gene=GWHGBQCV003737_Position=GWHBQCV00000010:;Theobroma_cacao|XP_007051991.2;Tectona_grandis|Tg06g03100.t2;Amborella_trichopoda|XP_006829140.1;Solanum_lycopersicum|XP_004229872.1;Clinopodium_gracile|Clgra_025304-T1;Vitis_vinifera|XP_010661598.1;Oryza_sativa|XP_015614651.1;Salvia_milt…
cluster13187	11	Q9SJZ3	GO:0009451; P:RNA modification; IBA:GO_Central	Arabidopsis_thaliana|NP_179827.1;Coffea_canephora|CDP20154.1;Leonurus_japonicus|GWHPBQCV003926_mRNA=GWHTBQCV003926_Gene=GWHGBQCV003926_Position=GWHBQCV00000010:;Theobroma_cacao|XP_007014996.2;Tectona_grandis|Tg18g09560.t1;Amborella_trichopoda|XP_011622619.1;Solanum_lycopersicum|XP_004250876.1;Clinopodium_gracile|Clgra_016455-T1;Vitis_vinifera|XP_010651252.2;Oryza_sativa|XP_025876391.1;Salvia_milt…
cluster13190	11	Q9SEC2	GO:0008113; F:peptide-methionine (S)-S-oxide reductase activity; IEA:UniProtKB-EC	Arabidopsis_thaliana|NP_194243.1;Coffea_canephora|CDP05390.1;Leonurus_japonicus|GWHPBQCV006268_mRNA=GWHTBQCV006268_Gene=GWHGBQCV006268_Position=GWHBQCV00000002:;Theobroma_cacao|XP_007038245.1;Tectona_grandis|Tg12g07780.t1;Amborella_trichopoda|XP_006838578.1;Solanum_lycopersicum|NP_001307972.1;Clinopodium_gracile|Clgra_014121-T1;Vitis_vinifera|XP_002281325.1;Oryza_sativa|XP_015614143.1;Salvia_milt…
cluster13191	11	Q9STT1	GO:0004842; F:ubiquitin-protein transferase activity; IEA:InterPro	Arabidopsis_thaliana|NP_849613.1;Coffea_canephora|CDP17287.1;Leonurus_japonicus|GWHPBQCV026872_mRNA=GWHTBQCV026872_Gene=GWHGBQCV026872_Position=GWHBQCV00000009:;Theobroma_cacao|XP_007010933.1;Tectona_grandis|Tg06g08670.t1;Amborella_trichopoda|XP_006854830.1;Solanum_lycopersicum|XP_004230032.1;Clinopodium_gracile|Clgra_026481-T1;Vitis_vinifera|XP_002264402.1;Oryza_sativa|XP_015632524.1;Salvia_milt…
cluster13192	11	Q9LRN8	GO:0006412; P:translation; IEA:InterPro	Arabidopsis_thaliana|NP_566579.1;Coffea_canephora|CDO98694.1;Leonurus_japonicus|GWHPBQCV024200_mRNA=GWHTBQCV024200_Gene=GWHGBQCV024200_Position=GWHBQCV00000008:;Theobroma_cacao|XP_007035988.2;Tectona_grandis|Tg04g00090.t1;Amborella_trichopoda|XP_006840336.1;Solanum_lycopersicum|XP_004235910.1;Clinopodium_gracile|Clgra_036703-T1;Vitis_vinifera|XP_002268657.1;Oryza_sativa|XP_015617381.1;Salvia_milt…
cluster13194	11	Q682H0	GO:0016021; C:integral component of membrane; IEA:UniProtKB-KW	Arabidopsis_thaliana|NP_181810.2;Coffea_canephora|CDP18726.1;Leonurus_japonicus|GWHPBQCV002159_mRNA=GWHTBQCV002159_Gene=GWHGBQCV002159_Position=GWHBQCV00000001:;Theobroma_cacao|XP_007048822.2;Tectona_grandis|Tg13g04450.t1;Amborella_trichopoda|XP_006852689.1;Solanum_lycopersicum|XP_004248208.1;Clinopodium_gracile|Clgra_002858-T1;Vitis_vinifera|XP_002279952.1;Oryza_sativa|XP_015631839.1;Salvia_milt…
cluster13195	11	Q8LFQ6	GO:0034599; P:cellular response to oxidative stress; IBA:GO_Central	Arabidopsis_thaliana|NP_197550.1;Coffea_canephora|CDP03012.1;Leonurus_japonicus|GWHPBQCV004679_mRNA=GWHTBQCV004679_Gene=GWHGBQCV004679_Position=GWHBQCV00000010:;Theobroma_cacao|XP_007014498.1;Tectona_grandis|Tg01g05660.t1;Amborella_trichopoda|XP_006845740.2;Solanum_lycopersicum|XP_004251165.1;Clinopodium_gracile|Clgra_023103-T1;Vitis_vinifera|XP_002266525.1;Oryza_sativa|XP_015641379.1;Salvia_milt…
cluster13196	11	Q9XF57	GO:0006625; P:protein targeting to peroxisome; IMP:TAIR	Arabidopsis_thaliana|NP_174220.1;Coffea_canephora|CDO96800.1;Leonurus_japonicus|GWHPBQCV003027_mRNA=GWHTBQCV003027_Gene=GWHGBQCV003027_Position=GWHBQCV00000001:;Theobroma_cacao|XP_007025371.1;Tectona_grandis|Tg02g16360.t1;Amborella_trichopoda|XP_006855350.1;Solanum_lycopersicum|NP_001234299.2;Clinopodium_gracile|Clgra_005187-T1;Vitis_vinifera|XP_002272882.1;Oryza_sativa|XP_015624658.1;Salvia_milt…
cluster13198	11	P58992	GO:0005506; F:iron ion binding; IEA:InterPro	Arabidopsis_thaliana|NP_175852.1;Coffea_canephora|CDP08579.1;Leonurus_japonicus|GWHPBQCV020154_mRNA=GWHTBQCV020154_Gene=GWHGBQCV020154_Position=GWHBQCV00000006:;Theobroma_cacao|XP_007030644.2;Tectona_grandis|Tg07g11590.t1;Amborella_trichopoda|XP_006840366.1;Solanum_lycopersicum|XP_004230127.1;Clinopodium_gracile|Clgra_009923-T1;Vitis_vinifera|XP_002276406.1;Oryza_sativa|XP_015648803.1;Salvia_milt…
cluster13199	11	Q8RWH8	GO:0015693; P:magnesium ion transport; ISS:UniProtKB	Arabidopsis_thaliana|NP_196757.2;Coffea_canephora|CDP08288.1;Leonurus_japonicus|GWHPBQCV009010_mRNA=GWHTBQCV009010_Gene=GWHGBQCV009010_Position=GWHBQCV00000003:;Theobroma_cacao|XP_007012321.2;Tectona_grandis|Tg05g01300.t1;Amborella_trichopoda|XP_006853889.1;Solanum_lycopersicum|XP_004240702.1;Clinopodium_gracile|Clgra_023703-T1;Vitis_vinifera|XP_002278242.1;Oryza_sativa|XP_015648882.1;Salvia_milt…
cluster13200	11	N/A	N/A	Arabidopsis_thaliana|NP_568342.1;Coffea_canephora|CDP04950.1;Leonurus_japonicus|GWHPBQCV005954_mRNA=GWHTBQCV005954_Gene=GWHGBQCV005954_Position=GWHBQCV00000002:;Theobroma_cacao|XP_017977809.1;Tectona_grandis|Tg06g17220.t3;Amborella_trichopoda|XP_006854166.1;Solanum_lycopersicum|XP_004235309.1;Clinopodium_gracile|Clgra_033011-T1;Vitis_vinifera|XP_002275188.2;Oryza_sativa|XP_015648775.1;Salvia_milt…
cluster13201	11	O82504	GO:0030422; P:production of siRNA involved in RNA interference; IMP:TAIR	Arabidopsis_thaliana|NP_192851.1;Coffea_canephora|CDP19325.1;Leonurus_japonicus|GWHPBQCV010573_mRNA=GWHTBQCV010573_Gene=GWHGBQCV010573_Position=GWHBQCV00000003:;Theobroma_cacao|XP_007036161.2;Tectona_grandis|Tg10g04070.t1;Amborella_trichopoda|XP_006836643.1;Solanum_lycopersicum|XP_004236120.1;Clinopodium_gracile|Clgra_027869-T1;Vitis_vinifera|XP_002280099.1;Oryza_sativa|XP_015636884.1;Salvia_milt…
cluster13203	11	Q8RWU5	GO:0006511; P:ubiquitin-dependent protein catabolic process; IBA:GO_Central	Arabidopsis_thaliana|NP_568502.1;Coffea_canephora|CDP17210.1;Leonurus_japonicus|GWHPBQCV016935_mRNA=GWHTBQCV016935_Gene=GWHGBQCV016935_Position=GWHBQCV00000005:;Theobroma_cacao|XP_007031048.2;Tectona_grandis|Tg06g10170.t1;Amborella_trichopoda|XP_006841502.1;Solanum_lycopersicum|XP_010313225.1;Clinopodium_gracile|Clgra_026726-T1;Vitis_vinifera|XP_010659653.1;Oryza_sativa|XP_015620314.1;Salvia_milt…
cluster13204	11	N/A	N/A	Arabidopsis_thaliana|NP_680733.1;Coffea_canephora|CDP17922.1;Leonurus_japonicus|GWHPBQCV001306_mRNA=GWHTBQCV001306_Gene=GWHGBQCV001306_Position=GWHBQCV00000001:;Theobroma_cacao|XP_017978775.1;Tectona_grandis|Tg17g03530.t1;Amborella_trichopoda|XP_006841849.1;Solanum_lycopersicum|XP_010327230.1;Clinopodium_gracile|Clgra_016181-T1;Vitis_vinifera|XP_010646355.1;Oryza_sativa|XP_015635672.1;Salvia_milt…
cluster13205	11	Q9M8T0	GO:0009737; P:response to abscisic acid; IDA:TAIR	Arabidopsis_thaliana|NP_199420.1;Coffea_canephora|CDO99487.1;Leonurus_japonicus|GWHPBQCV003091_mRNA=GWHTBQCV003091_Gene=GWHGBQCV003091_Position=GWHBQCV00000001:;Theobroma_cacao|XP_007025531.2;Tectona_grandis|Tg02g15530.t1;Amborella_trichopoda|XP_006852578.1;Solanum_lycopersicum|XP_004248119.1;Clinopodium_gracile|Clgra_005111-T1;Vitis_vinifera|XP_010655460.1;Salvia_miltiorrhiza|XP_057764428.1;Oryz…
cluster13207	11	Q9XYL0	GO:0006972; P:hyperosmotic response; IEP:dictyBase	Arabidopsis_thaliana|NP_199382.1;Coffea_canephora|CDO96877.1;Leonurus_japonicus|GWHPBQCV001635_mRNA=GWHTBQCV001635_Gene=GWHGBQCV001635_Position=GWHBQCV00000001:;Theobroma_cacao|XP_017978151.1;Tectona_grandis|Tg17g01710.t1;Amborella_trichopoda|XP_006847786.1;Solanum_lycopersicum|XP_004233068.1;Clinopodium_gracile|Clgra_016011-T1;Vitis_vinifera|XP_002264996.1;Oryza_sativa|XP_015638884.1;Salvia_milt…
cluster13208	11	Q9LEU8	GO:0042450; P:arginine biosynthetic process via ornithine; IBA:GO_Central	Arabidopsis_thaliana|NP_196653.1;Coffea_canephora|CDP11505.1;Leonurus_japonicus|GWHPBQCV021600_mRNA=GWHTBQCV021600_Gene=GWHGBQCV021600_Position=GWHBQCV00000007:;Theobroma_cacao|XP_007018228.1;Tectona_grandis|Tg05g14350.t2;Amborella_trichopoda|XP_006852932.1;Solanum_lycopersicum|NP_001316165.1;Clinopodium_gracile|Clgra_016330-T1;Vitis_vinifera|XP_002283809.1;Oryza_sativa|XP_015632553.1;Salvia_milt…
cluster13211	11	Q197W8	GO:0009524; C:phragmoplast; IEA:UniProtKB-SubCell	Arabidopsis_thaliana|NP_187184.2;Coffea_canephora|CDP18098.1;Leonurus_japonicus|GWHPBQCV020883_mRNA=GWHTBQCV020883_Gene=GWHGBQCV020883_Position=GWHBQCV00000007:;Theobroma_cacao|XP_007030847.1;Tectona_grandis|Tg08g12360.t1;Amborella_trichopoda|XP_020526808.1;Solanum_lycopersicum|XP_004231277.1;Clinopodium_gracile|Clgra_011223-T1;Vitis_vinifera|XP_002284730.2;Oryza_sativa|XP_015624864.1;Salvia_milt…
cluster13212	11	Q94A43	GO:0006351; P:transcription, DNA-templated; IEA:InterPro	Vitis_vinifera|XP_002273547.1;Leonurus_japonicus|GWHPBQCV020054_mRNA=GWHTBQCV020054_Gene=GWHGBQCV020054_Position=GWHBQCV00000006:;Arabidopsis_thaliana|NP_190644.1;Oryza_sativa|XP_015645123.1;Salvia_miltiorrhiza|XP_057809555.1;Coffea_canephora|CDP02805.1;Theobroma_cacao|XP_007047018.2;Tectona_grandis|Tg07g10100.t1;Solanum_lycopersicum|XP_004233505.1;Clinopodium_gracile|Clgra_027336-T1;Amborella_tr…
cluster13213	11	Q9LR69	GO:0009451; P:RNA modification; IBA:GO_Central	Arabidopsis_thaliana|NP_171853.1;Coffea_canephora|CDP14719.1;Leonurus_japonicus|GWHPBQCV005149_mRNA=GWHTBQCV005149_Gene=GWHGBQCV005149_Position=GWHBQCV00000010:;Theobroma_cacao|XP_007043513.2;Tectona_grandis|Tg17g13440.t1;Amborella_trichopoda|XP_006841755.1;Solanum_lycopersicum|XP_004248468.3;Clinopodium_gracile|Clgra_032619-T1;Vitis_vinifera|XP_002272819.1;Oryza_sativa|XP_015643920.1;Salvia_milt…
cluster13215	11	Q93YU8	GO:1901698; P:response to nitrogen compound; IEP:TAIR	Arabidopsis_thaliana|NP_197941.1;Coffea_canephora|CDP18480.1;Leonurus_japonicus|GWHPBQCV009719_mRNA=GWHTBQCV009719_Gene=GWHGBQCV009719_Position=GWHBQCV00000003:;Theobroma_cacao|XP_017983187.1;Tectona_grandis|Tg16g01530.t1;Amborella_trichopoda|XP_006826988.1;Solanum_lycopersicum|XP_004245249.1;Clinopodium_gracile|Clgra_001492-T1;Vitis_vinifera|XP_002281782.1;Oryza_sativa|XP_015637799.1;Salvia_milt…
cluster13216	11	P46547	GO:0004177; F:aminopeptidase activity; IEA:UniProtKB-KW	Arabidopsis_thaliana|NP_191713.1;Coffea_canephora|CDP08757.1;Leonurus_japonicus|GWHPBQCV003599_mRNA=GWHTBQCV003599_Gene=GWHGBQCV003599_Position=GWHBQCV00000010:;Theobroma_cacao|XP_007051700.2;Tectona_grandis|Tg06g01540.t2;Amborella_trichopoda|XP_006843370.1;Solanum_lycopersicum|NP_001334094.1;Clinopodium_gracile|Clgra_025075-T1;Vitis_vinifera|XP_002275513.1;Oryza_sativa|XP_015642969.1;Salvia_milt…
cluster13217	11	Q9LS40	GO:0009627; P:systemic acquired resistance; IMP:TAIR	Arabidopsis_thaliana|NP_173922.1;Coffea_canephora|CDP20336.1;Leonurus_japonicus|GWHPBQCV028404_mRNA=GWHTBQCV028404_Gene=GWHGBQCV028404_Position=GWHBQCV00000009:;Theobroma_cacao|XP_017971928.1;Tectona_grandis|Tg15g13050.t1;Amborella_trichopoda|XP_006843768.1;Solanum_lycopersicum|XP_004238952.1;Clinopodium_gracile|Clgra_032091-T1;Vitis_vinifera|XP_002281973.1;Oryza_sativa|XP_015626594.1;Salvia_milt…
cluster13218	11	O23474	GO:0006979; P:response to oxidative stress; IEA:InterPro	Arabidopsis_thaliana|NP_193362.3;Coffea_canephora|CDO98747.1;Theobroma_cacao|XP_017975223.1;Tectona_grandis|Tg08g00550.t1;Amborella_trichopoda|XP_006856547.3;Solanum_lycopersicum|XP_025886169.1;Clinopodium_gracile|Clgra_028595-T1;Vitis_vinifera|XP_002273359.1;Oryza_sativa|XP_015648952.1;Salvia_miltiorrhiza|XP_057806106.1;Leonurus_japonicus|GWHPBQCV005723_mRNA=GWHTBQCV005723_Gene=GWHGBQCV005723_Po…
cluster13219	11	P29344	GO:0003723; F:RNA binding; IEA:UniProtKB-KW	Arabidopsis_thaliana|NP_850903.1;Coffea_canephora|CDO98727.1;Leonurus_japonicus|GWHPBQCV024226_mRNA=GWHTBQCV024226_Gene=GWHGBQCV024226_Position=GWHBQCV00000008:;Theobroma_cacao|XP_017975185.1;Tectona_grandis|Tg04g00340.t1;Amborella_trichopoda|XP_006841606.1;Solanum_lycopersicum|XP_004229034.1;Clinopodium_gracile|Clgra_036681-T1;Vitis_vinifera|XP_002280604.1;Oryza_sativa|XP_015628466.1;Salvia_milt…
cluster13223	11	A7RK30	GO:0016491; F:oxidoreductase activity; IEA:UniProtKB-KW	Arabidopsis_thaliana|NP_191205.1;Coffea_canephora|CDP13874.1;Leonurus_japonicus|GWHPBQCV025649_mRNA=GWHTBQCV025649_Gene=GWHGBQCV025649_Position=GWHBQCV00000008:;Theobroma_cacao|XP_007011411.2;Tectona_grandis|Tg15g02100.t2;Amborella_trichopoda|XP_006842596.1;Solanum_lycopersicum|XP_004235213.1;Clinopodium_gracile|Clgra_000783-T1;Vitis_vinifera|XP_002267177.1;Oryza_sativa|XP_015640528.1;Salvia_milt…
cluster13227	11	N/A	N/A	Arabidopsis_thaliana|NP_177267.2;Coffea_canephora|CDP00730.1;Leonurus_japonicus|GWHPBQCV026203_mRNA=GWHTBQCV026203_Gene=GWHGBQCV026203_Position=GWHBQCV00000008:;Theobroma_cacao|XP_017971787.1;Tectona_grandis|Tg15g14290.t1;Amborella_trichopoda|XP_006837216.1;Solanum_lycopersicum|XP_004238862.1;Clinopodium_gracile|Clgra_032212-T1;Vitis_vinifera|XP_002280363.3;Oryza_sativa|XP_015640859.1;Salvia_milt…
cluster13228	11	Q9SGH4	GO:0009767; P:photosynthetic electron transport chain; IMP:TAIR	Arabidopsis_thaliana|NP_566137.1;Coffea_canephora|CDP05807.1;Leonurus_japonicus|GWHPBQCV001818_mRNA=GWHTBQCV001818_Gene=GWHGBQCV001818_Position=GWHBQCV00000001:;Theobroma_cacao|XP_007021089.2;Tectona_grandis|Tg02g06680.t1;Amborella_trichopoda|XP_006837007.2;Solanum_lycopersicum|XP_004248376.1;Clinopodium_gracile|Clgra_004012-T1;Vitis_vinifera|XP_002282744.1;Oryza_sativa|XP_015644740.1;Salvia_milt…
cluster13229	11	N/A	N/A	Arabidopsis_thaliana|NP_188174.4;Coffea_canephora|CDO98095.1;Leonurus_japonicus|GWHPBQCV003818_mRNA=GWHTBQCV003818_Gene=GWHGBQCV003818_Position=GWHBQCV00000010:;Theobroma_cacao|XP_007023978.2;Tectona_grandis|Tg06g04300.t1;Amborella_trichopoda|XP_020517490.1;Solanum_lycopersicum|XP_010318582.1;Clinopodium_gracile|Clgra_025443-T1;Vitis_vinifera|XP_010654724.1;Oryza_sativa|XP_015622610.1;Salvia_milt…
cluster13231	11	N/A	N/A	Arabidopsis_thaliana|NP_192118.1;Coffea_canephora|CDP17080.1;Leonurus_japonicus|GWHPBQCV008712_mRNA=GWHTBQCV008712_Gene=GWHGBQCV008712_Position=GWHBQCV00000002:;Theobroma_cacao|XP_007051081.2;Tectona_grandis|Tg14g15190.t1;Amborella_trichopoda|XP_006855290.2;Solanum_lycopersicum|XP_004229400.1;Clinopodium_gracile|Clgra_030998-T1;Vitis_vinifera|XP_002275655.1;Oryza_sativa|XP_015629197.1;Salvia_milt…
cluster13233	11	Q15427	GO:0000375; P:RNA splicing, via transesterification reactions; TAS:ProtInc	Arabidopsis_thaliana|NP_179441.1;Coffea_canephora|CDP02822.1;Leonurus_japonicus|GWHPBQCV020045_mRNA=GWHTBQCV020045_Gene=GWHGBQCV020045_Position=GWHBQCV00000006:;Theobroma_cacao|XP_007046986.2;Tectona_grandis|Tg07g10020.t1;Amborella_trichopoda|XP_006856079.1;Solanum_lycopersicum|XP_004235773.1;Clinopodium_gracile|Clgra_027355-T1;Vitis_vinifera|XP_002271291.1;Oryza_sativa|XP_015614791.1;Salvia_milt…
cluster13234	11	Q9LDY5	GO:0003755; F:peptidyl-prolyl cis-trans isomerase activity; IEA:UniProtKB-KW	Arabidopsis_thaliana|NP_564048.1;Coffea_canephora|CDO98358.1;Leonurus_japonicus|GWHPBQCV010874_mRNA=GWHTBQCV010874_Gene=GWHGBQCV010874_Position=GWHBQCV00000003:;Theobroma_cacao|XP_007036779.2;Tectona_grandis|Tg10g09300.t1;Amborella_trichopoda|XP_006838033.1;Solanum_lycopersicum|XP_004235794.1;Clinopodium_gracile|Clgra_007738-T1;Vitis_vinifera|XP_003634204.1;Oryza_sativa|XP_015631550.1;Salvia_milt…
cluster13236	11	O22265	GO:0009644; P:response to high light intensity; IEP:TAIR	Arabidopsis_thaliana|NP_566101.1;Coffea_canephora|CDP10934.1;Leonurus_japonicus|GWHPBQCV021461_mRNA=GWHTBQCV021461_Gene=GWHGBQCV021461_Position=GWHBQCV00000007:;Theobroma_cacao|XP_017972011.1;Tectona_grandis|Tg05g12690.t1;Amborella_trichopoda|XP_006829166.1;Solanum_lycopersicum|XP_010316268.1;Clinopodium_gracile|Clgra_024602-T1;Vitis_vinifera|XP_002282206.1;Oryza_sativa|XP_015629751.1;Salvia_milt…
cluster13238	11	N/A	N/A	Arabidopsis_thaliana|NP_176702.2;Coffea_canephora|CDP04190.1;Leonurus_japonicus|GWHPBQCV006697_mRNA=GWHTBQCV006697_Gene=GWHGBQCV006697_Position=GWHBQCV00000002:;Theobroma_cacao|XP_007029284.2;Tectona_grandis|Tg12g00480.t1;Amborella_trichopoda|XP_011624493.1;Solanum_lycopersicum|XP_004237375.1;Clinopodium_gracile|Clgra_019050-T1;Vitis_vinifera|XP_002277168.1;Oryza_sativa|XP_015628385.1;Salvia_milt…
cluster13239	11	O04200	GO:0044375; P:regulation of peroxisome size; IMP:TAIR	Arabidopsis_thaliana|NP_181526.1;Coffea_canephora|CDP14058.1;Theobroma_cacao|XP_007009088.1;Tectona_grandis|Tg07g04670.t3;Amborella_trichopoda|XP_006848127.1;Solanum_lycopersicum|XP_004239938.1;Clinopodium_gracile|Clgra_014030-T1;Vitis_vinifera|XP_010658473.1;Oryza_sativa|XP_015628226.1;Salvia_miltiorrhiza|XP_057788926.1;Leonurus_japonicus|GWHPBQCV025784_mRNA=GWHTBQCV025784_Gene=GWHGBQCV025784_Po…
cluster13243	11	Q9STF2	GO:0007623; P:circadian rhythm; IEP:TAIR	Arabidopsis_thaliana|NP_566886.2;Coffea_canephora|CDP09104.1;Leonurus_japonicus|GWHPBQCV007660_mRNA=GWHTBQCV007660_Gene=GWHGBQCV007660_Position=GWHBQCV00000002:;Theobroma_cacao|XP_007016331.2;Tectona_grandis|Tg14g07670.t1;Amborella_trichopoda|XP_006846338.1;Solanum_lycopersicum|XP_004240374.1;Clinopodium_gracile|Clgra_016526-T1;Vitis_vinifera|XP_019076105.1;Oryza_sativa|XP_015640848.1;Salvia_milt…
cluster13245	11	O48716	GO:0009846; P:pollen germination; IDA:TAIR	Arabidopsis_thaliana|NP_190761.1;Coffea_canephora|CDP16445.1;Leonurus_japonicus|GWHPBQCV004096_mRNA=GWHTBQCV004096_Gene=GWHGBQCV004096_Position=GWHBQCV00000010:;Theobroma_cacao|XP_007008790.2;Tectona_grandis|Tg06g08240.t1;Amborella_trichopoda|XP_020522205.1;Solanum_lycopersicum|XP_004229169.1;Clinopodium_gracile|Clgra_026399-T1;Vitis_vinifera|XP_002268927.2;Oryza_sativa|XP_015641852.1;Salvia_milt…
cluster13251	11	Q9LS72	GO:0009451; P:RNA modification; IBA:GO_Central	Arabidopsis_thaliana|NP_189568.1;Coffea_canephora|CDP02272.1;Leonurus_japonicus|GWHPBQCV023928_mRNA=GWHTBQCV023928_Gene=GWHGBQCV023928_Position=GWHBQCV00000007:;Theobroma_cacao|XP_007032637.2;Tectona_grandis|Tg09g16120.t1;Solanum_lycopersicum|XP_004232191.1;Clinopodium_gracile|Clgra_035323-T1;Vitis_vinifera|XP_002278886.1;Oryza_sativa|XP_015618463.1;Salvia_miltiorrhiza|XP_057769632.1;Amborella_tr…
cluster13252	11	N/A	N/A	Arabidopsis_thaliana|NP_001030679.1;Coffea_canephora|CDP00013.1;Leonurus_japonicus|GWHPBQCV028069_mRNA=GWHTBQCV028069_Gene=GWHGBQCV028069_Position=GWHBQCV00000009:;Theobroma_cacao|XP_007009606.2;Tectona_grandis|Tg15g08980.t1;Amborella_trichopoda|XP_006843659.1;Solanum_lycopersicum|XP_004236772.1;Clinopodium_gracile|Clgra_031644-T1;Vitis_vinifera|XP_002281930.1;Oryza_sativa|XP_015641970.1;Salvia_m…
cluster13254	11	N/A	N/A	Arabidopsis_thaliana|NP_850380.1;Coffea_canephora|CDP06154.1;Leonurus_japonicus|GWHPBQCV017348_mRNA=GWHTBQCV017348_Gene=GWHGBQCV017348_Position=GWHBQCV00000005:;Theobroma_cacao|XP_017970425.1;Tectona_grandis|Tg17g11230.t1;Amborella_trichopoda|XP_020524741.1;Solanum_lycopersicum|XP_004243212.1;Clinopodium_gracile|Clgra_032788-T1;Vitis_vinifera|XP_002283386.1;Oryza_sativa|XP_015620106.1;Salvia_milt…
cluster13255	11	A0MFS5	GO:0015979; P:photosynthesis; IMP:TAIR	Arabidopsis_thaliana|NP_001118908.1;Coffea_canephora|CDP08697.1;Leonurus_japonicus|GWHPBQCV003547_mRNA=GWHTBQCV003547_Gene=GWHGBQCV003547_Position=GWHBQCV00000010:;Theobroma_cacao|XP_017979173.1;Tectona_grandis|Tg06g00820.t1;Amborella_trichopoda|XP_006852647.1;Solanum_lycopersicum|XP_004231208.1;Clinopodium_gracile|Clgra_024999-T1;Vitis_vinifera|XP_002281157.1;Oryza_sativa|XP_015637556.1;Salvia_m…
cluster13256	11	Q43062	GO:0045490; P:pectin catabolic process; IEA:UniProtKB-UniPathway	Arabidopsis_thaliana|NP_187213.1;Coffea_canephora|CDP17209.1;Leonurus_japonicus|GWHPBQCV020917_mRNA=GWHTBQCV020917_Gene=GWHGBQCV020917_Position=GWHBQCV00000007:;Theobroma_cacao|XP_007031047.2;Tectona_grandis|Tg08g11680.t1;Solanum_lycopersicum|XP_004230262.1;Clinopodium_gracile|Clgra_011157-T1;Vitis_vinifera|XP_010659655.2;Oryza_sativa|XP_015640626.1;Salvia_miltiorrhiza|XP_057778766.1;Amborella_tr…
cluster13257	11	O23344	GO:0009644; P:response to high light intensity; IEP:UniProtKB	Arabidopsis_thaliana|NP_193225.1;Coffea_canephora|CDO99062.1;Leonurus_japonicus|GWHPBQCV014568_mRNA=GWHTBQCV014568_Gene=GWHGBQCV014568_Position=GWHBQCV00000004:;Theobroma_cacao|XP_007034763.2;Tectona_grandis|Tg08g02640.t1;Amborella_trichopoda|XP_006826274.1;Solanum_lycopersicum|XP_004234013.1;Clinopodium_gracile|Clgra_028769-T1;Vitis_vinifera|XP_002282517.1;Oryza_sativa|XP_015627997.1;Salvia_milt…
cluster13259	11	Q9SXC8	GO:1990592; P:protein K69-linked ufmylation; IBA:GO_Central	Arabidopsis_thaliana|NP_564289.1;Coffea_canephora|CDP00961.1;Leonurus_japonicus|GWHPBQCV019491_mRNA=GWHTBQCV019491_Gene=GWHGBQCV019491_Position=GWHBQCV00000006:;Theobroma_cacao|XP_007018345.1;Tectona_grandis|Tg03g00610.t1;Amborella_trichopoda|XP_006852706.1;Solanum_lycopersicum|XP_004238037.1;Clinopodium_gracile|Clgra_040125-T1;Vitis_vinifera|XP_002285581.1;Oryza_sativa|XP_015614638.1;Salvia_milt…
cluster13269	11	Q58FZ0	GO:0030001; P:metal ion transport; IEA:InterPro	Amborella_trichopoda|XP_006850635.2;Arabidopsis_thaliana|NP_180434.2;Theobroma_cacao|XP_007016544.1;Tectona_grandis|Tg14g04760.t1;Solanum_lycopersicum|XP_004251305.1;Clinopodium_gracile|Clgra_016798-T1;Vitis_vinifera|XP_002281496.1;Oryza_sativa|XP_015641165.1;Salvia_miltiorrhiza|XP_057782784.1;Coffea_canephora|CDP08986.1;Leonurus_japonicus|GWHPBQCV013254_mRNA=GWHTBQCV013254_Gene=GWHGBQCV013254_Po…
cluster13316	11	Q9LS48	GO:0009658; P:chloroplast organization; IMP:UniProtKB	Arabidopsis_thaliana|NP_568061.1;Coffea_canephora|CDP12879.1;Leonurus_japonicus|GWHPBQCV022975_mRNA=GWHTBQCV022975_Gene=GWHGBQCV022975_Position=GWHBQCV00000007:;Theobroma_cacao|XP_007048154.2;Tectona_grandis|Tg09g11760.t1;Amborella_trichopoda|XP_006842190.2;Solanum_lycopersicum|XP_004237470.1;Clinopodium_gracile|Clgra_035576-T1;Vitis_vinifera|XP_010652867.1;Oryza_sativa|XP_015637570.1;Salvia_milt…
cluster13318	11	O64571	GO:0008270; F:zinc ion binding; IEA:InterPro	Arabidopsis_thaliana|NP_565451.1;Coffea_canephora|CDP03123.1;Leonurus_japonicus|GWHPBQCV026882_mRNA=GWHTBQCV026882_Gene=GWHGBQCV026882_Position=GWHBQCV00000009:;Theobroma_cacao|XP_007012731.2;Tectona_grandis|Tg02g04470.t4;Amborella_trichopoda|XP_006843178.1;Solanum_lycopersicum|XP_004243733.1;Clinopodium_gracile|Clgra_019135-T1;Vitis_vinifera|XP_002280767.1;Oryza_sativa|XP_015625360.1;Salvia_milt…
cluster13321	11	N/A	N/A	Arabidopsis_thaliana|NP_683492.1;Coffea_canephora|CDO98440.1;Leonurus_japonicus|GWHPBQCV010935_mRNA=GWHTBQCV010935_Gene=GWHGBQCV010935_Position=GWHBQCV00000003:;Theobroma_cacao|XP_007036508.2;Tectona_grandis|Tg10g06790.t1;Amborella_trichopoda|XP_006838414.2;Solanum_lycopersicum|NP_001333824.1;Clinopodium_gracile|Clgra_027566-T1;Vitis_vinifera|XP_002276428.1;Oryza_sativa|XP_015628600.1;Salvia_milt…
cluster13322	11	Q9FX21	GO:0006486; P:protein glycosylation; IEA:UniProtKB-UniPathway	Arabidopsis_thaliana|NP_174675.2;Coffea_canephora|CDO98566.1;Leonurus_japonicus|GWHPBQCV018228_mRNA=GWHTBQCV018228_Gene=GWHGBQCV018228_Position=GWHBQCV00000006:;Theobroma_cacao|XP_007010857.1;Tectona_grandis|Tg16g13600.t1;Amborella_trichopoda|XP_006847859.1;Solanum_lycopersicum|XP_004235404.1;Clinopodium_gracile|Clgra_013219-T1;Vitis_vinifera|XP_002269119.2;Oryza_sativa|XP_015635991.1;Salvia_milt…
cluster13327	11	F4I8R6	GO:0045892; P:negative regulation of transcription, DNA-templated; IDA:TAIR	Arabidopsis_thaliana|NP_178114.1;Coffea_canephora|CDO98061.1;Leonurus_japonicus|GWHPBQCV010352_mRNA=GWHTBQCV010352_Gene=GWHGBQCV010352_Position=GWHBQCV00000003:;Theobroma_cacao|XP_007024118.2;Tectona_grandis|Tg10g12920.t1;Solanum_lycopersicum|XP_004236407.1;Clinopodium_gracile|Clgra_007264-T1;Vitis_vinifera|XP_002279759.2;Salvia_miltiorrhiza|XP_057773004.1;Oryza_sativa|XP_015646497.1;Amborella_tr…
cluster13329	11	Q9LZD0	GO:0043100; P:pyrimidine nucleobase salvage; IMP:TAIR	Arabidopsis_thaliana|NP_568122.2;Coffea_canephora|CDP15312.1;Leonurus_japonicus|GWHPBQCV016005_mRNA=GWHTBQCV016005_Gene=GWHGBQCV016005_Position=GWHBQCV00000005:;Theobroma_cacao|XP_007027529.2;Tectona_grandis|Tg01g16510.t1;Amborella_trichopoda|XP_006826231.2;Solanum_lycopersicum|XP_004246596.1;Clinopodium_gracile|Clgra_010811-T1;Vitis_vinifera|XP_002264940.2;Oryza_sativa|XP_015622623.1;Salvia_milt…
cluster13330	11	Q8L4D8	GO:0005886; C:plasma membrane; IDA:TAIR	Arabidopsis_thaliana|NP_194037.2;Coffea_canephora|CDP09797.1;Leonurus_japonicus|GWHPBQCV023781_mRNA=GWHTBQCV023781_Gene=GWHGBQCV023781_Position=GWHBQCV00000007:;Theobroma_cacao|XP_007040139.2;Tectona_grandis|Tg18g14760.t2;Amborella_trichopoda|XP_006857873.1;Solanum_lycopersicum|NP_001309011.1;Clinopodium_gracile|Clgra_012793-T1;Vitis_vinifera|XP_002276651.1;Oryza_sativa|XP_015633522.1;Salvia_milt…
cluster13331	11	Q9FHQ3	GO:0009651; P:response to salt stress; IBA:GO_Central	Arabidopsis_thaliana|NP_198583.1;Coffea_canephora|CDP01641.1;Leonurus_japonicus|GWHPBQCV020229_mRNA=GWHTBQCV020229_Gene=GWHGBQCV020229_Position=GWHBQCV00000006:;Theobroma_cacao|XP_007032121.2;Tectona_grandis|Tg07g13160.t1;Amborella_trichopoda|XP_006826906.2;Solanum_lycopersicum|XP_004236689.1;Clinopodium_gracile|Clgra_009768-T1;Vitis_vinifera|XP_002283860.1;Oryza_sativa|XP_015641984.1;Salvia_milt…
cluster13333	11	Q8S9J0	GO:0016567; P:protein ubiquitination; IBA:GO_Central	Arabidopsis_thaliana|NP_850267.1;Coffea_canephora|CDP15335.1;Leonurus_japonicus|GWHPBQCV016026_mRNA=GWHTBQCV016026_Gene=GWHGBQCV016026_Position=GWHBQCV00000005:;Theobroma_cacao|XP_007027567.2;Tectona_grandis|Tg01g16710.t2;Amborella_trichopoda|XP_006838739.1;Solanum_lycopersicum|XP_004246584.1;Clinopodium_gracile|Clgra_010794-T1;Vitis_vinifera|XP_002283988.1;Oryza_sativa|XP_015631821.1;Salvia_milt…
cluster13335	11	Q9M1T1	GO:0005975; P:carbohydrate metabolic process; IEA:InterPro	Arabidopsis_thaliana|NP_191029.1;Coffea_canephora|CDP20569.1;Leonurus_japonicus|GWHPBQCV010665_mRNA=GWHTBQCV010665_Gene=GWHGBQCV010665_Position=GWHBQCV00000003:;Theobroma_cacao|XP_007050273.2;Tectona_grandis|Tg10g01540.t1;Amborella_trichopoda|XP_006857298.1;Solanum_lycopersicum|XP_004235377.1;Clinopodium_gracile|Clgra_028126-T1;Vitis_vinifera|XP_002277616.2;Oryza_sativa|XP_015627385.1;Salvia_milt…
cluster13336	11	Q9FLD7	GO:0009826; P:unidimensional cell growth; IDA:TAIR	Arabidopsis_thaliana|NP_565009.1;Coffea_canephora|CDP00744.1;Leonurus_japonicus|GWHPBQCV019971_mRNA=GWHTBQCV019971_Gene=GWHGBQCV019971_Position=GWHBQCV00000006:;Theobroma_cacao|XP_017971729.1;Amborella_trichopoda|XP_006850870.2;Solanum_lycopersicum|XP_004238858.1;Clinopodium_gracile|Clgra_000475-T1;Vitis_vinifera|XP_002284096.1;Oryza_sativa|XP_015640861.1;Salvia_miltiorrhiza|XP_057786371.1;Tecton…
cluster13338	11	Q7XKC8	GO:0009220; P:pyrimidine ribonucleotide biosynthetic process; IBA:GO_Central	Arabidopsis_thaliana|NP_568428.1;Coffea_canephora|CDP18559.1;Leonurus_japonicus|GWHPBQCV014659_mRNA=GWHTBQCV014659_Gene=GWHGBQCV014659_Position=GWHBQCV00000004:;Theobroma_cacao|XP_007043241.2;Tectona_grandis|Tg08g01050.t3;Amborella_trichopoda|XP_006847807.3;Solanum_lycopersicum|XP_004228528.1;Clinopodium_gracile|Clgra_028644-T1;Vitis_vinifera|XP_002267743.1;Oryza_sativa|XP_015633939.1;Salvia_milt…
cluster13339	11	Q9SX98	GO:0003333; P:amino acid transmembrane transport; IBA:GO_Central	Arabidopsis_thaliana|NP_175198.1;Coffea_canephora|CDP07603.1;Leonurus_japonicus|GWHPBQCV018785_mRNA=GWHTBQCV018785_Gene=GWHGBQCV018785_Position=GWHBQCV00000006:;Theobroma_cacao|XP_007017386.2;Tectona_grandis|Tg03g02630.t1;Amborella_trichopoda|XP_006856239.1;Solanum_lycopersicum|XP_004238196.1;Clinopodium_gracile|Clgra_038985-T1;Vitis_vinifera|XP_002284114.1;Oryza_sativa|XP_015618882.1;Salvia_milt…
cluster13342	11	O22130	GO:0010228; P:vegetative to reproductive phase transition of meristem; IMP:TAIR	Arabidopsis_thaliana|NP_191115.1;Coffea_canephora|CDP00129.1;Theobroma_cacao|XP_017984146.1;Tectona_grandis|Tg12g04850.t1;Solanum_lycopersicum|XP_004239909.1;Clinopodium_gracile|Clgra_011466-T1;Salvia_miltiorrhiza|XP_057804054.1;Leonurus_japonicus|GWHPBQCV006509_mRNA=GWHTBQCV006509_Gene=GWHGBQCV006509_Position=GWHBQCV00000002:;Amborella_trichopoda|XP_006846339.1;Vitis_vinifera|XP_019079540.1;Oryz…
cluster13345	11	N/A	N/A	Arabidopsis_thaliana|NP_177422.1;Coffea_canephora|CDO97877.1;Leonurus_japonicus|GWHPBQCV010181_mRNA=GWHTBQCV010181_Gene=GWHGBQCV010181_Position=GWHBQCV00000003:;Theobroma_cacao|XP_007024556.2;Tectona_grandis|Tg10g15550.t2;Amborella_trichopoda|XP_020522139.1;Solanum_lycopersicum|XP_010318494.1;Vitis_vinifera|XP_010654508.1;Salvia_miltiorrhiza|XP_057793015.1;Oryza_sativa|XP_015626777.1;Clinopodium_…
cluster13346	11	Q9FL44	GO:0009735; P:response to cytokinin; IDA:TAIR	Arabidopsis_thaliana|NP_568178.1;Coffea_canephora|CDP19445.1;Leonurus_japonicus|GWHPBQCV000351_mRNA=GWHTBQCV000351_Gene=GWHGBQCV000351_Position=GWHBQCV00000001:;Theobroma_cacao|XP_007010798.1;Tectona_grandis|Tg06g08910.t1;Amborella_trichopoda|XP_006858521.1;Solanum_lycopersicum|NP_001234524.1;Clinopodium_gracile|Clgra_026520-T1;Vitis_vinifera|XP_002266585.2;Oryza_sativa|XP_015625881.1;Salvia_milt…
cluster13347	11	N/A	N/A	Arabidopsis_thaliana|NP_568234.1;Coffea_canephora|CDP07000.1;Leonurus_japonicus|GWHPBQCV009305_mRNA=GWHTBQCV009305_Gene=GWHGBQCV009305_Position=GWHBQCV00000003:;Theobroma_cacao|XP_007011606.1;Tectona_grandis|Tg05g04550.t1;Amborella_trichopoda|XP_011623886.1;Solanum_lycopersicum|XP_004232652.1;Clinopodium_gracile|Clgra_024079-T1;Vitis_vinifera|XP_002272001.1;Oryza_sativa|XP_015624072.1;Salvia_milt…
cluster13351	11	Q9LN22	GO:0005739; C:mitochondrion; IDA:TAIR	Arabidopsis_thaliana|NP_564110.1;Coffea_canephora|CDP11248.1;Leonurus_japonicus|GWHPBQCV018905_mRNA=GWHTBQCV018905_Gene=GWHGBQCV018905_Position=GWHBQCV00000006:;Theobroma_cacao|XP_007017910.2;Tectona_grandis|Tg03g04320.t1;Amborella_trichopoda|XP_006845699.1;Solanum_lycopersicum|XP_004238390.1;Clinopodium_gracile|Clgra_036827-T1;Vitis_vinifera|XP_002284756.1;Oryza_sativa|XP_015651356.1;Salvia_milt…
cluster13352	11	O22261	GO:0043132; P:NAD transport; IDA:TAIR	Arabidopsis_thaliana|NP_566102.1;Coffea_canephora|CDP17096.1;Leonurus_japonicus|GWHPBQCV008675_mRNA=GWHTBQCV008675_Gene=GWHGBQCV008675_Position=GWHBQCV00000002:;Theobroma_cacao|XP_007051022.2;Tectona_grandis|Tg14g14770.t2;Amborella_trichopoda|XP_006855345.1;Solanum_lycopersicum|XP_010326568.1;Clinopodium_gracile|Clgra_030918-T1;Vitis_vinifera|XP_002273574.1;Oryza_sativa|XP_015640768.1;Salvia_milt…
cluster13356	11	O81416	GO:0030245; P:cellulose catabolic process; IEA:UniProtKB-KW	Arabidopsis_thaliana|NP_192138.1;Coffea_canephora|CDP17109.1;Leonurus_japonicus|GWHPBQCV013508_mRNA=GWHTBQCV013508_Gene=GWHGBQCV013508_Position=GWHBQCV00000004:;Theobroma_cacao|XP_007050983.1;Tectona_grandis|Tg05g08820.t1;Amborella_trichopoda|XP_011622228.2;Solanum_lycopersicum|NP_001234882.1;Clinopodium_gracile|Clgra_018748-T1;Vitis_vinifera|XP_002271736.1;Oryza_sativa|XP_015625766.1;Salvia_milt…
cluster13357	11	Q94C25	GO:0006468; P:protein phosphorylation; IBA:GO_Central	Arabidopsis_thaliana|NP_197505.1;Coffea_canephora|CDP10366.1;Leonurus_japonicus|GWHPBQCV004964_mRNA=GWHTBQCV004964_Gene=GWHGBQCV004964_Position=GWHBQCV00000010:;Theobroma_cacao|XP_017982242.1;Tectona_grandis|Tg01g10080.t1;Amborella_trichopoda|XP_006841919.1;Solanum_lycopersicum|XP_004240528.1;Clinopodium_gracile|Clgra_022792-T1;Vitis_vinifera|XP_010656399.1;Oryza_sativa|XP_015642493.1;Salvia_milt…
cluster13358	11	Q9LZR8	GO:0048544; P:recognition of pollen; IEA:InterPro	Arabidopsis_thaliana|NP_195990.1;Coffea_canephora|CDP15368.1;Leonurus_japonicus|GWHPBQCV016050_mRNA=GWHTBQCV016050_Gene=GWHGBQCV016050_Position=GWHBQCV00000005:;Theobroma_cacao|XP_007027624.2;Tectona_grandis|Tg01g16970.t1;Amborella_trichopoda|XP_006851634.1;Solanum_lycopersicum|XP_004246898.2;Clinopodium_gracile|Clgra_010768-T1;Vitis_vinifera|XP_002283448.1;Oryza_sativa|XP_015625805.1;Salvia_milt…
cluster13362	11	A7PZL3	GO:0005975; P:carbohydrate metabolic process; IEA:InterPro	Arabidopsis_thaliana|NP_195070.2;Coffea_canephora|CDP04683.1;Leonurus_japonicus|GWHPBQCV023099_mRNA=GWHTBQCV023099_Gene=GWHGBQCV023099_Position=GWHBQCV00000007:;Theobroma_cacao|XP_007048405.2;Tectona_grandis|Tg09g02770.t1;Amborella_trichopoda|XP_006842393.1;Solanum_lycopersicum|XP_004242037.1;Clinopodium_gracile|Clgra_034536-T1;Vitis_vinifera|XP_002274138.2;Oryza_sativa|XP_015650647.1;Salvia_milt…
cluster13365	11	Q9FLY0	GO:0009627; P:systemic acquired resistance; IDA:TAIR	Arabidopsis_thaliana|NP_200093.1;Coffea_canephora|CDP05134.1;Leonurus_japonicus|GWHPBQCV027928_mRNA=GWHTBQCV027928_Gene=GWHGBQCV027928_Position=GWHBQCV00000009:;Theobroma_cacao|XP_007038837.2;Tectona_grandis|Tg15g07290.t1;Amborella_trichopoda|XP_006829090.1;Solanum_lycopersicum|XP_004240714.1;Clinopodium_gracile|Clgra_031428-T1;Vitis_vinifera|XP_002275817.1;Oryza_sativa|XP_015612994.1;Salvia_milt…
cluster13367	11	O54873	GO:0006412; P:translation; IEA:UniProtKB-KW	Arabidopsis_thaliana|NP_191557.1;Coffea_canephora|CDP19081.1;Leonurus_japonicus|GWHPBQCV025226_mRNA=GWHTBQCV025226_Gene=GWHGBQCV025226_Position=GWHBQCV00000008:;Theobroma_cacao|XP_007011444.1;Tectona_grandis|Tg04g15560.t1;Amborella_trichopoda|XP_006844787.3;Solanum_lycopersicum|XP_004244789.1;Clinopodium_gracile|Clgra_038954-T1;Vitis_vinifera|XP_002280840.1;Oryza_sativa|XP_015636579.1;Salvia_milt…
cluster13369	11	O49279	GO:0016567; P:protein ubiquitination; IEA:UniProtKB-UniPathway	Arabidopsis_thaliana|NP_565142.1;Coffea_canephora|CDP11371.1;Leonurus_japonicus|GWHPBQCV019064_mRNA=GWHTBQCV019064_Gene=GWHGBQCV019064_Position=GWHBQCV00000006:;Theobroma_cacao|XP_007019461.1;Tectona_grandis|Tg03g05580.t1;Amborella_trichopoda|XP_020529426.1;Solanum_lycopersicum|XP_004237773.1;Clinopodium_gracile|Clgra_036972-T1;Vitis_vinifera|XP_002266510.1;Oryza_sativa|XP_015634940.1;Salvia_milt…
cluster13370	11	Q9LSF5	GO:0005739; C:mitochondrion; IBA:GO_Central	Arabidopsis_thaliana|NP_189158.3;Coffea_canephora|CDP03932.1;Leonurus_japonicus|GWHPBQCV015927_mRNA=GWHTBQCV015927_Gene=GWHGBQCV015927_Position=GWHBQCV00000005:;Theobroma_cacao|XP_007049649.2;Tectona_grandis|Tg18g08340.t1;Amborella_trichopoda|XP_006838556.1;Solanum_lycopersicum|XP_004242426.3;Clinopodium_gracile|Clgra_030608-T1;Vitis_vinifera|XP_002283378.1;Oryza_sativa|XP_015643301.2;Salvia_milt…
cluster13373	11	P97852	GO:0048545; P:response to steroid hormone; IEP:RGD	Arabidopsis_thaliana|NP_199103.1;Coffea_canephora|CDP01360.1;Leonurus_japonicus|GWHPBQCV019645_mRNA=GWHTBQCV019645_Gene=GWHGBQCV019645_Position=GWHBQCV00000006:;Theobroma_cacao|XP_017980816.1;Tectona_grandis|Tg03g17460.t1;Amborella_trichopoda|XP_006838051.1;Solanum_lycopersicum|XP_004238156.1;Clinopodium_gracile|Clgra_039790-T1;Vitis_vinifera|XP_002284735.1;Oryza_sativa|XP_015644522.1;Salvia_milt…
cluster13375	11	Q0WNN7	GO:0009507; C:chloroplast; IEA:UniProtKB-SubCell	Arabidopsis_thaliana|NP_180571.3;Coffea_canephora|CDP09228.1;Leonurus_japonicus|GWHPBQCV015809_mRNA=GWHTBQCV015809_Gene=GWHGBQCV015809_Position=GWHBQCV00000005:;Theobroma_cacao|XP_017982611.1;Tectona_grandis|Tg18g06880.t1;Amborella_trichopoda|XP_006847406.2;Solanum_lycopersicum|XP_004239038.1;Clinopodium_gracile|Clgra_029972-T1;Vitis_vinifera|XP_002278434.1;Oryza_sativa|XP_015639276.1;Salvia_milt…
cluster13379	11	Q08891	GO:0010345; P:suberin biosynthetic process; IBA:GO_Central	Arabidopsis_thaliana|NP_187805.1;Coffea_canephora|CDP14283.1;Leonurus_japonicus|GWHPBQCV003465_mRNA=GWHTBQCV003465_Gene=GWHGBQCV003465_Position=GWHBQCV00000001:;Theobroma_cacao|XP_007029101.2;Tectona_grandis|Tg13g15830.t1;Amborella_trichopoda|XP_020521944.1;Solanum_lycopersicum|XP_004234754.1;Clinopodium_gracile|Clgra_001072-T1;Vitis_vinifera|NP_001304060.1;Oryza_sativa|XP_015632305.1;Salvia_milt…
cluster13381	11	Q9ZU91	GO:0006952; P:defense response; IEA:UniProtKB-KW	Arabidopsis_thaliana|NP_178637.2;Coffea_canephora|CDP05678.1;Leonurus_japonicus|GWHPBQCV017583_mRNA=GWHTBQCV017583_Gene=GWHGBQCV017583_Position=GWHBQCV00000005:;Theobroma_cacao|XP_017979250.1;Tectona_grandis|Tg17g14740.t1;Amborella_trichopoda|XP_006837267.2;Solanum_lycopersicum|XP_004243515.1;Clinopodium_gracile|Clgra_032473-T1;Vitis_vinifera|XP_002274828.1;Oryza_sativa|XP_015625926.1;Salvia_milt…
cluster13382	11	Q55480	GO:0016773; F:phosphotransferase activity, alcohol group as acceptor; IEA:InterPro	Arabidopsis_thaliana|NP_567780.1;Coffea_canephora|CDP04921.1;Leonurus_japonicus|GWHPBQCV024189_mRNA=GWHTBQCV024189_Gene=GWHGBQCV024189_Position=GWHBQCV00000007:;Theobroma_cacao|XP_017977760.1;Tectona_grandis|Tg09g12960.t4;Amborella_trichopoda|XP_006837407.2;Solanum_lycopersicum|XP_010318288.1;Clinopodium_gracile|Clgra_034855-T1;Vitis_vinifera|XP_002271653.1;Oryza_sativa|XP_015614612.1;Salvia_milt…
cluster13388	11	P82658	GO:0015979; P:photosynthesis; IEA:InterPro	Arabidopsis_thaliana|NP_001190172.1;Coffea_canephora|CDP07760.1;Leonurus_japonicus|GWHPBQCV004029_mRNA=GWHTBQCV004029_Gene=GWHGBQCV004029_Position=GWHBQCV00000010:;Theobroma_cacao|XP_007052545.2;Tectona_grandis|Tg06g07150.t1;Amborella_trichopoda|XP_006850172.1;Solanum_lycopersicum|XP_004229619.1;Clinopodium_gracile|Clgra_026034-T1;Vitis_vinifera|XP_002275752.1;Oryza_sativa|XP_015650932.1;Salvia_m…
cluster13389	11	N/A	N/A	Arabidopsis_thaliana|NP_565655.1;Coffea_canephora|CDP06938.1;Leonurus_japonicus|GWHPBQCV004226_mRNA=GWHTBQCV004226_Gene=GWHGBQCV004226_Position=GWHBQCV00000010:;Theobroma_cacao|XP_007015855.2;Tectona_grandis|Tg14g02440.t1;Amborella_trichopoda|XP_011625961.1;Solanum_lycopersicum|XP_004241315.1;Clinopodium_gracile|Clgra_014716-T1;Vitis_vinifera|XP_002274661.1;Oryza_sativa|XP_015621480.1;Salvia_milt…
cluster13390	11	Q7XUA8	GO:0016787; F:hydrolase activity; IEA:UniProtKB-KW	Arabidopsis_thaliana|NP_200225.1;Leonurus_japonicus|GWHPBQCV005916_mRNA=GWHTBQCV005916_Gene=GWHGBQCV005916_Position=GWHBQCV00000002:;Theobroma_cacao|XP_007039231.1;Tectona_grandis|Tg06g17640.t1;Amborella_trichopoda|XP_006846441.1;Solanum_lycopersicum|NP_001334623.1;Vitis_vinifera|XP_002269226.1;Oryza_sativa|XP_015636371.1;Salvia_miltiorrhiza|XP_057800754.1;Clinopodium_gracile|Clgra_033080-T1;Coff…
cluster13392	11	Q9LVQ0	GO:0045488; P:pectin metabolic process; IDA:TAIR	Arabidopsis_thaliana|NP_566842.1;Coffea_canephora|CDP05714.1;Leonurus_japonicus|GWHPBQCV023941_mRNA=GWHTBQCV023941_Gene=GWHGBQCV023941_Position=GWHBQCV00000007:;Theobroma_cacao|XP_007032611.1;Tectona_grandis|Tg09g15980.t4;Amborella_trichopoda|XP_011622561.1;Solanum_lycopersicum|XP_004253337.1;Clinopodium_gracile|Clgra_035307-T1;Vitis_vinifera|XP_002283941.1;Oryza_sativa|XP_015614296.1;Salvia_milt…
cluster13394	11	N/A	N/A	Arabidopsis_thaliana|NP_176680.2;Coffea_canephora|CDP04922.1;Leonurus_japonicus|GWHPBQCV006994_mRNA=GWHTBQCV006994_Gene=GWHGBQCV006994_Position=GWHBQCV00000002:;Theobroma_cacao|XP_007029646.2;Tectona_grandis|Tg15g05730.t1;Amborella_trichopoda|XP_006837410.1;Solanum_lycopersicum|XP_004235362.1;Clinopodium_gracile|Clgra_017066-T1;Vitis_vinifera|XP_002272028.2;Oryza_sativa|XP_015629218.1;Salvia_milt…
cluster13395	11	N/A	N/A	Arabidopsis_thaliana|NP_566028.1;Coffea_canephora|CDP04958.1;Leonurus_japonicus|GWHPBQCV027814_mRNA=GWHTBQCV027814_Gene=GWHGBQCV027814_Position=GWHBQCV00000009:;Theobroma_cacao|XP_007029500.1;Tectona_grandis|Tg15g06000.t1;Amborella_trichopoda|XP_006854025.2;Solanum_lycopersicum|XP_004242589.1;Clinopodium_gracile|Clgra_016995-T1;Vitis_vinifera|XP_002278704.1;Oryza_sativa|XP_015614133.1;Salvia_milt…
cluster13399	11	Q75AB6	GO:0006364; P:rRNA processing; IEA:UniProtKB-KW	Arabidopsis_thaliana|NP_563668.1;Coffea_canephora|CDP20844.1;Leonurus_japonicus|GWHPBQCV008622_mRNA=GWHTBQCV008622_Gene=GWHGBQCV008622_Position=GWHBQCV00000002:;Theobroma_cacao|XP_007050901.1;Tectona_grandis|Tg14g14230.t1;Amborella_trichopoda|XP_006840560.1;Solanum_lycopersicum|XP_004247426.1;Clinopodium_gracile|Clgra_031125-T1;Vitis_vinifera|XP_002265366.1;Oryza_sativa|XP_015637960.1;Salvia_milt…
cluster13400	11	Q9ZQA8	GO:0006417; P:regulation of translation; IEA:UniProtKB-KW	Arabidopsis_thaliana|NP_181204.1;Coffea_canephora|CDP15322.1;Leonurus_japonicus|GWHPBQCV027571_mRNA=GWHTBQCV027571_Gene=GWHGBQCV027571_Position=GWHBQCV00000009:;Theobroma_cacao|XP_007027540.2;Tectona_grandis|Tg13g10510.t1;Amborella_trichopoda|XP_006838775.1;Solanum_lycopersicum|XP_004249577.1;Clinopodium_gracile|Clgra_008313-T1;Vitis_vinifera|XP_002264613.1;Oryza_sativa|XP_015630119.1;Salvia_milt…
cluster13401	11	N/A	N/A	Arabidopsis_thaliana|NP_177700.1;Coffea_canephora|CDP07405.1;Leonurus_japonicus|GWHPBQCV018830_mRNA=GWHTBQCV018830_Gene=GWHGBQCV018830_Position=GWHBQCV00000006:;Theobroma_cacao|XP_007017790.2;Tectona_grandis|Tg03g03470.t1;Amborella_trichopoda|XP_006857263.1;Solanum_lycopersicum|XP_004238353.1;Clinopodium_gracile|Clgra_036749-T1;Vitis_vinifera|XP_002276294.1;Oryza_sativa|XP_015634299.1;Salvia_milt…
cluster13402	11	N/A	N/A	Arabidopsis_thaliana|NP_568790.1;Coffea_canephora|CDP05107.1;Leonurus_japonicus|GWHPBQCV006092_mRNA=GWHTBQCV006092_Gene=GWHGBQCV006092_Position=GWHBQCV00000002:;Theobroma_cacao|XP_007038929.1;Tectona_grandis|TgUn339g00010.t1;Amborella_trichopoda|XP_006829175.1;Solanum_lycopersicum|XP_004234190.1;Clinopodium_gracile|Clgra_021258-T1;Vitis_vinifera|XP_002267522.1;Oryza_sativa|XP_015642924.1;Salvia_m…
cluster13404	11	Q6DRD9	GO:0016787; F:hydrolase activity; IEA:UniProtKB-KW	Arabidopsis_thaliana|NP_190825.2;Coffea_canephora|CDP20112.1;Leonurus_japonicus|GWHPBQCV021168_mRNA=GWHTBQCV021168_Gene=GWHGBQCV021168_Position=GWHBQCV00000007:;Theobroma_cacao|XP_007027816.2;Tectona_grandis|Tg01g17700.t1;Amborella_trichopoda|XP_006826200.3;Solanum_lycopersicum|XP_004249433.1;Clinopodium_gracile|Clgra_010694-T1;Vitis_vinifera|XP_002282116.1;Oryza_sativa|XP_015620887.1;Salvia_milt…
cluster13405	11	Q9S586	GO:0046295; P:glycolate biosynthetic process; IEA:UniProtKB-UniPathway	Arabidopsis_thaliana|NP_181658.1;Coffea_canephora|CDP09530.1;Leonurus_japonicus|GWHPBQCV004509_mRNA=GWHTBQCV004509_Gene=GWHGBQCV004509_Position=GWHBQCV00000010:;Theobroma_cacao|XP_007028494.1;Tectona_grandis|Tg01g03150.t1;Amborella_trichopoda|XP_006854788.1;Solanum_lycopersicum|NP_001334518.1;Clinopodium_gracile|Clgra_023308-T1;Vitis_vinifera|XP_002273524.1;Oryza_sativa|XP_015645010.1;Salvia_milt…
cluster13408	11	Q9SGN6	GO:0009651; P:response to salt stress; TAS:TAIR	Arabidopsis_thaliana|NP_564307.1;Coffea_canephora|CDO99506.1;Leonurus_japonicus|GWHPBQCV003106_mRNA=GWHTBQCV003106_Gene=GWHGBQCV003106_Position=GWHBQCV00000001:;Theobroma_cacao|XP_007025556.2;Tectona_grandis|Tg02g15400.t1;Solanum_lycopersicum|XP_004232912.1;Clinopodium_gracile|Clgra_020830-T1;Vitis_vinifera|XP_002273740.2;Oryza_sativa|XP_015637473.1;Salvia_miltiorrhiza|XP_057764451.1;Amborella_tr…
cluster13409	11	Q9LLE8	GO:0009416; P:response to light stimulus; IEP:TAIR	Arabidopsis_thaliana|NP_180193.1;Coffea_canephora|CDP17887.1;Leonurus_japonicus|GWHPBQCV009213_mRNA=GWHTBQCV009213_Gene=GWHGBQCV009213_Position=GWHBQCV00000003:;Theobroma_cacao|XP_017983496.1;Tectona_grandis|Tg05g03670.t1;Amborella_trichopoda|XP_006843898.1;Solanum_lycopersicum|XP_004245205.1;Clinopodium_gracile|Clgra_023936-T1;Vitis_vinifera|XP_002282234.1;Oryza_sativa|XP_015632380.1;Salvia_milt…
cluster13411	11	Q9SII5	GO:0005615; C:extracellular space; IEA:UniProtKB-SubCell	Arabidopsis_thaliana|NP_565797.1;Coffea_canephora|CDP11243.1;Leonurus_japonicus|GWHPBQCV002296_mRNA=GWHTBQCV002296_Gene=GWHGBQCV002296_Position=GWHBQCV00000001:;Theobroma_cacao|XP_007024942.2;Tectona_grandis|Tg02g20040.t1;Solanum_lycopersicum|XP_004233236.1;Vitis_vinifera|XP_003631238.1;Salvia_miltiorrhiza|XP_057812130.1;Clinopodium_gracile|Clgra_004134-T1;Amborella_trichopoda|XP_006853428.1;Oryz…
cluster13413	11	O80360	GO:0006412; P:translation; IEA:InterPro	Arabidopsis_thaliana|NP_181831.1;Coffea_canephora|CDP07633.1;Leonurus_japonicus|GWHPBQCV003970_mRNA=GWHTBQCV003970_Gene=GWHGBQCV003970_Position=GWHBQCV00000010:;Theobroma_cacao|XP_017977213.1;Tectona_grandis|Tg06g06270.t1;Amborella_trichopoda|XP_006841543.2;Solanum_lycopersicum|XP_004240919.1;Clinopodium_gracile|Clgra_025794-T1;Vitis_vinifera|XP_002271466.1;Oryza_sativa|XP_015625363.1;Salvia_milt…
cluster13415	11	P81748	GO:0050178; F:phenylpyruvate tautomerase activity; IEA:UniProtKB-EC	Arabidopsis_thaliana|NP_200527.1;Coffea_canephora|CDP15783.1;Leonurus_japonicus|GWHPBQCV014928_mRNA=GWHTBQCV014928_Gene=GWHGBQCV014928_Position=GWHBQCV00000005:;Theobroma_cacao|XP_007014427.1;Tectona_grandis|Tg01g13710.t1;Amborella_trichopoda|XP_006850878.1;Solanum_lycopersicum|XP_004242799.1;Clinopodium_gracile|Clgra_019485-T1;Vitis_vinifera|XP_002264373.1;Oryza_sativa|XP_015643567.1;Salvia_milt…
cluster13416	11	Q67XG0	GO:0001666; P:response to hypoxia; IEP:TAIR	Arabidopsis_thaliana|NP_567901.1;Coffea_canephora|CDP18482.1;Leonurus_japonicus|GWHPBQCV009132_mRNA=GWHTBQCV009132_Gene=GWHGBQCV009132_Position=GWHBQCV00000003:;Theobroma_cacao|XP_017983796.1;Tectona_grandis|Tg05g02890.t1;Amborella_trichopoda|XP_006842233.1;Solanum_lycopersicum|XP_004245251.1;Clinopodium_gracile|Clgra_023847-T1;Vitis_vinifera|XP_002284484.1;Oryza_sativa|XP_015640966.1;Salvia_milt…
cluster13419	11	N/A	N/A	Arabidopsis_thaliana|NP_565087.1;Coffea_canephora|CDP12309.1;Leonurus_japonicus|GWHPBQCV016655_mRNA=GWHTBQCV016655_Gene=GWHGBQCV016655_Position=GWHBQCV00000005:;Theobroma_cacao|XP_007037336.2;Tectona_grandis|Tg11g03450.t1;Amborella_trichopoda|XP_006827234.1;Solanum_lycopersicum|XP_004236001.1;Clinopodium_gracile|Clgra_006095-T1;Vitis_vinifera|XP_002284929.1;Oryza_sativa|XP_015612668.1;Salvia_milt…
cluster13421	11	Q6K687	GO:0046872; F:metal ion binding; IEA:UniProtKB-KW	Arabidopsis_thaliana|NP_180056.1;Coffea_canephora|CDP18610.1;Leonurus_japonicus|GWHPBQCV011641_mRNA=GWHTBQCV011641_Gene=GWHGBQCV011641_Position=GWHBQCV00000003:;Theobroma_cacao|XP_007011676.2;Tectona_grandis|Tg16g02240.t1;Amborella_trichopoda|XP_006845412.1;Solanum_lycopersicum|XP_004245289.1;Clinopodium_gracile|Clgra_001411-T1;Vitis_vinifera|XP_002285580.1;Oryza_sativa|XP_015622844.1;Salvia_milt…
cluster13423	11	O82245	GO:0009651; P:response to salt stress; IEP:TAIR	Arabidopsis_thaliana|NP_566110.1;Coffea_canephora|CDP03510.1;Leonurus_japonicus|GWHPBQCV008611_mRNA=GWHTBQCV008611_Gene=GWHGBQCV008611_Position=GWHBQCV00000002:;Theobroma_cacao|XP_007050872.1;Tectona_grandis|Tg14g14140.t1;Amborella_trichopoda|XP_006840512.1;Solanum_lycopersicum|XP_004247434.1;Clinopodium_gracile|Clgra_031140-T1;Vitis_vinifera|XP_002263702.1;Oryza_sativa|XP_015639220.1;Salvia_milt…
cluster13431	11	N/A	N/A	Clinopodium_gracile|Clgra_000735-T1;Coffea_canephora|CDP12232.1;Leonurus_japonicus|GWHPBQCV022933_mRNA=GWHTBQCV022933_Gene=GWHGBQCV022933_Position=GWHBQCV00000007:;Theobroma_cacao|XP_007039180.1;Tectona_grandis|Tg11g07330.t1;Amborella_trichopoda|XP_011624218.1;Solanum_lycopersicum|XP_004245453.1;Vitis_vinifera|XP_002272716.1;Oryza_sativa|XP_015637970.1;Arabidopsis_thaliana|NP_568796.1;Salvia_milt…
cluster13434	11	O65499	GO:0006355; P:regulation of transcription, DNA-templated; TAS:TAIR	Clinopodium_gracile|Clgra_015307-T1;Coffea_canephora|CDP01373.1;Leonurus_japonicus|GWHPBQCV009512_mRNA=GWHTBQCV009512_Gene=GWHGBQCV009512_Position=GWHBQCV00000003:;Theobroma_cacao|XP_017970611.1;Tectona_grandis|Tg08g17810.t1;Amborella_trichopoda|XP_020532243.1;Solanum_lycopersicum|XP_010322908.1;Vitis_vinifera|XP_010645909.1;Oryza_sativa|XP_025878826.1;Arabidopsis_thaliana|NP_195254.1;Salvia_milt…
cluster13436	11	Q8H7F6	GO:0045454; P:cell redox homeostasis; IEA:InterPro	Clinopodium_gracile|Clgra_010385-T1;Coffea_canephora|CDP06465.1;Leonurus_japonicus|GWHPBQCV027646_mRNA=GWHTBQCV027646_Gene=GWHGBQCV027646_Position=GWHBQCV00000009:;Theobroma_cacao|XP_017976105.1;Tectona_grandis|Tg13g11480.t1;Amborella_trichopoda|XP_006843607.3;Solanum_lycopersicum|NP_001234270.2;Vitis_vinifera|XP_002263823.1;Oryza_sativa|XP_015618330.1;Arabidopsis_thaliana|NP_565885.1;Salvia_milt…
cluster13437	11	Q9LXX5	GO:0015979; P:photosynthesis; IEA:InterPro	Clinopodium_gracile|Clgra_019579-T1;Coffea_canephora|CDP06228.1;Leonurus_japonicus|GWHPBQCV003339_mRNA=GWHTBQCV003339_Gene=GWHGBQCV003339_Position=GWHBQCV00000001:;Theobroma_cacao|XP_007028260.2;Tectona_grandis|Tg13g13990.t1;Amborella_trichopoda|XP_006836240.2;Solanum_lycopersicum|XP_004241815.1;Vitis_vinifera|XP_019076972.1;Oryza_sativa|XP_015614862.1;Arabidopsis_thaliana|NP_191224.1;Salvia_milt…
cluster13439	11	Q9M117	GO:0010090; P:trichome morphogenesis; IMP:TAIR	Clinopodium_gracile|Clgra_016150-T1;Coffea_canephora|CDP09452.1;Leonurus_japonicus|GWHPBQCV003785_mRNA=GWHTBQCV003785_Gene=GWHGBQCV003785_Position=GWHBQCV00000010:;Theobroma_cacao|XP_007052282.1;Tectona_grandis|Tg06g04770.t1;Amborella_trichopoda|XP_006837331.1;Solanum_lycopersicum|XP_004229758.1;Vitis_vinifera|XP_003633894.1;Oryza_sativa|XP_015618032.1;Arabidopsis_thaliana|NP_567216.1;Salvia_milt…
cluster13442	11	N/A	N/A	Clinopodium_gracile|Clgra_017019-T1;Coffea_canephora|CDP21494.1;Leonurus_japonicus|GWHPBQCV006984_mRNA=GWHTBQCV006984_Gene=GWHGBQCV006984_Position=GWHBQCV00000002:;Theobroma_cacao|XP_007029577.2;Tectona_grandis|Tg15g05860.t1;Amborella_trichopoda|XP_006854068.1;Solanum_lycopersicum|XP_004242133.1;Vitis_vinifera|XP_002273912.1;Oryza_sativa|XP_025877807.1;Arabidopsis_thaliana|NP_568341.1;Salvia_milt…
cluster13443	11	O80505	GO:0006487; P:protein N-linked glycosylation; IBA:GO_Central	Clinopodium_gracile|Clgra_015601-T1;Coffea_canephora|CDP09387.1;Leonurus_japonicus|GWHPBQCV021729_mRNA=GWHTBQCV021729_Gene=GWHGBQCV021729_Position=GWHBQCV00000007:;Theobroma_cacao|XP_017985235.1;Tectona_grandis|Tg05g15730.t1;Amborella_trichopoda|XP_006836310.1;Solanum_lycopersicum|XP_004229713.1;Vitis_vinifera|XP_002269114.1;Oryza_sativa|XP_015622955.1;Arabidopsis_thaliana|NP_181994.5;Salvia_milt…
cluster13444	11	N/A	N/A	Clinopodium_gracile|Clgra_010566-T1;Coffea_canephora|CDP06588.1;Leonurus_japonicus|GWHPBQCV017746_mRNA=GWHTBQCV017746_Gene=GWHGBQCV017746_Position=GWHBQCV00000006:;Theobroma_cacao|XP_007026970.1;Tectona_grandis|Tg01g18830.t1;Amborella_trichopoda|XP_006846283.1;Solanum_lycopersicum|NP_001234311.1;Vitis_vinifera|XP_002269159.1;Oryza_sativa|XP_015637743.1;Arabidopsis_thaliana|NP_195836.5;Salvia_milt…
cluster13445	11	Q93ZR1	GO:0002098; P:tRNA wobble uridine modification; IMP:UniProtKB	Clinopodium_gracile|Clgra_009354-T1;Coffea_canephora|CDP15042.1;Leonurus_japonicus|GWHPBQCV010896_mRNA=GWHTBQCV010896_Gene=GWHGBQCV010896_Position=GWHBQCV00000003:;Theobroma_cacao|XP_007037876.2;Tectona_grandis|Tg10g09050.t1;Amborella_trichopoda|XP_006852168.1;Solanum_lycopersicum|XP_004236359.1;Vitis_vinifera|XP_002262701.1;Oryza_sativa|XP_015635801.1;Arabidopsis_thaliana|NP_568725.1;Salvia_milt…
cluster13448	11	Q9FIK0	GO:0006096; P:glycolytic process; ISS:TAIR	Clinopodium_gracile|Clgra_004669-T1;Coffea_canephora|CDP04555.1;Leonurus_japonicus|GWHPBQCV002537_mRNA=GWHTBQCV002537_Gene=GWHGBQCV002537_Position=GWHBQCV00000001:;Theobroma_cacao|XP_017978943.1;Tectona_grandis|Tg02g10730.t1;Amborella_trichopoda|XP_006857658.1;Solanum_lycopersicum|XP_004236642.1;Vitis_vinifera|XP_003635479.1;Oryza_sativa|XP_015635419.1;Arabidopsis_thaliana|NP_199592.1;Salvia_milt…
cluster13450	11	O86013	GO:0019439; P:aromatic compound catabolic process; IEA:UniProtKB-KW	Clinopodium_gracile|Clgra_000756-T1;Coffea_canephora|CDP12216.1;Leonurus_japonicus|GWHPBQCV011995_mRNA=GWHTBQCV011995_Gene=GWHGBQCV011995_Position=GWHBQCV00000003:;Theobroma_cacao|XP_007039418.2;Tectona_grandis|Tg11g07200.t1;Amborella_trichopoda|XP_006849197.1;Solanum_lycopersicum|XP_004244652.1;Vitis_vinifera|XP_002280836.1;Oryza_sativa|XP_015612042.1;Arabidopsis_thaliana|NP_192813.1;Salvia_milt…
cluster13451	11	Q9S7G6	GO:0008033; P:tRNA processing; IEA:UniProtKB-KW	Clinopodium_gracile|Clgra_034984-T1;Coffea_canephora|CDP02087.1;Leonurus_japonicus|GWHPBQCV024106_mRNA=GWHTBQCV024106_Gene=GWHGBQCV024106_Position=GWHBQCV00000007:;Theobroma_cacao|XP_017975839.1;Tectona_grandis|Tg09g14070.t1;Amborella_trichopoda|XP_006833262.2;Solanum_lycopersicum|XP_010316293.1;Vitis_vinifera|XP_010660886.1;Oryza_sativa|XP_015625599.1;Arabidopsis_thaliana|NP_196962.1;Salvia_milt…
cluster13454	11	N/A	N/A	Clinopodium_gracile|Clgra_037667-T1;Coffea_canephora|CDO98867.1;Leonurus_japonicus|GWHPBQCV024334_mRNA=GWHTBQCV024334_Gene=GWHGBQCV024334_Position=GWHBQCV00000008:;Theobroma_cacao|XP_007035594.1;Tectona_grandis|Tg04g02570.t1;Amborella_trichopoda|XP_006840541.1;Solanum_lycopersicum|XP_004229496.1;Vitis_vinifera|XP_003631973.1;Oryza_sativa|XP_015621260.1;Arabidopsis_thaliana|NP_567477.1;Salvia_milt…
cluster13456	11	O81208	GO:0009644; P:response to high light intensity; IEP:TAIR	Clinopodium_gracile|Clgra_008813-T1;Coffea_canephora|CDP06583.1;Leonurus_japonicus|GWHPBQCV027714_mRNA=GWHTBQCV027714_Gene=GWHGBQCV027714_Position=GWHBQCV00000009:;Theobroma_cacao|XP_017977725.1;Tectona_grandis|Tg13g12250.t2;Amborella_trichopoda|XP_006846300.2;Solanum_lycopersicum|XP_004246456.1;Vitis_vinifera|XP_002270357.1;Oryza_sativa|XP_015638262.1;Arabidopsis_thaliana|NP_195832.1;Salvia_milt…
cluster13464	11	Q9FK51	GO:0080040; P:positive regulation of cellular response to phosphate starvation; IDA:TAIR	Clinopodium_gracile|Clgra_025704-T1;Coffea_canephora|CDP14326.1;Leonurus_japonicus|GWHPBQCV003934_mRNA=GWHTBQCV003934_Gene=GWHGBQCV003934_Position=GWHBQCV00000010:;Theobroma_cacao|XP_007030717.1;Tectona_grandis|Tg06g05800.t1;Amborella_trichopoda|XP_006826294.1;Solanum_lycopersicum|XP_004248739.1;Vitis_vinifera|XP_002281972.2;Oryza_sativa|XP_015647473.1;Arabidopsis_thaliana|NP_197321.1;Salvia_milt…
cluster13466	11	N/A	N/A	Clinopodium_gracile|Clgra_019368-T1;Coffea_canephora|CDO98033.1;Leonurus_japonicus|GWHPBQCV008933_mRNA=GWHTBQCV008933_Gene=GWHGBQCV008933_Position=GWHBQCV00000003:;Theobroma_cacao|XP_007024173.2;Tectona_grandis|Tg16g11470.t1;Amborella_trichopoda|XP_006854146.2;Solanum_lycopersicum|XP_004235665.1;Vitis_vinifera|XP_010654655.1;Oryza_sativa|XP_015610899.1;Arabidopsis_thaliana|NP_563967.1;Salvia_milt…
cluster13467	11	P46285	GO:0005986; P:sucrose biosynthetic process; IEA:EnsemblPlants	Clinopodium_gracile|Clgra_013967-T1;Coffea_canephora|CDP14065.1;Leonurus_japonicus|GWHPBQCV025820_mRNA=GWHTBQCV025820_Gene=GWHGBQCV025820_Position=GWHBQCV00000008:;Theobroma_cacao|XP_007009096.2;Tectona_grandis|Tg07g04590.t1;Amborella_trichopoda|XP_006827008.1;Vitis_vinifera|XP_002263049.1;Arabidopsis_thaliana|NP_191139.1;Salvia_miltiorrhiza|XP_057788938.1;Solanum_lycopersicum|NP_001234585.1;Oryz…
cluster13469	11	Q921Y2	GO:0006364; P:rRNA processing; IGI:MGI	Clinopodium_gracile|Clgra_005682-T1;Coffea_canephora|CDP02348.1;Leonurus_japonicus|GWHPBQCV016358_mRNA=GWHTBQCV016358_Gene=GWHGBQCV016358_Position=GWHBQCV00000005:;Theobroma_cacao|XP_007050887.1;Tectona_grandis|Tg07g06480.t1;Amborella_trichopoda|XP_006858645.1;Solanum_lycopersicum|NP_001335105.1;Vitis_vinifera|XP_002281732.1;Oryza_sativa|XP_015634044.1;Arabidopsis_thaliana|NP_568321.1;Salvia_milt…
cluster13470	11	Q3EC11	GO:0006612; P:protein targeting to membrane; IBA:GO_Central	Clinopodium_gracile|Clgra_005894-T1;Coffea_canephora|CDO97340.1;Leonurus_japonicus|GWHPBQCV021344_mRNA=GWHTBQCV021344_Gene=GWHGBQCV021344_Position=GWHBQCV00000007:;Theobroma_cacao|XP_007041468.2;Tectona_grandis|Tg12g11140.t3;Amborella_trichopoda|XP_006852720.1;Solanum_lycopersicum|XP_004230654.1;Vitis_vinifera|XP_002270505.1;Oryza_sativa|XP_015616408.1;Arabidopsis_thaliana|NP_973453.2;Salvia_milt…
cluster13471	11	N/A	N/A	Clinopodium_gracile|Clgra_025133-T1;Coffea_canephora|CDP08795.1;Leonurus_japonicus|GWHPBQCV003630_mRNA=GWHTBQCV003630_Gene=GWHGBQCV003630_Position=GWHBQCV00000010:;Theobroma_cacao|XP_007051770.1;Tectona_grandis|Tg06g01880.t1;Amborella_trichopoda|XP_006827563.1;Solanum_lycopersicum|XP_004248048.1;Vitis_vinifera|XP_002275895.1;Oryza_sativa|XP_015630209.2;Arabidopsis_thaliana|NP_566061.1;Salvia_milt…
cluster13472	11	Q94BS2	GO:0009611; P:response to wounding; IEP:TAIR	Clinopodium_gracile|Clgra_030767-T1;Coffea_canephora|CDP18584.1;Leonurus_japonicus|GWHPBQCV015402_mRNA=GWHTBQCV015402_Gene=GWHGBQCV015402_Position=GWHBQCV00000005:;Theobroma_cacao|XP_007014614.2;Tectona_grandis|Tg18g08890.t1;Amborella_trichopoda|XP_011622402.1;Solanum_lycopersicum|XP_004228646.1;Vitis_vinifera|XP_002285744.1;Oryza_sativa|XP_015647474.1;Arabidopsis_thaliana|NP_564691.1;Salvia_milt…
cluster13475	11	O82316	GO:0015250; F:water channel activity; IBA:GO_Central	Clinopodium_gracile|Clgra_023812-T1;Coffea_canephora|CDP16197.1;Leonurus_japonicus|GWHPBQCV009100_mRNA=GWHTBQCV009100_Gene=GWHGBQCV009100_Position=GWHBQCV00000003:;Theobroma_cacao|XP_007012110.1;Tectona_grandis|Tg05g02560.t1;Amborella_trichopoda|XP_006833429.1;Solanum_lycopersicum|NP_001289841.1;Vitis_vinifera|NP_001304062.1;Oryza_sativa|XP_015621438.1;Arabidopsis_thaliana|NP_180152.1;Salvia_milt…
cluster13476	11	Q38833	GO:0015995; P:chlorophyll biosynthetic process; IEA:UniProtKB-UniPathway	Clinopodium_gracile|Clgra_010381-T1;Coffea_canephora|CDP06461.1;Leonurus_japonicus|GWHPBQCV017912_mRNA=GWHTBQCV017912_Gene=GWHGBQCV017912_Position=GWHBQCV00000006:;Theobroma_cacao|XP_017977786.1;Tectona_grandis|Tg01g20240.t3;Amborella_trichopoda|XP_006843631.1;Solanum_lycopersicum|XP_004246318.1;Vitis_vinifera|XP_002263271.1;Oryza_sativa|XP_015637650.1;Arabidopsis_thaliana|NP_190750.1;Salvia_milt…
cluster13477	11	P35055	GO:0019353; P:protoporphyrinogen IX biosynthetic process from glutamate; IBA:GO_Central	Clinopodium_gracile|Clgra_003949-T1;Coffea_canephora|CDP04123.1;Leonurus_japonicus|GWHPBQCV001984_mRNA=GWHTBQCV001984_Gene=GWHGBQCV001984_Position=GWHBQCV00000001:;Theobroma_cacao|XP_007049078.2;Tectona_grandis|Tg02g20830.t1;Amborella_trichopoda|XP_006853529.1;Solanum_lycopersicum|XP_004248412.1;Vitis_vinifera|XP_002263190.1;Oryza_sativa|XP_015633531.1;Arabidopsis_thaliana|NP_171847.4;Salvia_milt…
cluster13479	11	Q9FMA1	GO:0009451; P:RNA modification; IBA:GO_Central	Clinopodium_gracile|Clgra_028566-T1;Coffea_canephora|CDP12006.1;Leonurus_japonicus|GWHPBQCV013869_mRNA=GWHTBQCV013869_Gene=GWHGBQCV013869_Position=GWHBQCV00000004:;Theobroma_cacao|XP_007019372.2;Tectona_grandis|Tg18g02360.t1;Amborella_trichopoda|XP_011628636.1;Solanum_lycopersicum|XP_004237759.1;Vitis_vinifera|XP_019072399.1;Arabidopsis_thaliana|NP_188784.3;Salvia_miltiorrhiza|XP_057773098.1;Oryz…
cluster13480	11	Q5ZML5	GO:0016070; P:RNA metabolic process; IBA:GO_Central	Clinopodium_gracile|Clgra_000151-T1;Coffea_canephora|CDP00201.1;Leonurus_japonicus|GWHPBQCV020373_mRNA=GWHTBQCV020373_Gene=GWHGBQCV020373_Position=GWHBQCV00000006:;Theobroma_cacao|XP_007044541.1;Tectona_grandis|Tg11g12730.t1;Amborella_trichopoda|XP_006836706.2;Solanum_lycopersicum|XP_004237256.1;Vitis_vinifera|XP_002269008.1;Oryza_sativa|XP_015622924.1;Arabidopsis_thaliana|NP_173816.2;Salvia_milt…
cluster13481	11	Q9ZUT3	GO:0010044; P:response to aluminum ion; IMP:TAIR	Clinopodium_gracile|Clgra_008712-T1;Coffea_canephora|CDP06676.1;Leonurus_japonicus|GWHPBQCV027770_mRNA=GWHTBQCV027770_Gene=GWHGBQCV027770_Position=GWHBQCV00000009:;Theobroma_cacao|XP_007027163.1;Tectona_grandis|Tg02g01150.t1;Amborella_trichopoda|XP_006828220.2;Solanum_lycopersicum|XP_004249666.1;Vitis_vinifera|XP_002274040.1;Oryza_sativa|XP_015637768.1;Arabidopsis_thaliana|NP_181270.1;Salvia_milt…
cluster13486	11	Q9FKC3	GO:0005739; C:mitochondrion; IBA:GO_Central	Clinopodium_gracile|Clgra_014566-T1;Coffea_canephora|CDP03883.1;Leonurus_japonicus|GWHPBQCV000249_mRNA=GWHTBQCV000249_Gene=GWHGBQCV000249_Position=GWHBQCV00000001:;Theobroma_cacao|XP_007049761.2;Tectona_grandis|Tg14g00870.t1;Amborella_trichopoda|XP_011625746.1;Solanum_lycopersicum|XP_004228653.1;Vitis_vinifera|XP_002269420.2;Oryza_sativa|XP_015641294.1;Arabidopsis_thaliana|NP_199684.2;Salvia_milt…
cluster13493	11	Q10058	GO:0042147; P:retrograde transport, endosome to Golgi; ISO:PomBase	Clinopodium_gracile|Clgra_007498-T1;Coffea_canephora|CDP15255.1;Leonurus_japonicus|GWHPBQCV022757_mRNA=GWHTBQCV022757_Gene=GWHGBQCV022757_Position=GWHBQCV00000007:;Theobroma_cacao|XP_007047394.2;Tectona_grandis|Tg09g05950.t1;Amborella_trichopoda|XP_006836433.3;Solanum_lycopersicum|XP_004234658.1;Vitis_vinifera|XP_002283580.1;Oryza_sativa|XP_015647386.1;Arabidopsis_thaliana|NP_201530.1;Salvia_milt…
cluster13495	11	Q9SPK5	GO:0035999; P:tetrahydrofolate interconversion; IEA:UniProtKB-UniPathway	Clinopodium_gracile|Clgra_017731-T1;Coffea_canephora|CDP17670.1;Leonurus_japonicus|GWHPBQCV004451_mRNA=GWHTBQCV004451_Gene=GWHGBQCV004451_Position=GWHBQCV00000010:;Theobroma_cacao|XP_017984778.1;Tectona_grandis|Tg05g11510.t1;Amborella_trichopoda|XP_006849543.1;Solanum_lycopersicum|XP_004228600.1;Vitis_vinifera|XP_002285654.1;Oryza_sativa|XP_015612110.1;Arabidopsis_thaliana|NP_564571.1;Salvia_milt…
cluster13496	11	N/A	N/A	Clinopodium_gracile|Clgra_024025-T1;Coffea_canephora|CDP07912.1;Leonurus_japonicus|GWHPBQCV009257_mRNA=GWHTBQCV009257_Gene=GWHGBQCV009257_Position=GWHBQCV00000003:;Theobroma_cacao|XP_017983436.1;Tectona_grandis|TgUn338g00040.t1;Amborella_trichopoda|XP_006845416.1;Solanum_lycopersicum|XP_004244697.1;Vitis_vinifera|XP_002285577.1;Oryza_sativa|XP_015642560.1;Arabidopsis_thaliana|NP_565581.1;Salvia_m…
cluster13501	11	Q9FIJ2	GO:0055114; P:oxidation-reduction process; IEA:UniProtKB-KW	Clinopodium_gracile|Clgra_016778-T1;Coffea_canephora|CDP09007.1;Leonurus_japonicus|GWHPBQCV013228_mRNA=GWHTBQCV013228_Gene=GWHGBQCV013228_Position=GWHBQCV00000004:;Theobroma_cacao|XP_007015506.1;Tectona_grandis|Tg14g04950.t1;Amborella_trichopoda|XP_006844759.1;Solanum_lycopersicum|XP_004241241.1;Vitis_vinifera|XP_002275228.1;Oryza_sativa|XP_015633769.1;Arabidopsis_thaliana|NP_199600.1;Salvia_milt…
cluster13502	11	F4I532	GO:0016149; F:translation release factor activity, codon specific; IEA:InterPro	Clinopodium_gracile|Clgra_011125-T1;Coffea_canephora|CDP18244.1;Leonurus_japonicus|GWHPBQCV020941_mRNA=GWHTBQCV020941_Gene=GWHGBQCV020941_Position=GWHBQCV00000007:;Theobroma_cacao|XP_007031142.2;Tectona_grandis|Tg08g11210.t1;Amborella_trichopoda|XP_011627360.1;Solanum_lycopersicum|XP_004230303.1;Vitis_vinifera|XP_002277995.2;Oryza_sativa|XP_015630647.1;Arabidopsis_thaliana|NP_176032.2;Salvia_milt…
cluster13503	11	Q9M1X2	GO:0006631; P:fatty acid metabolic process; IMP:TAIR	Clinopodium_gracile|Clgra_033168-T1;Coffea_canephora|CDP03635.1;Leonurus_japonicus|GWHPBQCV008451_mRNA=GWHTBQCV008451_Gene=GWHGBQCV008451_Position=GWHBQCV00000002:;Theobroma_cacao|XP_017977137.1;Tectona_grandis|Tg14g12750.t1;Amborella_trichopoda|XP_006838250.1;Solanum_lycopersicum|XP_004242334.1;Vitis_vinifera|XP_002278163.1;Oryza_sativa|XP_015645628.1;Arabidopsis_thaliana|NP_567140.1;Salvia_milt…
cluster13510	11	Q94BY4	GO:0006486; P:protein glycosylation; IEA:UniProtKB-UniPathway	Clinopodium_gracile|Clgra_022618-T1;Coffea_canephora|CDP03096.1;Leonurus_japonicus|GWHPBQCV005438_mRNA=GWHTBQCV005438_Gene=GWHGBQCV005438_Position=GWHBQCV00000010:;Theobroma_cacao|XP_007012656.2;Tectona_grandis|Tg01g11330.t2;Amborella_trichopoda|XP_011625367.1;Solanum_lycopersicum|XP_004243713.1;Vitis_vinifera|XP_002279041.1;Oryza_sativa|XP_015612643.1;Arabidopsis_thaliana|NP_568528.2;Salvia_milt…
cluster13514	11	Q9LS25	GO:0009507; C:chloroplast; IDA:TAIR	Clinopodium_gracile|Clgra_001005-T1;Coffea_canephora|CDP12991.1;Leonurus_japonicus|GWHPBQCV010009_mRNA=GWHTBQCV010009_Gene=GWHGBQCV010009_Position=GWHBQCV00000003:;Theobroma_cacao|XP_017973220.1;Tectona_grandis|Tg16g05870.t1;Amborella_trichopoda|XP_020524854.1;Solanum_lycopersicum|XP_004245879.1;Vitis_vinifera|XP_002278451.1;Oryza_sativa|XP_015631135.1;Arabidopsis_thaliana|NP_199470.1;Salvia_milt…
cluster13515	11	Q80UU1	GO:0030433; P:ubiquitin-dependent ERAD pathway; IBA:GO_Central	Clinopodium_gracile|Clgra_025333-T1;Coffea_canephora|CDP17791.1;Leonurus_japonicus|GWHPBQCV003762_mRNA=GWHTBQCV003762_Gene=GWHGBQCV003762_Position=GWHBQCV00000010:;Theobroma_cacao|XP_017969835.1;Tectona_grandis|Tg06g03430.t2;Amborella_trichopoda|XP_006858020.3;Solanum_lycopersicum|XP_004229826.1;Vitis_vinifera|XP_002270342.1;Oryza_sativa|XP_015636890.1;Arabidopsis_thaliana|NP_563641.1;Salvia_milt…
cluster13517	11	Q07204	GO:0019253; P:reductive pentose-phosphate cycle; IEA:UniProtKB-UniPathway	Clinopodium_gracile|Clgra_014979-T1;Coffea_canephora|CDO97383.1;Leonurus_japonicus|GWHPBQCV020720_mRNA=GWHTBQCV020720_Gene=GWHGBQCV020720_Position=GWHBQCV00000007:;Theobroma_cacao|XP_007042824.2;Tectona_grandis|Tg08g14270.t1;Amborella_trichopoda|XP_006852921.2;Solanum_lycopersicum|XP_004230574.1;Vitis_vinifera|XP_002270826.2;Oryza_sativa|XP_015642873.1;Arabidopsis_thaliana|NP_201243.1;Salvia_milt…
cluster13520	11	Q9C9U0	GO:0005739; C:mitochondrion; IBA:GO_Central	Clinopodium_gracile|Clgra_032620-T1;Coffea_canephora|CDP14720.1;Leonurus_japonicus|GWHPBQCV017491_mRNA=GWHTBQCV017491_Gene=GWHGBQCV017491_Position=GWHBQCV00000005:;Theobroma_cacao|XP_007043514.2;Tectona_grandis|Tg17g13430.t1;Amborella_trichopoda|XP_006841750.2;Solanum_lycopersicum|XP_004243803.1;Vitis_vinifera|XP_002272784.1;Oryza_sativa|XP_015644749.1;Arabidopsis_thaliana|NP_177512.1;Salvia_milt…
cluster13524	11	Q6ZJ48	GO:0005524; F:ATP binding; IEA:UniProtKB-KW	Clinopodium_gracile|Clgra_034857-T1;Coffea_canephora|CDP16677.1;Leonurus_japonicus|GWHPBQCV024188_mRNA=GWHTBQCV024188_Gene=GWHGBQCV024188_Position=GWHBQCV00000007:;Theobroma_cacao|XP_007031810.2;Tectona_grandis|Tg09g12970.t4;Solanum_lycopersicum|NP_001335306.1;Vitis_vinifera|XP_002263142.1;Oryza_sativa|XP_015648647.1;Arabidopsis_thaliana|NP_186831.2;Salvia_miltiorrhiza|XP_057766954.1;Amborella_tr…
cluster13527	11	P41891	GO:0006364; P:rRNA processing; IMP:PomBase	Clinopodium_gracile|Clgra_027354-T1;Coffea_canephora|CDP00042.1;Leonurus_japonicus|GWHPBQCV004390_mRNA=GWHTBQCV004390_Gene=GWHGBQCV004390_Position=GWHBQCV00000010:;Theobroma_cacao|XP_017985000.1;Tectona_grandis|Tg07g10030.t1;Amborella_trichopoda|XP_006848692.1;Solanum_lycopersicum|NP_001305061.1;Vitis_vinifera|XP_002279438.1;Oryza_sativa|XP_015640419.1;Arabidopsis_thaliana|NP_191094.1;Salvia_milt…
cluster13531	11	Q9SZ15	GO:0016192; P:vesicle-mediated transport; IPI:TAIR	Clinopodium_gracile|Clgra_003939-T1;Coffea_canephora|CDP13777.1;Leonurus_japonicus|GWHPBQCV001903_mRNA=GWHTBQCV001903_Gene=GWHGBQCV001903_Position=GWHBQCV00000001:;Theobroma_cacao|XP_007020695.2;Tectona_grandis|Tg02g07900.t1;Amborella_trichopoda|XP_006839055.1;Solanum_lycopersicum|NP_001315322.1;Vitis_vinifera|XP_002277187.1;Oryza_sativa|XP_015644354.1;Arabidopsis_thaliana|NP_194405.1;Salvia_milt…
cluster13533	11	E0CTY1	GO:0032543; P:mitochondrial translation; IEA:UniProtKB-UniRule	Clinopodium_gracile|Clgra_032763-T1;Coffea_canephora|CDP18737.1;Leonurus_japonicus|GWHPBQCV017370_mRNA=GWHTBQCV017370_Gene=GWHGBQCV017370_Position=GWHBQCV00000005:;Theobroma_cacao|XP_017984541.1;Tectona_grandis|Tg17g11610.t1;Amborella_trichopoda|XP_006832840.1;Solanum_lycopersicum|XP_004248204.1;Vitis_vinifera|XP_002278150.1;Oryza_sativa|XP_025880871.1;Arabidopsis_thaliana|NP_189194.1;Salvia_milt…
cluster13538	11	Q8VZE7	GO:0006952; P:defense response; IEA:UniProtKB-KW	Clinopodium_gracile|Clgra_028176-T1;Coffea_canephora|CDP19087.1;Leonurus_japonicus|GWHPBQCV011113_mRNA=GWHTBQCV011113_Gene=GWHGBQCV011113_Position=GWHBQCV00000003:;Theobroma_cacao|XP_007026471.2;Tectona_grandis|Tg10g00920.t1;Amborella_trichopoda|XP_006858700.2;Solanum_lycopersicum|XP_019067090.1;Vitis_vinifera|XP_002276208.1;Oryza_sativa|XP_015628330.1;Arabidopsis_thaliana|NP_850176.1;Salvia_milt…
cluster13539	11	Q96519	GO:0048511; P:rhythmic process; IEA:UniProtKB-KW	Clinopodium_gracile|Clgra_032043-T1;Coffea_canephora|CDP00515.1;Leonurus_japonicus|GWHPBQCV028355_mRNA=GWHTBQCV028355_Gene=GWHGBQCV028355_Position=GWHBQCV00000009:;Theobroma_cacao|XP_007045678.2;Tectona_grandis|Tg15g12590.t2;Amborella_trichopoda|XP_006844165.1;Solanum_lycopersicum|XP_004238993.1;Vitis_vinifera|XP_002270660.1;Oryza_sativa|XP_015641505.1;Arabidopsis_thaliana|NP_564948.1;Salvia_milt…
cluster13548	11	Q93W77	GO:0097428; P:protein maturation by iron-sulfur cluster transfer; IBA:GO_Central	Clinopodium_gracile|Clgra_031070-T1;Coffea_canephora|CDP17047.1;Leonurus_japonicus|GWHPBQCV008750_mRNA=GWHTBQCV008750_Gene=GWHGBQCV008750_Position=GWHBQCV00000002:;Theobroma_cacao|XP_007051197.2;Tectona_grandis|Tg14g15600.t1;Amborella_trichopoda|XP_006841473.2;Solanum_lycopersicum|XP_004229373.1;Vitis_vinifera|XP_002278510.1;Oryza_sativa|XP_015628757.1;Arabidopsis_thaliana|NP_567219.1;Salvia_milt…
cluster13550	11	N/A	N/A	Clinopodium_gracile|Clgra_027363-T1;Coffea_canephora|CDP02038.1;Leonurus_japonicus|GWHPBQCV020041_mRNA=GWHTBQCV020041_Gene=GWHGBQCV020041_Position=GWHBQCV00000006:;Theobroma_cacao|XP_017978089.1;Tectona_grandis|Tg07g09980.t1;Amborella_trichopoda|XP_006856042.2;Solanum_lycopersicum|XP_004234559.1;Vitis_vinifera|XP_002270634.1;Oryza_sativa|XP_015613369.1;Arabidopsis_thaliana|NP_566937.1;Salvia_milt…
cluster13551	11	N/A	N/A	Clinopodium_gracile|Clgra_009907-T1;Coffea_canephora|CDP01728.1;Leonurus_japonicus|GWHPBQCV020165_mRNA=GWHTBQCV020165_Gene=GWHGBQCV020165_Position=GWHBQCV00000006:;Theobroma_cacao|XP_017975143.1;Tectona_grandis|Tg07g11810.t1;Amborella_trichopoda|XP_006841547.1;Solanum_lycopersicum|XP_004232651.1;Vitis_vinifera|XP_002264628.1;Oryza_sativa|XP_015639552.1;Arabidopsis_thaliana|NP_566181.1;Salvia_milt…
cluster13552	11	Q6DGL7	GO:0016021; C:integral component of membrane; IEA:UniProtKB-KW	Clinopodium_gracile|Clgra_020536-T1;Coffea_canephora|CDP07596.1;Leonurus_japonicus|GWHPBQCV013677_mRNA=GWHTBQCV013677_Gene=GWHGBQCV013677_Position=GWHBQCV00000004:;Theobroma_cacao|XP_007017400.1;Tectona_grandis|Tg18g04670.t1;Amborella_trichopoda|XP_011627739.1;Solanum_lycopersicum|XP_004252777.1;Vitis_vinifera|XP_002284036.1;Oryza_sativa|XP_015630520.1;Arabidopsis_thaliana|NP_564509.1;Salvia_milt…
cluster13553	11	Q9SIH1	GO:0000413; P:protein peptidyl-prolyl isomerization; IBA:GO_Central	Clinopodium_gracile|Clgra_010685-T1;Coffea_canephora|CDP10639.1;Leonurus_japonicus|GWHPBQCV017644_mRNA=GWHTBQCV017644_Gene=GWHGBQCV017644_Position=GWHBQCV00000006:;Theobroma_cacao|XP_007027839.1;Tectona_grandis|Tg01g17790.t1;Amborella_trichopoda|XP_006851476.1;Solanum_lycopersicum|XP_004246483.1;Vitis_vinifera|XP_002281866.1;Oryza_sativa|XP_015649749.1;Arabidopsis_thaliana|NP_181157.1;Salvia_milt…
cluster13572	11	Q9FG37	GO:0009624; P:response to nematode; IDA:UniProtKB	Clinopodium_gracile|Clgra_023521-T1;Coffea_canephora|CDP10165.1;Leonurus_japonicus|GWHPBQCV014677_mRNA=GWHTBQCV014677_Gene=GWHGBQCV014677_Position=GWHBQCV00000004:;Theobroma_cacao|XP_017977750.1;Tectona_grandis|Tg01g00770.t1;Amborella_trichopoda|XP_020526076.1;Solanum_lycopersicum|XP_010325937.1;Vitis_vinifera|XP_002275839.1;Oryza_sativa|XP_015612607.1;Arabidopsis_thaliana|NP_196286.1;Salvia_milt…
cluster13575	11	Q9SWB6	GO:0009229; P:thiamine diphosphate biosynthetic process; IEA:UniProtKB-UniPathway	Clinopodium_gracile|Clgra_028611-T1;Coffea_canephora|CDO98777.1;Leonurus_japonicus|GWHPBQCV005706_mRNA=GWHTBQCV005706_Gene=GWHGBQCV005706_Position=GWHBQCV00000010:;Theobroma_cacao|XP_007035775.2;Tectona_grandis|Tg08g00740.t1;Amborella_trichopoda|XP_011621896.1;Solanum_lycopersicum|XP_010312567.1;Vitis_vinifera|XP_010649525.1;Oryza_sativa|XP_015631798.1;Arabidopsis_thaliana|NP_188324.1;Salvia_milt…
cluster13579	11	N/A	N/A	Clinopodium_gracile|Clgra_017434-T1;Coffea_canephora|CDP13341.1;Leonurus_japonicus|GWHPBQCV007210_mRNA=GWHTBQCV007210_Gene=GWHGBQCV007210_Position=GWHBQCV00000002:;Theobroma_cacao|XP_007044016.2;Tectona_grandis|Tg15g03800.t1;Amborella_trichopoda|XP_011624885.1;Solanum_lycopersicum|XP_004239212.1;Vitis_vinifera|XP_003631355.1;Oryza_sativa|XP_015623379.1;Arabidopsis_thaliana|NP_568623.1;Salvia_milt…
cluster13585	11	Q0WT24	GO:0010200; P:response to chitin; IEP:TAIR	Clinopodium_gracile|Clgra_020029-T1;Coffea_canephora|CDP07024.1;Leonurus_japonicus|GWHPBQCV015553_mRNA=GWHTBQCV015553_Gene=GWHGBQCV015553_Position=GWHBQCV00000005:;Theobroma_cacao|XP_007016060.2;Tectona_grandis|Tg18g10480.t1;Amborella_trichopoda|XP_006843103.1;Solanum_lycopersicum|XP_004250985.1;Vitis_vinifera|XP_010651763.1;Oryza_sativa|XP_015649514.1;Arabidopsis_thaliana|NP_197680.2;Salvia_milt…
cluster13587	11	N/A	N/A	Clinopodium_gracile|Clgra_011613-T1;Coffea_canephora|CDO98255.1;Leonurus_japonicus|GWHPBQCV012314_mRNA=GWHTBQCV012314_Gene=GWHGBQCV012314_Position=GWHBQCV00000004:;Theobroma_cacao|XP_007023535.2;Tectona_grandis|Tg16g09910.t2;Amborella_trichopoda|XP_011623779.1;Solanum_lycopersicum|XP_004235881.1;Vitis_vinifera|XP_002271931.1;Oryza_sativa|XP_015651017.1;Arabidopsis_thaliana|NP_563991.1;Salvia_milt…
cluster13589	11	Q9ZW34	GO:0006096; P:glycolytic process; IEA:UniProtKB-UniPathway	Clinopodium_gracile|Clgra_016813-T1;Coffea_canephora|CDP09137.1;Leonurus_japonicus|GWHPBQCV013259_mRNA=GWHTBQCV013259_Gene=GWHGBQCV013259_Position=GWHBQCV00000004:;Theobroma_cacao|XP_007016213.1;Tectona_grandis|Tg14g04730.t1;Amborella_trichopoda|XP_011624704.1;Solanum_lycopersicum|XP_004241185.1;Vitis_vinifera|XP_002281136.1;Oryza_sativa|XP_015630469.1;Arabidopsis_thaliana|NP_180516.1;Salvia_milt…
cluster13590	11	Q9FK33	GO:0009451; P:RNA modification; IBA:GO_Central	Clinopodium_gracile|Clgra_011799-T1;Coffea_canephora|CDP10821.1;Leonurus_japonicus|GWHPBQCV012539_mRNA=GWHTBQCV012539_Gene=GWHGBQCV012539_Position=GWHBQCV00000004:;Theobroma_cacao|XP_007037975.2;Tectona_grandis|Tg16g08660.t1;Amborella_trichopoda|XP_011621060.2;Solanum_lycopersicum|XP_004243699.1;Vitis_vinifera|XP_002280013.1;Oryza_sativa|XP_015649176.2;Arabidopsis_thaliana|NP_199850.1;Salvia_milt…
cluster13595	11	J9U5U9	GO:1901601; P:strigolactone biosynthetic process; IDA:UniProtKB	Clinopodium_gracile|Clgra_020435-T1;Coffea_canephora|CDP01202.1;Leonurus_japonicus|GWHPBQCV014052_mRNA=GWHTBQCV014052_Gene=GWHGBQCV014052_Position=GWHBQCV00000004:;Theobroma_cacao|XP_007018509.2;Tectona_grandis|Tg08g09910.t1;Amborella_trichopoda|XP_006849318.1;Solanum_lycopersicum|XP_004238093.1;Vitis_vinifera|XP_010664515.1;Oryza_sativa|XP_015631400.1;Arabidopsis_thaliana|NP_566220.1;Salvia_milt…
cluster13598	11	Q56XQ6	GO:0015333; F:peptide:proton symporter activity; IBA:GO_Central	Clinopodium_gracile|Clgra_037540-T1;Coffea_canephora|CDP11530.1;Leonurus_japonicus|GWHPBQCV018748_mRNA=GWHTBQCV018748_Gene=GWHGBQCV018748_Position=GWHBQCV00000006:;Theobroma_cacao|XP_017980872.1;Tectona_grandis|Tg03g13750.t1;Amborella_trichopoda|XP_006836895.1;Solanum_lycopersicum|XP_004250721.1;Vitis_vinifera|XP_002265350.3;Oryza_sativa|XP_015615524.1;Arabidopsis_thaliana|NP_174610.2;Salvia_milt…
cluster13599	11	O23429	GO:0016192; P:vesicle-mediated transport; IEA:InterPro	Clinopodium_gracile|Clgra_037693-T1;Leonurus_japonicus|GWHPBQCV024351_mRNA=GWHTBQCV024351_Gene=GWHGBQCV024351_Position=GWHBQCV00000008:;Tectona_grandis|Tg04g02700.t1;Arabidopsis_thaliana|NP_193313.6;Salvia_miltiorrhiza|XP_057772326.1;Theobroma_cacao|XP_007035565.1;Coffea_canephora|CDP19534.1;Amborella_trichopoda|XP_006855544.1;Solanum_lycopersicum|XP_004229234.1;Vitis_vinifera|XP_002273101.1;Oryz…
cluster13600	11	Q8BUV8	GO:0072583; P:clathrin-dependent endocytosis; IMP:MGI	Clinopodium_gracile|Clgra_000733-T1;Coffea_canephora|CDP12235.1;Leonurus_japonicus|GWHPBQCV011980_mRNA=GWHTBQCV011980_Gene=GWHGBQCV011980_Position=GWHBQCV00000003:;Theobroma_cacao|XP_007039375.2;Tectona_grandis|Tg11g07350.t1;Amborella_trichopoda|XP_006846584.1;Solanum_lycopersicum|XP_004244659.3;Vitis_vinifera|XP_002279642.1;Oryza_sativa|XP_015643947.1;Arabidopsis_thaliana|NP_199024.1;Salvia_milt…
cluster13615	11	Q9FJZ3	GO:0009845; P:seed germination; IMP:TAIR	Arabidopsis_thaliana|NP_201447.1;Coffea_canephora|CDP01989.1;Leonurus_japonicus|GWHPBQCV022844_mRNA=GWHTBQCV022844_Gene=GWHGBQCV022844_Position=GWHBQCV00000007:;Theobroma_cacao|XP_007046871.2;Tectona_grandis|Tg09g12480.t1;Amborella_trichopoda|XP_011623587.1;Solanum_lycopersicum|XP_004232427.1;Clinopodium_gracile|Clgra_035461-T1;Vitis_vinifera|XP_002264115.1;Oryza_sativa|XP_015621908.1;Salvia_milt…
cluster13616	11	O81845	GO:0009853; P:photorespiration; IMP:TAIR	Arabidopsis_thaliana|NP_190979.1;Coffea_canephora|CDP06526.1;Theobroma_cacao|XP_007026812.2;Tectona_grandis|Tg13g11890.t1;Amborella_trichopoda|XP_011624710.1;Solanum_lycopersicum|NP_001234584.1;Clinopodium_gracile|Clgra_010074-T1;Vitis_vinifera|XP_002277421.1;Oryza_sativa|XP_015616794.1;Salvia_miltiorrhiza|XP_057801291.1;Leonurus_japonicus|GWHPBQCV027686_mRNA=GWHTBQCV027686_Gene=GWHGBQCV027686_Po…
cluster13617	11	Q9LIG0	GO:0016702; F:oxidoreductase activity, acting on single donors with incorporation of molecular oxygen, incorporation of two atoms of oxygen; IBA:GO_Central	Arabidopsis_thaliana|NP_188773.1;Coffea_canephora|CDO97972.1;Leonurus_japonicus|GWHPBQCV016051_mRNA=GWHTBQCV016051_Gene=GWHGBQCV016051_Position=GWHBQCV00000005:;Theobroma_cacao|XP_007024316.2;Tectona_grandis|Tg10g14070.t1;Amborella_trichopoda|XP_006853694.1;Solanum_lycopersicum|XP_004236398.2;Clinopodium_gracile|Clgra_007095-T1;Vitis_vinifera|XP_002283642.1;Oryza_sativa|XP_015623695.1;Salvia_milt…
cluster13619	11	P42620	GO:0016672; F:oxidoreductase activity, acting on a sulfur group of donors, quinone or similar compound as acceptor; IDA:EcoCyc	Arabidopsis_thaliana|NP_568632.1;Coffea_canephora|CDP03788.1;Leonurus_japonicus|GWHPBQCV004367_mRNA=GWHTBQCV004367_Gene=GWHGBQCV004367_Position=GWHBQCV00000010:;Theobroma_cacao|XP_007050183.2;Tectona_grandis|Tg05g10960.t1;Amborella_trichopoda|XP_006857498.3;Solanum_lycopersicum|XP_004242372.1;Clinopodium_gracile|Clgra_017990-T1;Vitis_vinifera|XP_002270355.2;Oryza_sativa|XP_015625814.1;Salvia_milt…
cluster13621	11	Q8H1D2	GO:0009733; P:response to auxin; IEP:TAIR	Arabidopsis_thaliana|NP_187735.2;Coffea_canephora|CDP14053.1;Leonurus_japonicus|GWHPBQCV006451_mRNA=GWHTBQCV006451_Gene=GWHGBQCV006451_Position=GWHBQCV00000002:;Theobroma_cacao|XP_007009082.1;Tectona_grandis|Tg12g05480.t1;Amborella_trichopoda|XP_006848137.2;Solanum_lycopersicum|XP_025886095.1;Clinopodium_gracile|Clgra_014363-T1;Vitis_vinifera|XP_019080117.1;Oryza_sativa|XP_015642985.1;Salvia_milt…
cluster13622	11	Q9XJ35	GO:0006364; P:rRNA processing; IMP:UniProtKB	Arabidopsis_thaliana|NP_564560.1;Coffea_canephora|CDO97271.1;Leonurus_japonicus|GWHPBQCV020713_mRNA=GWHTBQCV020713_Gene=GWHGBQCV020713_Position=GWHBQCV00000007:;Theobroma_cacao|XP_007042627.2;Tectona_grandis|Tg08g14870.t1;Amborella_trichopoda|XP_006849346.1;Solanum_lycopersicum|XP_004248765.1;Clinopodium_gracile|Clgra_015045-T1;Vitis_vinifera|XP_002264383.1;Oryza_sativa|XP_015640771.1;Salvia_milt…
cluster13624	11	Q9SCQ7	GO:0042393; F:histone binding; IBA:GO_Central	Arabidopsis_thaliana|NP_190638.1;Coffea_canephora|CDP02040.1;Leonurus_japonicus|GWHPBQCV020042_mRNA=GWHTBQCV020042_Gene=GWHGBQCV020042_Position=GWHBQCV00000006:;Theobroma_cacao|XP_007046977.2;Tectona_grandis|Tg07g09990.t1;Amborella_trichopoda|XP_006856043.1;Solanum_lycopersicum|XP_004234560.1;Clinopodium_gracile|Clgra_027362-T1;Vitis_vinifera|XP_002270711.1;Oryza_sativa|XP_015646557.1;Salvia_milt…
cluster13625	11	O81020	GO:0009395; P:phospholipid catabolic process; IBA:GO_Central	Arabidopsis_thaliana|NP_180255.1;Coffea_canephora|CDP08441.1;Leonurus_japonicus|GWHPBQCV007894_mRNA=GWHTBQCV007894_Gene=GWHGBQCV007894_Position=GWHBQCV00000002:;Theobroma_cacao|XP_017982742.1;Tectona_grandis|Tg14g08790.t1;Amborella_trichopoda|XP_006854823.2;Solanum_lycopersicum|XP_004228500.1;Clinopodium_gracile|Clgra_016378-T1;Vitis_vinifera|XP_002276163.1;Oryza_sativa|XP_015623428.1;Salvia_milt…
cluster13627	11	Q9FLZ9	GO:0009451; P:RNA modification; IBA:GO_Central	Arabidopsis_thaliana|NP_198751.1;Coffea_canephora|CDP02300.1;Leonurus_japonicus|GWHPBQCV019253_mRNA=GWHTBQCV019253_Gene=GWHGBQCV019253_Position=GWHBQCV00000006:;Theobroma_cacao|XP_007032683.2;Tectona_grandis|Tg09g16340.t1;Amborella_trichopoda|XP_011621058.2;Solanum_lycopersicum|XP_004233668.1;Clinopodium_gracile|Clgra_035353-T1;Vitis_vinifera|XP_002279032.1;Oryza_sativa|XP_015622815.1;Salvia_milt…
cluster13629	11	N/A	N/A	Arabidopsis_thaliana|NP_563747.1;Coffea_canephora|CDP10869.1;Leonurus_japonicus|GWHPBQCV025207_mRNA=GWHTBQCV025207_Gene=GWHGBQCV025207_Position=GWHBQCV00000008:;Theobroma_cacao|XP_007033747.1;Tectona_grandis|Tg04g14530.t1;Amborella_trichopoda|XP_006858892.1;Solanum_lycopersicum|NP_001334106.1;Clinopodium_gracile|Clgra_009211-T1;Vitis_vinifera|XP_002273955.1;Oryza_sativa|XP_015621692.1;Salvia_milt…
cluster13632	11	N/A	N/A	Arabidopsis_thaliana|NP_566953.1;Coffea_canephora|CDP06396.1;Leonurus_japonicus|GWHPBQCV016157_mRNA=GWHTBQCV016157_Gene=GWHGBQCV016157_Position=GWHBQCV00000005:;Theobroma_cacao|XP_007033557.1;Tectona_grandis|Tg01g21160.t2;Amborella_trichopoda|XP_011623068.1;Solanum_lycopersicum|XP_004235790.1;Clinopodium_gracile|Clgra_010286-T1;Vitis_vinifera|XP_002270471.1;Oryza_sativa|XP_015637595.1;Salvia_milt…
cluster13633	11	N/A	N/A	Arabidopsis_thaliana|NP_568965.1;Coffea_canephora|CDP12736.1;Leonurus_japonicus|GWHPBQCV010480_mRNA=GWHTBQCV010480_Gene=GWHGBQCV010480_Position=GWHBQCV00000003:;Theobroma_cacao|XP_007036380.2;Tectona_grandis|Tg10g02560.t1;Amborella_trichopoda|XP_006852331.1;Solanum_lycopersicum|XP_004236262.1;Clinopodium_gracile|Clgra_028014-T1;Vitis_vinifera|XP_002280825.1;Oryza_sativa|XP_015626496.1;Salvia_milt…
cluster13636	11	Q9ZRZ8	GO:0003723; F:RNA binding; IEA:UniProtKB-KW	Arabidopsis_thaliana|NP_193396.3;Coffea_canephora|CDP19995.1;Leonurus_japonicus|GWHPBQCV018866_mRNA=GWHTBQCV018866_Gene=GWHGBQCV018866_Position=GWHBQCV00000006:;Theobroma_cacao|XP_007017831.1;Tectona_grandis|Tg03g03780.t2;Amborella_trichopoda|XP_006830301.2;Solanum_lycopersicum|XP_004238369.1;Clinopodium_gracile|Clgra_036772-T1;Vitis_vinifera|XP_002273443.1;Oryza_sativa|XP_015620340.1;Salvia_milt…
cluster13639	11	Q9FM67	GO:0015031; P:protein transport; IEA:UniProtKB-KW	Arabidopsis_thaliana|NP_200382.1;Coffea_canephora|CDP13718.1;Leonurus_japonicus|GWHPBQCV002342_mRNA=GWHTBQCV002342_Gene=GWHGBQCV002342_Position=GWHBQCV00000001:;Theobroma_cacao|XP_017980168.1;Tectona_grandis|Tg02g08950.t1;Amborella_trichopoda|XP_006844076.2;Solanum_lycopersicum|XP_004251935.1;Clinopodium_gracile|Clgra_003823-T1;Vitis_vinifera|XP_002267869.1;Oryza_sativa|XP_015627561.1;Salvia_milt…
cluster13640	11	Q9SEX2	GO:0010091; P:trichome branching; IMP:TAIR	Arabidopsis_thaliana|NP_178151.1;Coffea_canephora|CDO98086.1;Leonurus_japonicus|GWHPBQCV010379_mRNA=GWHTBQCV010379_Gene=GWHGBQCV010379_Position=GWHBQCV00000003:;Theobroma_cacao|XP_017979451.1;Tectona_grandis|Tg10g12540.t1;Amborella_trichopoda|XP_020517508.1;Solanum_lycopersicum|XP_004241721.1;Clinopodium_gracile|Clgra_007375-T1;Vitis_vinifera|XP_019077955.1;Oryza_sativa|XP_015622511.1;Salvia_milt…
cluster13644	11	Q9C8E6	GO:0006970; P:response to osmotic stress; TAS:UniProtKB	Arabidopsis_thaliana|NP_174979.5;Coffea_canephora|CDP07263.1;Leonurus_japonicus|GWHPBQCV007352_mRNA=GWHTBQCV007352_Gene=GWHGBQCV007352_Position=GWHBQCV00000002:;Theobroma_cacao|XP_017977505.1;Tectona_grandis|Tg03g14380.t1;Amborella_trichopoda|XP_006855642.1;Solanum_lycopersicum|XP_010327172.1;Clinopodium_gracile|Clgra_039192-T1;Vitis_vinifera|XP_002273127.1;Oryza_sativa|XP_015611845.1;Salvia_milt…
cluster13645	11	Q6Z1Y6	GO:0030187; P:melatonin biosynthetic process; IDA:UniProtKB	Arabidopsis_thaliana|NP_173946.1;Coffea_canephora|CDP00509.1;Leonurus_japonicus|GWHPBQCV028351_mRNA=GWHTBQCV028351_Gene=GWHGBQCV028351_Position=GWHBQCV00000009:;Theobroma_cacao|XP_007045686.2;Tectona_grandis|Tg15g12560.t1;Amborella_trichopoda|XP_006843307.1;Solanum_lycopersicum|XP_004238988.1;Clinopodium_gracile|Clgra_032038-T1;Vitis_vinifera|XP_002271276.1;Oryza_sativa|XP_015648698.1;Salvia_milt…
cluster13650	11	Q9SZT4	GO:0006623; P:protein targeting to vacuole; IMP:TAIR	Arabidopsis_thaliana|NP_195312.1;Coffea_canephora|CDP01848.1;Leonurus_japonicus|GWHPBQCV007782_mRNA=GWHTBQCV007782_Gene=GWHGBQCV007782_Position=GWHBQCV00000002:;Theobroma_cacao|XP_007046604.2;Tectona_grandis|Tg14g08360.t1;Amborella_trichopoda|XP_006828780.1;Solanum_lycopersicum|XP_004232520.1;Clinopodium_gracile|Clgra_016438-T1;Vitis_vinifera|XP_019074015.1;Oryza_sativa|XP_015632735.1;Salvia_milt…
cluster13660	11	Q9SKC9	GO:0009853; P:photorespiration; TAS:TAIR	Arabidopsis_thaliana|NP_565280.1;Coffea_canephora|CDP05403.1;Leonurus_japonicus|GWHPBQCV011844_mRNA=GWHTBQCV011844_Gene=GWHGBQCV011844_Position=GWHBQCV00000003:;Theobroma_cacao|XP_007045392.2;Tectona_grandis|Tg11g08240.t1;Amborella_trichopoda|XP_006855582.1;Solanum_lycopersicum|NP_001316356.1;Clinopodium_gracile|Clgra_000631-T1;Vitis_vinifera|XP_002285291.1;Oryza_sativa|XP_015627988.1;Salvia_milt…
cluster13661	11	Q9M9F0	GO:1901001; P:negative regulation of response to salt stress; IMP:UniProtKB	Arabidopsis_thaliana|NP_565177.1;Coffea_canephora|CDP01099.1;Leonurus_japonicus|GWHPBQCV019673_mRNA=GWHTBQCV019673_Gene=GWHGBQCV019673_Position=GWHBQCV00000006:;Theobroma_cacao|XP_017980782.1;Tectona_grandis|Tg03g16870.t1;Amborella_trichopoda|XP_006829932.2;Solanum_lycopersicum|XP_004237937.1;Clinopodium_gracile|Clgra_039694-T1;Vitis_vinifera|XP_002284066.1;Oryza_sativa|XP_015627853.1;Salvia_milt…
cluster13662	11	Q9LVW6	GO:0006397; P:mRNA processing; IEA:UniProtKB-KW	Arabidopsis_thaliana|NP_189412.1;Coffea_canephora|CDO98009.1;Leonurus_japonicus|GWHPBQCV008921_mRNA=GWHTBQCV008921_Gene=GWHGBQCV008921_Position=GWHBQCV00000003:;Theobroma_cacao|XP_007024226.2;Tectona_grandis|Tg16g11590.t1;Amborella_trichopoda|XP_006850605.1;Solanum_lycopersicum|XP_004235686.1;Clinopodium_gracile|Clgra_008122-T1;Vitis_vinifera|XP_003632859.1;Oryza_sativa|XP_015619244.1;Salvia_milt…
cluster13663	11	Q9LU21	GO:0009773; P:photosynthetic electron transport in photosystem I; IMP:TAIR	Arabidopsis_thaliana|NP_188246.1;Coffea_canephora|CDO98002.1;Leonurus_japonicus|GWHPBQCV010308_mRNA=GWHTBQCV010308_Gene=GWHGBQCV010308_Position=GWHBQCV00000003:;Theobroma_cacao|XP_017978847.1;Tectona_grandis|Tg10g13580.t1;Amborella_trichopoda|XP_006833432.1;Solanum_lycopersicum|XP_004245440.1;Clinopodium_gracile|Clgra_007176-T1;Vitis_vinifera|XP_002284206.1;Oryza_sativa|XP_015645759.1;Salvia_milt…
cluster13664	11	N/A	N/A	Arabidopsis_thaliana|NP_188704.1;Coffea_canephora|CDP05805.1;Leonurus_japonicus|GWHPBQCV017082_mRNA=GWHTBQCV017082_Gene=GWHGBQCV017082_Position=GWHBQCV00000005:;Theobroma_cacao|XP_007021086.2;Tectona_grandis|Tg17g07430.t1;Amborella_trichopoda|XP_006856172.1;Solanum_lycopersicum|XP_010313653.1;Clinopodium_gracile|Clgra_033666-T1;Vitis_vinifera|XP_002280047.1;Oryza_sativa|XP_015637947.1;Salvia_milt…
cluster13667	11	N/A	N/A	Arabidopsis_thaliana|NP_565091.1;Coffea_canephora|CDP14858.1;Leonurus_japonicus|GWHPBQCV016678_mRNA=GWHTBQCV016678_Gene=GWHGBQCV016678_Position=GWHBQCV00000005:;Theobroma_cacao|XP_007037219.2;Tectona_grandis|Tg11g03170.t1;Amborella_trichopoda|XP_006842101.1;Solanum_lycopersicum|XP_004236187.1;Clinopodium_gracile|Clgra_006057-T1;Vitis_vinifera|XP_002271953.1;Oryza_sativa|XP_015626630.1;Salvia_milt…
cluster13668	11	Q9LSP1	GO:0045490; P:pectin catabolic process; IBA:GO_Central	Arabidopsis_thaliana|NP_188331.1;Coffea_canephora|CDO98756.1;Leonurus_japonicus|GWHPBQCV024257_mRNA=GWHTBQCV024257_Gene=GWHGBQCV024257_Position=GWHBQCV00000008:;Theobroma_cacao|XP_007035816.2;Tectona_grandis|Tg04g00710.t1;Amborella_trichopoda|XP_006830090.2;Solanum_lycopersicum|XP_019066992.1;Clinopodium_gracile|Clgra_036652-T1;Vitis_vinifera|XP_002272939.1;Oryza_sativa|XP_015630061.1;Salvia_milt…
cluster13669	11	Q9RB36	GO:0031119; P:tRNA pseudouridine synthesis; IEA:UniProtKB-UniRule	Arabidopsis_thaliana|NP_196950.2;Coffea_canephora|CDP16613.1;Leonurus_japonicus|GWHPBQCV024135_mRNA=GWHTBQCV024135_Gene=GWHGBQCV024135_Position=GWHBQCV00000007:;Theobroma_cacao|XP_017975967.1;Tectona_grandis|Tg09g13800.t1;Amborella_trichopoda|XP_006852373.1;Solanum_lycopersicum|XP_004231838.1;Clinopodium_gracile|Clgra_034937-T1;Vitis_vinifera|XP_002272379.1;Oryza_sativa|XP_015639769.1;Salvia_milt…
cluster13671	11	O23304	GO:0031098; P:stress-activated protein kinase signaling cascade; IBA:GO_Central	Arabidopsis_thaliana|NP_193184.1;Coffea_canephora|CDP20133.1;Leonurus_japonicus|GWHPBQCV014492_mRNA=GWHTBQCV014492_Gene=GWHGBQCV014492_Position=GWHBQCV00000004:;Theobroma_cacao|XP_007035033.2;Tectona_grandis|Tg08g03410.t1;Amborella_trichopoda|XP_006845194.2;Solanum_lycopersicum|XP_004241017.2;Clinopodium_gracile|Clgra_028876-T1;Vitis_vinifera|XP_010650049.1;Oryza_sativa|XP_015629150.1;Salvia_milt…
cluster13674	11	Q9SGD2	GO:0006486; P:protein glycosylation; IEA:InterPro	Arabidopsis_thaliana|NP_172305.1;Coffea_canephora|CDP06937.1;Leonurus_japonicus|GWHPBQCV004225_mRNA=GWHTBQCV004225_Gene=GWHGBQCV004225_Position=GWHBQCV00000010:;Theobroma_cacao|XP_017983687.1;Tectona_grandis|Tg14g02430.t1;Amborella_trichopoda|XP_006851485.1;Solanum_lycopersicum|XP_004241316.1;Clinopodium_gracile|Clgra_014713-T1;Vitis_vinifera|XP_002277132.1;Oryza_sativa|XP_015621154.1;Salvia_milt…
cluster13675	11	Q9LH39	GO:0015846; P:polyamine transport; IDA:TAIR	Arabidopsis_thaliana|NP_188589.1;Leonurus_japonicus|GWHPBQCV021271_mRNA=GWHTBQCV021271_Gene=GWHGBQCV021271_Position=GWHBQCV00000007:;Theobroma_cacao|XP_007042604.2;Tectona_grandis|Tg12g11990.t1;Amborella_trichopoda|XP_006841974.2;Solanum_lycopersicum|XP_004248916.1;Clinopodium_gracile|Clgra_012434-T1;Vitis_vinifera|XP_002263556.1;Oryza_sativa|XP_015618171.1;Salvia_miltiorrhiza|XP_057811487.1;Coff…
cluster13677	11	P73245	GO:0006782; P:protoporphyrinogen IX biosynthetic process; IEA:UniProtKB-UniPathway	Arabidopsis_thaliana|NP_201134.1;Coffea_canephora|CDP15041.1;Leonurus_japonicus|GWHPBQCV010889_mRNA=GWHTBQCV010889_Gene=GWHGBQCV010889_Position=GWHBQCV00000003:;Theobroma_cacao|XP_007037875.2;Tectona_grandis|Tg10g09060.t1;Amborella_trichopoda|XP_020530366.1;Solanum_lycopersicum|XP_004236325.1;Clinopodium_gracile|Clgra_009352-T1;Vitis_vinifera|XP_002262672.1;Oryza_sativa|XP_015618238.1;Salvia_milt…
cluster13706	11	Q8S9L5	GO:0043335; P:protein unfolding; IBA:GO_Central	Vitis_vinifera|XP_002277545.1;Coffea_canephora|CDP13781.1;Leonurus_japonicus|GWHPBQCV001901_mRNA=GWHTBQCV001901_Gene=GWHGBQCV001901_Position=GWHBQCV00000001:;Theobroma_cacao|XP_007020702.2;Tectona_grandis|Tg02g07880.t1;Amborella_trichopoda|XP_011629181.1;Solanum_lycopersicum|XP_004244088.1;Clinopodium_gracile|Clgra_003944-T1;Oryza_sativa|XP_015641143.1;Arabidopsis_thaliana|NP_200333.2;Salvia_milt…
cluster13709	11	F4KDA6	GO:0016021; C:integral component of membrane; IEA:UniProtKB-KW	Oryza_sativa|XP_015623740.1;Coffea_canephora|CDP05310.1;Leonurus_japonicus|GWHPBQCV007257_mRNA=GWHTBQCV007257_Gene=GWHGBQCV007257_Position=GWHBQCV00000002:;Theobroma_cacao|XP_007038430.2;Tectona_grandis|Tg06g12870.t1;Amborella_trichopoda|XP_006844815.1;Solanum_lycopersicum|XP_004234940.1;Clinopodium_gracile|Clgra_024675-T1;Vitis_vinifera|XP_002264722.1;Arabidopsis_thaliana|NP_001032057.1;Salvia_m…
cluster13713	11	N/A	N/A	Oryza_sativa|XP_015621024.2;Coffea_canephora|CDP09650.1;Leonurus_japonicus|GWHPBQCV007942_mRNA=GWHTBQCV007942_Gene=GWHGBQCV007942_Position=GWHBQCV00000002:;Theobroma_cacao|XP_007015361.2;Tectona_grandis|Tg05g07860.t1;Amborella_trichopoda|XP_011627204.1;Solanum_lycopersicum|XP_004250882.1;Clinopodium_gracile|Clgra_016405-T1;Vitis_vinifera|XP_002280699.1;Arabidopsis_thaliana|NP_196787.1;Salvia_milt…
cluster13716	11	Q6DBG8	GO:0006486; P:protein glycosylation; IEA:InterPro	Oryza_sativa|XP_015637045.1;Coffea_canephora|CDP17826.1;Leonurus_japonicus|GWHPBQCV019287_mRNA=GWHTBQCV019287_Gene=GWHGBQCV019287_Position=GWHBQCV00000006:;Theobroma_cacao|XP_007020235.2;Tectona_grandis|Tg03g10070.t1;Amborella_trichopoda|XP_006852917.1;Solanum_lycopersicum|XP_004250356.1;Clinopodium_gracile|Clgra_037280-T1;Vitis_vinifera|XP_002270238.2;Arabidopsis_thaliana|NP_564443.1;Salvia_milt…
cluster13718	11	N/A	N/A	Oryza_sativa|XP_015642975.1;Coffea_canephora|CDP03195.1;Leonurus_japonicus|GWHPBQCV005089_mRNA=GWHTBQCV005089_Gene=GWHGBQCV005089_Position=GWHBQCV00000010:;Theobroma_cacao|XP_017982828.1;Tectona_grandis|Tg02g05200.t1;Amborella_trichopoda|XP_006854006.1;Solanum_lycopersicum|XP_004243151.1;Clinopodium_gracile|Clgra_007693-T1;Vitis_vinifera|XP_002282754.1;Arabidopsis_thaliana|NP_194681.1;Salvia_milt…
cluster13720	11	Q7T3C7	GO:0010842; P:retina layer formation; IMP:UniProtKB	Oryza_sativa|XP_015621272.1;Coffea_canephora|CDP05967.1;Leonurus_japonicus|GWHPBQCV001816_mRNA=GWHTBQCV001816_Gene=GWHGBQCV001816_Position=GWHBQCV00000001:;Theobroma_cacao|XP_007021608.2;Tectona_grandis|Tg17g09140.t1;Amborella_trichopoda|XP_006852556.1;Solanum_lycopersicum|XP_004251875.1;Clinopodium_gracile|Clgra_013530-T1;Vitis_vinifera|XP_002285254.1;Arabidopsis_thaliana|NP_188127.1;Salvia_milt…
cluster13721	11	Q09020	N/A	Oryza_sativa|XP_015615890.1;Coffea_canephora|CDP03908.1;Leonurus_japonicus|GWHPBQCV000273_mRNA=GWHTBQCV000273_Gene=GWHGBQCV000273_Position=GWHBQCV00000001:;Theobroma_cacao|XP_017970489.1;Tectona_grandis|Tg14g01040.t1;Amborella_trichopoda|XP_006848477.1;Solanum_lycopersicum|XP_010321793.1;Vitis_vinifera|XP_002265382.2;Arabidopsis_thaliana|NP_189149.2;Salvia_miltiorrhiza|XP_057808900.1;Clinopodium_…
cluster13722	11	Q9SAH3	GO:0006468; P:protein phosphorylation; IBA:GO_Central	Oryza_sativa|XP_015648604.1;Coffea_canephora|CDO98236.1;Leonurus_japonicus|GWHPBQCV012275_mRNA=GWHTBQCV012275_Gene=GWHGBQCV012275_Position=GWHBQCV00000004:;Theobroma_cacao|XP_007023449.1;Tectona_grandis|Tg16g10150.t1;Amborella_trichopoda|XP_006845360.1;Solanum_lycopersicum|XP_004235896.1;Clinopodium_gracile|Clgra_011573-T1;Arabidopsis_thaliana|NP_178202.1;Salvia_miltiorrhiza|XP_057787828.1;Vitis_…
cluster13725	11	A4FV72	GO:0000413; P:protein peptidyl-prolyl isomerization; ISS:UniProtKB	Oryza_sativa|XP_015628605.1;Coffea_canephora|CDP00454.1;Leonurus_japonicus|GWHPBQCV020270_mRNA=GWHTBQCV020270_Gene=GWHGBQCV020270_Position=GWHBQCV00000006:;Theobroma_cacao|XP_007048600.1;Tectona_grandis|Tg15g12060.t1;Amborella_trichopoda|XP_006856408.1;Solanum_lycopersicum|XP_004237059.1;Clinopodium_gracile|Clgra_031969-T1;Vitis_vinifera|XP_002265598.1;Arabidopsis_thaliana|NP_563931.2;Salvia_milt…
cluster13728	11	Q9FLE8	GO:0045454; P:cell redox homeostasis; IEA:InterPro	Oryza_sativa|XP_015635004.1;Coffea_canephora|CDP15428.1;Leonurus_japonicus|GWHPBQCV010429_mRNA=GWHTBQCV010429_Gene=GWHGBQCV010429_Position=GWHBQCV00000003:;Theobroma_cacao|XP_007027759.2;Tectona_grandis|Tg01g17540.t1;Amborella_trichopoda|XP_006855070.1;Solanum_lycopersicum|XP_004246512.1;Clinopodium_gracile|Clgra_010711-T1;Vitis_vinifera|XP_002276568.1;Arabidopsis_thaliana|NP_196007.1;Salvia_milt…
cluster13730	11	Q9LPC7	GO:0000413; P:protein peptidyl-prolyl isomerization; IBA:GO_Central	Oryza_sativa|XP_015641711.1;Coffea_canephora|CDP17790.1;Leonurus_japonicus|GWHPBQCV003765_mRNA=GWHTBQCV003765_Gene=GWHGBQCV003765_Position=GWHBQCV00000010:;Theobroma_cacao|XP_007052021.1;Tectona_grandis|Tg06g03540.t1;Amborella_trichopoda|XP_006858032.2;Solanum_lycopersicum|XP_004244467.1;Clinopodium_gracile|Clgra_025337-T1;Vitis_vinifera|XP_002274583.1;Arabidopsis_thaliana|NP_171696.2;Salvia_milt…
cluster13732	11	O48928	GO:0016709; F:oxidoreductase activity, acting on paired donors, with incorporation or reduction of molecular oxygen, NAD(P)H as one donor, and incorporation of one atom of oxygen; IBA:GO_Central	Oryza_sativa|XP_015641942.1;Coffea_canephora|CDP04373.1;Leonurus_japonicus|GWHPBQCV000753_mRNA=GWHTBQCV000753_Gene=GWHGBQCV000753_Position=GWHBQCV00000001:;Theobroma_cacao|XP_007026022.1;Tectona_grandis|Tg17g04200.t1;Amborella_trichopoda|XP_006858061.3;Solanum_lycopersicum|XP_010316601.1;Clinopodium_gracile|Clgra_038918-T1;Vitis_vinifera|XP_002265911.1;Arabidopsis_thaliana|NP_172626.1;Salvia_milt…
cluster13737	11	Q86JE1	GO:0005509; F:calcium ion binding; IEA:InterPro	Arabidopsis_thaliana|NP_566015.1;Coffea_canephora|CDP07667.1;Leonurus_japonicus|GWHPBQCV003982_mRNA=GWHTBQCV003982_Gene=GWHGBQCV003982_Position=GWHBQCV00000010:;Theobroma_cacao|XP_007029124.1;Tectona_grandis|Tg06g06450.t1;Amborella_trichopoda|XP_006849581.1;Solanum_lycopersicum|XP_004229340.1;Clinopodium_gracile|Clgra_025988-T1;Vitis_vinifera|XP_002270910.1;Salvia_miltiorrhiza|XP_057807612.1;Oryz…
cluster13742	11	Q8L7W0	GO:0030136; C:clathrin-coated vesicle; IEA:UniProtKB-SubCell	Arabidopsis_thaliana|NP_193540.3;Coffea_canephora|CDP19824.1;Leonurus_japonicus|GWHPBQCV002961_mRNA=GWHTBQCV002961_Gene=GWHGBQCV002961_Position=GWHBQCV00000001:;Theobroma_cacao|XP_017978897.1;Tectona_grandis|Tg02g17300.t2;Amborella_trichopoda|XP_011625226.1;Solanum_lycopersicum|XP_004232988.1;Clinopodium_gracile|Clgra_004537-T1;Vitis_vinifera|XP_002272365.1;Oryza_sativa|XP_015647585.1;Salvia_milt…
cluster13746	11	Q9SKT6	GO:0045489; P:pectin biosynthetic process; IEA:UniProtKB-UniPathway	Arabidopsis_thaliana|NP_565485.1;Coffea_canephora|CDP14710.1;Leonurus_japonicus|GWHPBQCV027223_mRNA=GWHTBQCV027223_Gene=GWHGBQCV027223_Position=GWHBQCV00000009:;Theobroma_cacao|XP_007043494.1;Tectona_grandis|Tg13g02810.t2;Amborella_trichopoda|XP_006841805.2;Solanum_lycopersicum|XP_004237714.1;Clinopodium_gracile|Clgra_002165-T1;Vitis_vinifera|XP_002279062.1;Oryza_sativa|XP_015636276.1;Salvia_milt…
cluster13747	11	Q7Y0D4	GO:0006662; P:glycerol ether metabolic process; IEA:InterPro	Arabidopsis_thaliana|NP_195437.1;Coffea_canephora|CDP04575.1;Leonurus_japonicus|GWHPBQCV016318_mRNA=GWHTBQCV016318_Gene=GWHGBQCV016318_Position=GWHBQCV00000005:;Theobroma_cacao|XP_007045228.2;Tectona_grandis|Tg07g07000.t2;Amborella_trichopoda|XP_011627732.1;Solanum_lycopersicum|XP_004244089.1;Clinopodium_gracile|Clgra_019088-T1;Vitis_vinifera|XP_003635085.1;Oryza_sativa|XP_015630895.1;Salvia_milt…
cluster13752	11	Q8S9M4	GO:0008270; F:zinc ion binding; IEA:InterPro	Arabidopsis_thaliana|NP_850342.2;Coffea_canephora|CDP15962.1;Leonurus_japonicus|GWHPBQCV002844_mRNA=GWHTBQCV002844_Gene=GWHGBQCV002844_Position=GWHBQCV00000001:;Theobroma_cacao|XP_007044099.2;Tectona_grandis|Tg13g04080.t1;Amborella_trichopoda|XP_011625904.2;Solanum_lycopersicum|XP_004243267.1;Clinopodium_gracile|Clgra_002436-T1;Vitis_vinifera|XP_002277494.1;Oryza_sativa|XP_015628050.1;Salvia_milt…
cluster13756	11	Q9FYC2	GO:0010154; P:fruit development; IMP:TAIR	Arabidopsis_thaliana|NP_190074.1;Coffea_canephora|CDP07022.1;Leonurus_japonicus|GWHPBQCV004287_mRNA=GWHTBQCV004287_Gene=GWHGBQCV004287_Position=GWHBQCV00000010:;Theobroma_cacao|XP_007016058.2;Tectona_grandis|Tg14g03050.t1;Amborella_trichopoda|XP_006843109.1;Solanum_lycopersicum|NP_001234535.2;Clinopodium_gracile|Clgra_014796-T1;Vitis_vinifera|XP_002274210.1;Oryza_sativa|XP_015633218.1;Salvia_milt…
cluster13757	11	Q8LPB4	GO:0004674; F:protein serine/threonine kinase activity; IEA:UniProtKB-KW	Arabidopsis_thaliana|NP_178330.1;Coffea_canephora|CDP07970.1;Leonurus_japonicus|GWHPBQCV011870_mRNA=GWHTBQCV011870_Gene=GWHGBQCV011870_Position=GWHBQCV00000003:;Theobroma_cacao|XP_017971937.1;Tectona_grandis|Tg11g08070.t1;Amborella_trichopoda|XP_006847965.1;Solanum_lycopersicum|XP_004228537.1;Vitis_vinifera|XP_002273186.2;Oryza_sativa|XP_015626989.1;Salvia_miltiorrhiza|XP_057777784.1;Clinopodium_…
cluster13759	11	Q1PFQ9	GO:0009451; P:RNA modification; IBA:GO_Central	Arabidopsis_thaliana|NP_174190.2;Coffea_canephora|CDO96747.1;Leonurus_japonicus|GWHPBQCV003053_mRNA=GWHTBQCV003053_Gene=GWHGBQCV003053_Position=GWHBQCV00000001:;Theobroma_cacao|XP_017978109.1;Tectona_grandis|Tg02g16010.t1;Amborella_trichopoda|XP_020525329.1;Solanum_lycopersicum|XP_010312638.1;Clinopodium_gracile|Clgra_007336-T1;Vitis_vinifera|XP_002267303.1;Oryza_sativa|XP_015633326.1;Salvia_milt…
cluster13763	11	Q24JJ9	GO:0015031; P:protein transport; IEA:UniProtKB-KW	Arabidopsis_thaliana|NP_567858.1;Coffea_canephora|CDP02855.1;Leonurus_japonicus|GWHPBQCV004799_mRNA=GWHTBQCV004799_Gene=GWHGBQCV004799_Position=GWHBQCV00000010:;Theobroma_cacao|XP_017983323.1;Tectona_grandis|Tg01g07520.t2;Amborella_trichopoda|XP_006845410.1;Solanum_lycopersicum|XP_004242624.1;Clinopodium_gracile|Clgra_022965-T1;Vitis_vinifera|XP_002273237.1;Oryza_sativa|XP_015648603.1;Salvia_milt…
cluster13764	11	Q8L9A9	GO:0010411; P:xyloglucan metabolic process; IEA:InterPro	Arabidopsis_thaliana|NP_563892.1;Coffea_canephora|CDO99711.1;Leonurus_japonicus|GWHPBQCV002713_mRNA=GWHTBQCV002713_Gene=GWHGBQCV002713_Position=GWHBQCV00000001:;Theobroma_cacao|XP_007025991.2;Tectona_grandis|Tg02g12950.t1;Amborella_trichopoda|XP_006826491.1;Solanum_lycopersicum|XP_004234486.1;Clinopodium_gracile|Clgra_004873-T1;Vitis_vinifera|XP_002264995.1;Oryza_sativa|XP_015645224.1;Salvia_milt…
cluster13767	11	Q8S9K3	GO:0006397; P:mRNA processing; IEA:UniProtKB-KW	Arabidopsis_thaliana|NP_175290.1;Coffea_canephora|CDO98343.1;Leonurus_japonicus|GWHPBQCV010866_mRNA=GWHTBQCV010866_Gene=GWHGBQCV010866_Position=GWHBQCV00000003:;Theobroma_cacao|XP_017972126.1;Tectona_grandis|Tg10g09280.t1;Amborella_trichopoda|XP_006828420.2;Solanum_lycopersicum|XP_004235791.1;Clinopodium_gracile|Clgra_007736-T1;Vitis_vinifera|XP_002278671.2;Salvia_miltiorrhiza|XP_057791510.1;Oryz…
cluster13768	11	Q8LDM2	GO:0080110; P:sporopollenin biosynthetic process; IMP:TAIR	Arabidopsis_thaliana|NP_567971.1;Coffea_canephora|CDO96957.1;Theobroma_cacao|XP_007041944.1;Tectona_grandis|Tg12g15700.t1;Amborella_trichopoda|XP_006854881.2;Solanum_lycopersicum|XP_004230925.1;Clinopodium_gracile|Clgra_005442-T1;Vitis_vinifera|XP_002276653.1;Oryza_sativa|XP_015646301.1;Salvia_miltiorrhiza|XP_057788498.1;Leonurus_japonicus|GWHPBQCV021942_mRNA=GWHTBQCV021942_Gene=GWHGBQCV021942_Po…
cluster13771	11	Q9FL51	GO:0046777; P:protein autophosphorylation; IBA:GO_Central	Arabidopsis_thaliana|NP_196311.1;Coffea_canephora|CDP10085.1;Leonurus_japonicus|GWHPBQCV005242_mRNA=GWHTBQCV005242_Gene=GWHGBQCV005242_Position=GWHBQCV00000010:;Theobroma_cacao|XP_017976596.1;Tectona_grandis|Tg01g01490.t1;Amborella_trichopoda|XP_006850155.1;Solanum_lycopersicum|XP_004234802.2;Clinopodium_gracile|Clgra_023450-T1;Vitis_vinifera|XP_002283010.2;Oryza_sativa|XP_015636545.1;Salvia_milt…
cluster13775	11	O65199	GO:0004784; F:superoxide dismutase activity; IEA:UniProtKB-EC	Arabidopsis_thaliana|NP_565666.1;Leonurus_japonicus|GWHPBQCV013416_mRNA=GWHTBQCV013416_Gene=GWHGBQCV013416_Position=GWHBQCV00000004:;Theobroma_cacao|XP_007016064.2;Tectona_grandis|Tg14g03090.t3;Amborella_trichopoda|XP_006837962.1;Solanum_lycopersicum|NP_001234769.2;Clinopodium_gracile|Clgra_014800-T1;Vitis_vinifera|NP_001268067.1;Oryza_sativa|XP_015649518.1;Salvia_miltiorrhiza|XP_057804613.1;Coff…
cluster13777	11	O74507	GO:0008202; P:steroid metabolic process; IC:PomBase	Arabidopsis_thaliana|NP_182212.1;Coffea_canephora|CDP16282.1;Leonurus_japonicus|GWHPBQCV013784_mRNA=GWHTBQCV013784_Gene=GWHGBQCV013784_Position=GWHBQCV00000004:;Theobroma_cacao|XP_007051361.2;Tectona_grandis|Tg18g03280.t1;Amborella_trichopoda|XP_006846502.2;Solanum_lycopersicum|XP_004233472.1;Clinopodium_gracile|Clgra_020847-T1;Vitis_vinifera|XP_010661540.1;Oryza_sativa|XP_015634009.1;Salvia_milt…
cluster13778	11	Q9FEE2	GO:0009826; P:unidimensional cell growth; TAS:TAIR	Arabidopsis_thaliana|NP_568364.1;Coffea_canephora|CDO98895.1;Leonurus_japonicus|GWHPBQCV020860_mRNA=GWHTBQCV020860_Gene=GWHGBQCV020860_Position=GWHBQCV00000007:;Theobroma_cacao|XP_007035515.1;Tectona_grandis|Tg08g12720.t3;Amborella_trichopoda|XP_020529871.1;Solanum_lycopersicum|XP_004229208.1;Clinopodium_gracile|Clgra_011252-T1;Vitis_vinifera|XP_002275193.1;Oryza_sativa|XP_015640403.1;Salvia_milt…
cluster13779	11	Q9XF89	GO:0010114; P:response to red light; IEP:TAIR	Arabidopsis_thaliana|NP_192772.1;Coffea_canephora|CDP11537.1;Leonurus_japonicus|GWHPBQCV018758_mRNA=GWHTBQCV018758_Gene=GWHGBQCV018758_Position=GWHBQCV00000006:;Theobroma_cacao|XP_007019740.2;Tectona_grandis|Tg03g13780.t1;Amborella_trichopoda|XP_006836916.1;Solanum_lycopersicum|NP_001317571.1;Clinopodium_gracile|Clgra_037543-T1;Vitis_vinifera|XP_002264295.1;Oryza_sativa|XP_015617156.1;Salvia_milt…
cluster13782	11	O65039	GO:0008234; F:cysteine-type peptidase activity; IEA:UniProtKB-KW	Arabidopsis_thaliana|NP_568722.1;Coffea_canephora|CDP15086.1;Leonurus_japonicus|GWHPBQCV010687_mRNA=GWHTBQCV010687_Gene=GWHGBQCV010687_Position=GWHBQCV00000003:;Theobroma_cacao|XP_007037812.2;Tectona_grandis|Tg10g01780.t1;Amborella_trichopoda|XP_006852216.1;Solanum_lycopersicum|NP_001316891.1;Clinopodium_gracile|Clgra_028120-T1;Vitis_vinifera|XP_002278323.2;Oryza_sativa|XP_015648227.1;Salvia_milt…
cluster13783	11	Q9FGQ6	GO:0009652; P:thigmotropism; IMP:TAIR	Arabidopsis_thaliana|NP_201528.1;Coffea_canephora|CDP02538.1;Leonurus_japonicus|GWHPBQCV022760_mRNA=GWHTBQCV022760_Gene=GWHGBQCV022760_Position=GWHBQCV00000007:;Theobroma_cacao|XP_007047390.2;Tectona_grandis|Tg09g05930.t1;Amborella_trichopoda|XP_006844015.1;Solanum_lycopersicum|XP_004231880.1;Clinopodium_gracile|Clgra_034254-T1;Vitis_vinifera|XP_002283607.1;Oryza_sativa|XP_015613828.1;Salvia_milt…
cluster13794	11	N/A	N/A	Arabidopsis_thaliana|NP_566942.1;Coffea_canephora|CDP01956.1;Leonurus_japonicus|GWHPBQCV022873_mRNA=GWHTBQCV022873_Gene=GWHGBQCV022873_Position=GWHBQCV00000007:;Theobroma_cacao|XP_017972309.1;Tectona_grandis|Tg09g12230.t1;Amborella_trichopoda|XP_006850193.1;Solanum_lycopersicum|XP_004236872.1;Clinopodium_gracile|Clgra_035486-T1;Vitis_vinifera|XP_002274615.1;Oryza_sativa|XP_015639130.1;Salvia_milt…
cluster13795	11	Q8VYF9	GO:0016757; F:transferase activity, transferring glycosyl groups; IEA:UniProtKB-KW	Arabidopsis_thaliana|NP_566148.2;Coffea_canephora|CDP16647.1;Leonurus_japonicus|GWHPBQCV024157_mRNA=GWHTBQCV024157_Gene=GWHGBQCV024157_Position=GWHBQCV00000007:;Theobroma_cacao|XP_007031710.2;Tectona_grandis|Tg09g13400.t1;Amborella_trichopoda|XP_011626151.1;Solanum_lycopersicum|XP_004238851.1;Clinopodium_gracile|Clgra_034893-T1;Vitis_vinifera|XP_002271170.1;Oryza_sativa|XP_015638657.1;Salvia_milt…
cluster13796	11	Q9LXU9	N/A	Arabidopsis_thaliana|NP_191627.1;Coffea_canephora|CDP19941.1;Leonurus_japonicus|GWHPBQCV003833_mRNA=GWHTBQCV003833_Gene=GWHGBQCV003833_Position=GWHBQCV00000010:;Theobroma_cacao|XP_007052116.2;Tectona_grandis|Tg06g03940.t1;Amborella_trichopoda|XP_006840957.1;Solanum_lycopersicum|XP_004240051.1;Clinopodium_gracile|Clgra_025400-T1;Vitis_vinifera|XP_002274330.1;Oryza_sativa|XP_015612917.1;Salvia_milt…
cluster13797	11	N/A	N/A	Arabidopsis_thaliana|NP_566369.1;Coffea_canephora|CDP14215.1;Leonurus_japonicus|GWHPBQCV003389_mRNA=GWHTBQCV003389_Gene=GWHGBQCV003389_Position=GWHBQCV00000001:;Theobroma_cacao|XP_017977857.1;Tectona_grandis|Tg13g14640.t2;Amborella_trichopoda|XP_006843355.1;Solanum_lycopersicum|XP_004237331.1;Clinopodium_gracile|Clgra_019636-T1;Vitis_vinifera|XP_002275793.1;Oryza_sativa|XP_015610808.1;Salvia_milt…
cluster13800	11	P29790	GO:0015986; P:ATP synthesis coupled proton transport; IEA:InterPro	Arabidopsis_thaliana|NP_567265.1;Coffea_canephora|CDP04403.1;Leonurus_japonicus|GWHPBQCV002679_mRNA=GWHTBQCV002679_Gene=GWHGBQCV002679_Position=GWHBQCV00000001:;Theobroma_cacao|XP_007026083.1;Tectona_grandis|Tg02g12570.t1;Amborella_trichopoda|XP_006855900.1;Solanum_lycopersicum|XP_004232711.1;Clinopodium_gracile|Clgra_004837-T1;Vitis_vinifera|XP_002275015.1;Oryza_sativa|XP_015646852.1;Salvia_milt…
cluster13801	11	N/A	N/A	Arabidopsis_thaliana|NP_181964.1;Coffea_canephora|CDP07676.1;Leonurus_japonicus|GWHPBQCV021652_mRNA=GWHTBQCV021652_Gene=GWHGBQCV021652_Position=GWHBQCV00000007:;Theobroma_cacao|XP_007052618.2;Tectona_grandis|Tg05g14930.t1;Amborella_trichopoda|XP_011627506.1;Solanum_lycopersicum|XP_004248825.1;Clinopodium_gracile|Clgra_015653-T1;Vitis_vinifera|XP_002267950.1;Oryza_sativa|XP_015611847.1;Salvia_milt…
cluster13803	11	Q9C9K2	GO:0019253; P:reductive pentose-phosphate cycle; IEA:UniProtKB-KW	Arabidopsis_thaliana|NP_565134.1;Coffea_canephora|CDP07245.1;Leonurus_japonicus|GWHPBQCV014256_mRNA=GWHTBQCV014256_Gene=GWHGBQCV014256_Position=GWHBQCV00000004:;Theobroma_cacao|XP_007010913.2;Tectona_grandis|Tg08g07280.t1;Amborella_trichopoda|XP_011625409.1;Solanum_lycopersicum|XP_019069278.1;Clinopodium_gracile|Clgra_029333-T1;Vitis_vinifera|XP_002276622.1;Oryza_sativa|XP_015649016.1;Salvia_milt…
cluster13805	11	N/A	N/A	Arabidopsis_thaliana|NP_565852.1;Coffea_canephora|CDP15284.1;Leonurus_japonicus|GWHPBQCV015982_mRNA=GWHTBQCV015982_Gene=GWHGBQCV015982_Position=GWHBQCV00000005:;Theobroma_cacao|XP_007027457.2;Tectona_grandis|Tg01g16200.t1;Amborella_trichopoda|XP_011621563.1;Solanum_lycopersicum|XP_004249475.2;Clinopodium_gracile|Clgra_010847-T1;Vitis_vinifera|XP_002268582.1;Oryza_sativa|XP_015620907.1;Salvia_milt…
cluster13806	11	Q39090	GO:0031146; P:SCF-dependent proteasomal ubiquitin-dependent protein catabolic process; IGI:TAIR	Arabidopsis_thaliana|NP_564368.1;Coffea_canephora|CDP18190.1;Leonurus_japonicus|GWHPBQCV001957_mRNA=GWHTBQCV001957_Gene=GWHGBQCV001957_Position=GWHBQCV00000001:;Theobroma_cacao|XP_007041011.1;Tectona_grandis|Tg02g20520.t1;Amborella_trichopoda|XP_006853485.1;Solanum_lycopersicum|NP_001234215.2;Clinopodium_gracile|Clgra_003985-T1;Vitis_vinifera|XP_002275773.1;Oryza_sativa|XP_015642415.1;Salvia_milt…
cluster13808	11	Q9LZ03	GO:0007131; P:reciprocal meiotic recombination; IBA:GO_Central	Arabidopsis_thaliana|NP_195902.1;Coffea_canephora|CDP06692.1;Leonurus_japonicus|GWHPBQCV027782_mRNA=GWHTBQCV027782_Gene=GWHGBQCV027782_Position=GWHBQCV00000009:;Theobroma_cacao|XP_017976926.1;Tectona_grandis|Tg02g01030.t1;Amborella_trichopoda|XP_006828295.1;Solanum_lycopersicum|XP_004246706.1;Clinopodium_gracile|Clgra_008731-T1;Vitis_vinifera|XP_002274790.1;Oryza_sativa|XP_015628111.2;Salvia_milt…
cluster13809	11	Q9FMX6	GO:0009507; C:chloroplast; IDA:TAIR	Arabidopsis_thaliana|NP_197715.1;Coffea_canephora|CDP14399.1;Leonurus_japonicus|GWHPBQCV018768_mRNA=GWHTBQCV018768_Gene=GWHGBQCV018768_Position=GWHBQCV00000006:;Theobroma_cacao|XP_007043272.2;Tectona_grandis|Tg03g02410.t1;Amborella_trichopoda|XP_006847860.1;Solanum_lycopersicum|XP_004231500.1;Clinopodium_gracile|Clgra_038997-T1;Vitis_vinifera|XP_002272283.1;Oryza_sativa|XP_015635993.1;Salvia_milt…

## Sheet: Table S6
Table S6 Related genes of MEP and MVP pathways.
Pathways	Enzyme	Acronym	transcript ID	Homology gene id
MVA	Acetoacetyl-CoA thiolase	ACAT	Clgra_001803-T1;Clgra_004697-T1	Maker00019487; Maker00018877; Maker00010292; Maker00011273; Maker00011286
	3-hydroxy-3-methylglutaryl CoA synthase	HMGS	Clgra_012702-T1	Maker00003407; Maker00028799
	3-hydroxy-3-methylglutaryl CoA reductase	HMGR	Clgra_005207-T1;Clgra_006817-T1;Clgra_012833-T1;Clgra_015323-T1;Clgra_027854-T1;Clgra_029326-T1;Clgra_039176-T1;Clgra_015321-T1	Maker00001945; Maker00021635
	Mevalonate kinase	MVK	Clgra_011231-T1	Maker00015376,AT5G27450
	5-phosphomevalonate kinase	PMK	Clgra_001173-T1	Maker00026952
	5-diphosphomevalonate decarboxylase	MVD	Clgra_014860-T1	Maker00012131
MEP	1-deoxy-D-xylulose 5-phosphate synthase	DXS	Clgra_023036-T1;Clgra_023037-T1;Clgra_037854-T1;Clgra_001459-T1;Clgra_035767-T1	Maker00004598; Maker00027873; Maker00012804; Maker00015435; Maker00023473; Maker00027418
	1-deoxy-D-xylulose 5-phosphate reductoisomerase	DXR	Clgra_027908-T1	Maker00016636
	2-C-methyl-D-erythritol 4-phosphate cytidyltransferase	CMS	Clgra_026906-T1	Maker00013631
	4-(cytidine 5′-diphospho)-2-C-methyl-D-erythritol kinase	CMK	Clgra_016432-T1	Maker00011107
	2-C-methyl-D-erythritol 2,4-cyclodiphosphate synthase	MDS	Clgra_001045-T1	Maker00019544
	1-hydroxy-2-methyl-2-butenyl 4-diphosphate synthase	HDS	Clgra_016929-T1	Maker00005988; Maker00025110
	1-hydroxy-2-methyl-2-butenyl 4-diphosphate reductase	HDR	Clgra_005609-T1;Clgra_005610-T1;Clgra_005613-T1;Clgra_005614-T1;Clgra_005615-T1;Clgra_005616-T1	Maker00005068; Maker00025695
	Isopentenyl diphosphate isomerase	IDI	Clgra_019041-T1;Clgra_036602-T1	Maker00016783; Maker00001381
	Geranylgeranyl diphosphate synthase	GGPS	Clgra_005261-T1;Clgra_009752-T1;Clgra_002730-T1;Clgra_015287-T1;Clgra_020566-T1;Clgra_027334-T1	Maker00007407; Maker00004767; Maker00005009; Maker00025703
	farnesyl diphosphate synthase	FPS	Clgra_004680-T1;Clgra_007632-T1;Clgra_007633-T1;Clgra_015798-T1	Maker00008168; Maker00006917
